# Supplementary material for: Substituent effects on the photorearrangements of unsymmetrically substituted diazinobarrelenes
Source: Royal Society of Chemistry journal article supplement (doi:10.1039/c2ra22276k), 2012-12-05
Supplement: c2ra22276k.pdf [file c2ra22276k.pdf]

## Supporting Information

### Substituent Effects on the Photorearrangements of Unsymmetrically Substituted Diazinobarrelenes

Hsing-Pang Hsieh, Ann-Cheng Chen, Nelson R. Villarante, Gary J. Chuang,<sup>\*,a</sup> and  
Chun-Chen Liao<sup>\*,a,b</sup>

*Department of Chemistry, Chung Yuan Christian University, Chung-Li 320, Taiwan*

*Department of Chemistry, National Tsing Hua University, Hsinchu 300, Taiwan*

[ccliao@mx.nthu.edu.tw](mailto:ccliao@mx.nthu.edu.tw)

### Table of Contents

|                                   |     |
|-----------------------------------|-----|
| 1. General Procedures.....        | S4  |
| 2. UV Spectra (10).....           | S5  |
| 3. UV Spectra (13).....           | S6  |
| 4. UV Spectra (14).....           | S7  |
| 5. UV Spectra (15).....           | S8  |
| 6. UV Spectra (16c).....          | S9  |
| 7. UV Spectra (quinoxaline).....  | S10 |
| 8. UV Spectra (40).....           | S11 |
| 9. UV Spectra (41).....           | S12 |
| 10. UV Spectra (47).....          | S13 |
| 11. UV Spectra (48).....          | S14 |
| 12. UV Spectra (49).....          | S15 |
| 13. UV Spectra(50).....           | S16 |
| 14. UV Spectra (51).....          | S17 |
| 15. UV Spectra (52).....          | S18 |
| 16. <sup>13</sup> C NMR (10)..... | S19 |
| 17. <sup>13</sup> C NMR (13)..... | S20 |
| 18. <sup>13</sup> C NMR (14)..... | S21 |
| 19. <sup>13</sup> C NMR (15)..... | S22 |
| 20. <sup>13</sup> C NMR (40)..... | S23 |
| 21. <sup>13</sup> C NMR (41)..... | S24 |

|     |                          |     |
|-----|--------------------------|-----|
| 22. | <sup>13</sup> C NMR (47) | S25 |
| 23. | <sup>13</sup> C NMR (48) | S26 |
| 24. | <sup>13</sup> C NMR (49) | S27 |
| 25. | <sup>13</sup> C NMR (50) | S28 |
| 26. | <sup>13</sup> C NMR (51) | S29 |
| 27. | <sup>13</sup> C NMR (52) | S30 |
| 28. | <sup>1</sup> H NMR (8)   | S31 |
| 29. | <sup>1</sup> H NMR (9)   | S32 |
| 30. | <sup>1</sup> H NMR (10)  | S33 |
| 31. | <sup>1</sup> H NMR (11)  | S34 |
| 32. | <sup>1</sup> H NMR (12)  | S35 |
| 33. | <sup>1</sup> H NMR (13)  | S36 |
| 34. | <sup>1</sup> H NMR (14)  | S37 |
| 35. | <sup>1</sup> H NMR (15)  | S38 |
| 36. | <sup>1</sup> H NMR (16a) | S39 |
| 37. | <sup>1</sup> H NMR (16b) | S40 |
| 38. | <sup>1</sup> H NMR (16c) | S41 |
| 39. | <sup>1</sup> H NMR (22b) | S42 |
| 40. | <sup>1</sup> H NMR (24a) | S43 |
| 41. | <sup>1</sup> H NMR (25a) | S44 |
| 42. | <sup>1</sup> H NMR (25b) | S45 |
| 46. | <sup>1</sup> H NMR (40)  | S46 |
| 47. | <sup>1</sup> H NMR (41)  | S47 |
| 48. | <sup>1</sup> H NMR (47)  | S48 |
| 49. | <sup>1</sup> H NMR (48)  | S49 |

|     |                             |     |
|-----|-----------------------------|-----|
| 50. | $^1\text{H}$ NMR (49) ..... | S50 |
| 51. | $^1\text{H}$ NMR (50) ..... | S51 |
| 52. | $^1\text{H}$ NMR (51) ..... | S52 |
| 53. | $^1\text{H}$ NMR (52) ..... | S53 |
| 54. | 2D-COSY (13) .....          | S54 |
| 55. | 2D-COSY(41) .....           | S55 |
| 56. | 2D-COSY (47, 48, 49) .....  | S56 |

General Procedures. Unless stated otherwise, reagents were obtained from commercial sources and used without further purification. Reactions were monitored using Thin-Layer Chromatographic plates (0.25 mm – silica gel plates, 60F-254) with 7% ethanolic phosphomolybdic acid ( $\text{H}_2\text{SO}_4$ ,  $\text{CeSO}_4$ ,  $(\text{NH}_4)_6\text{Mo}_7\text{O}_{24}\cdot 4\text{H}_2\text{O}$ ) as developing reagent. Standard column chromatography was conducted using 70–230 mesh silica gel. IR spectra were recorded as films on NaCl plates. Unless otherwise specified  $^1\text{H}$ ,  $^{13}\text{C}$  NMR and DEPT spectra were recorded in  $\text{CDCl}_3$  and chemical shifts were reported in  $\delta$  (ppm) using solvent resonance as the internal reference. The high resolution mass spectra (HRMS) were recorded on JEOL JMS-HX 110 mass spectrometer. Photochemical reactions were carried out in spectroscopic grade solvents. All the starting materials dissolved in specific solvents were degassed either by bubbling with argon or by sonication for 1 h. Irradiation of samples were performed in a Rayonet photoreactor using RPR 3500 ( $\lambda = 350$  nm). UV spectra of the starting materials were determined using a double-beam UV-Vis spectrophotometer.

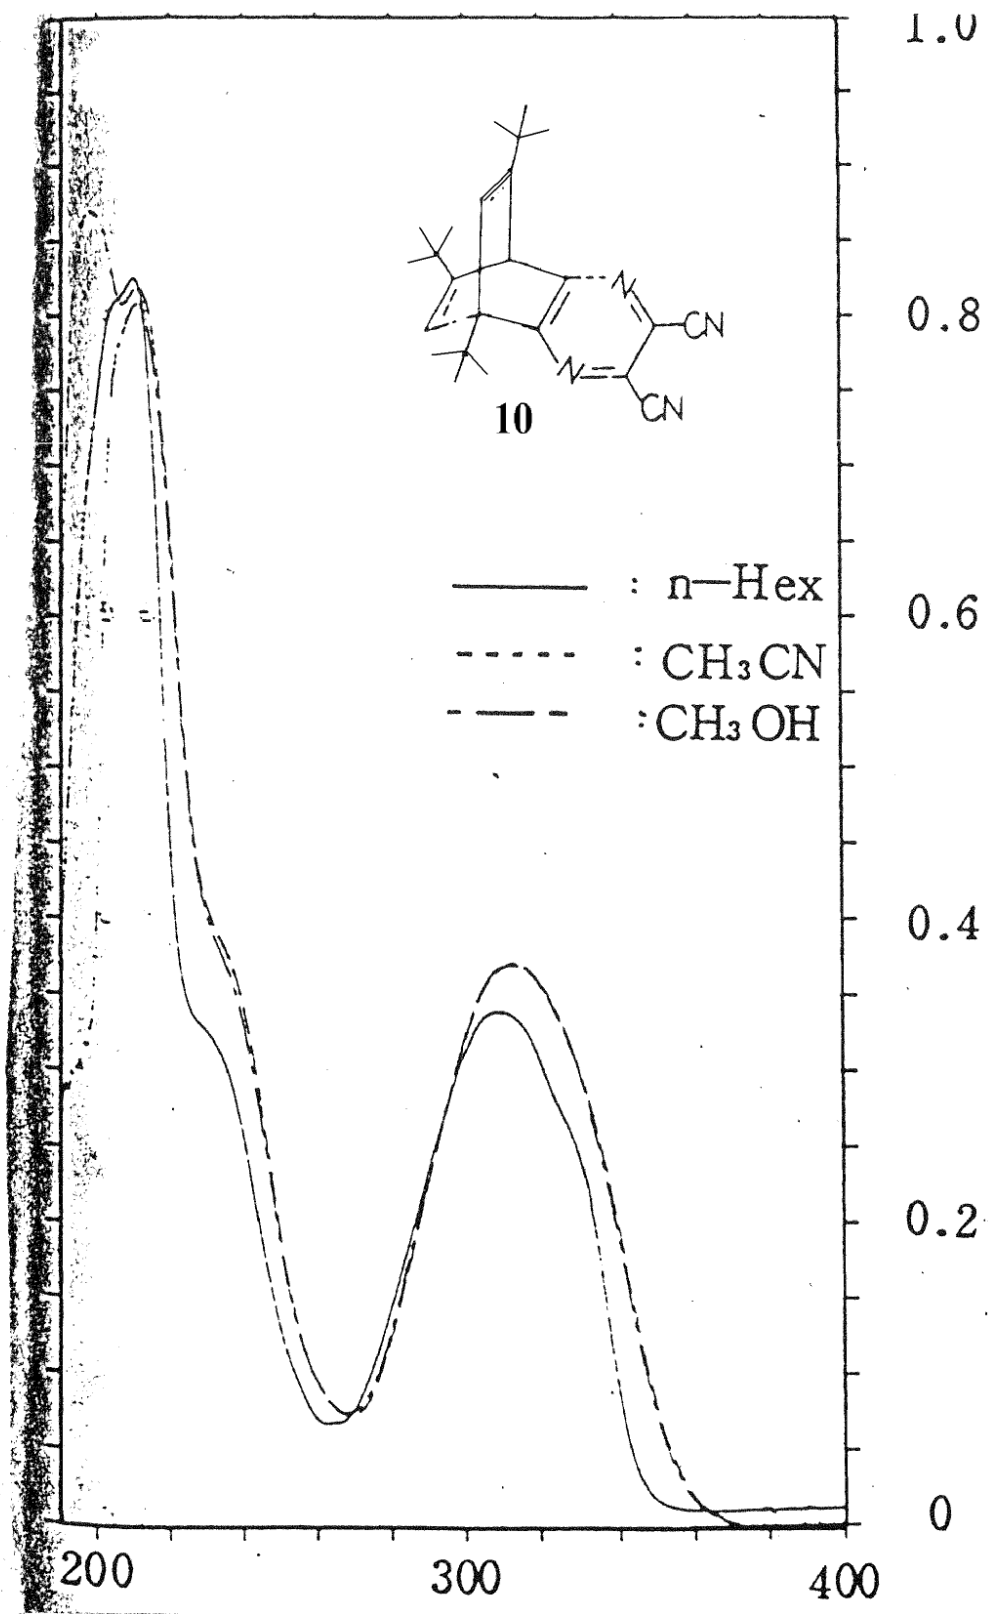

UV Spectra (**10**)

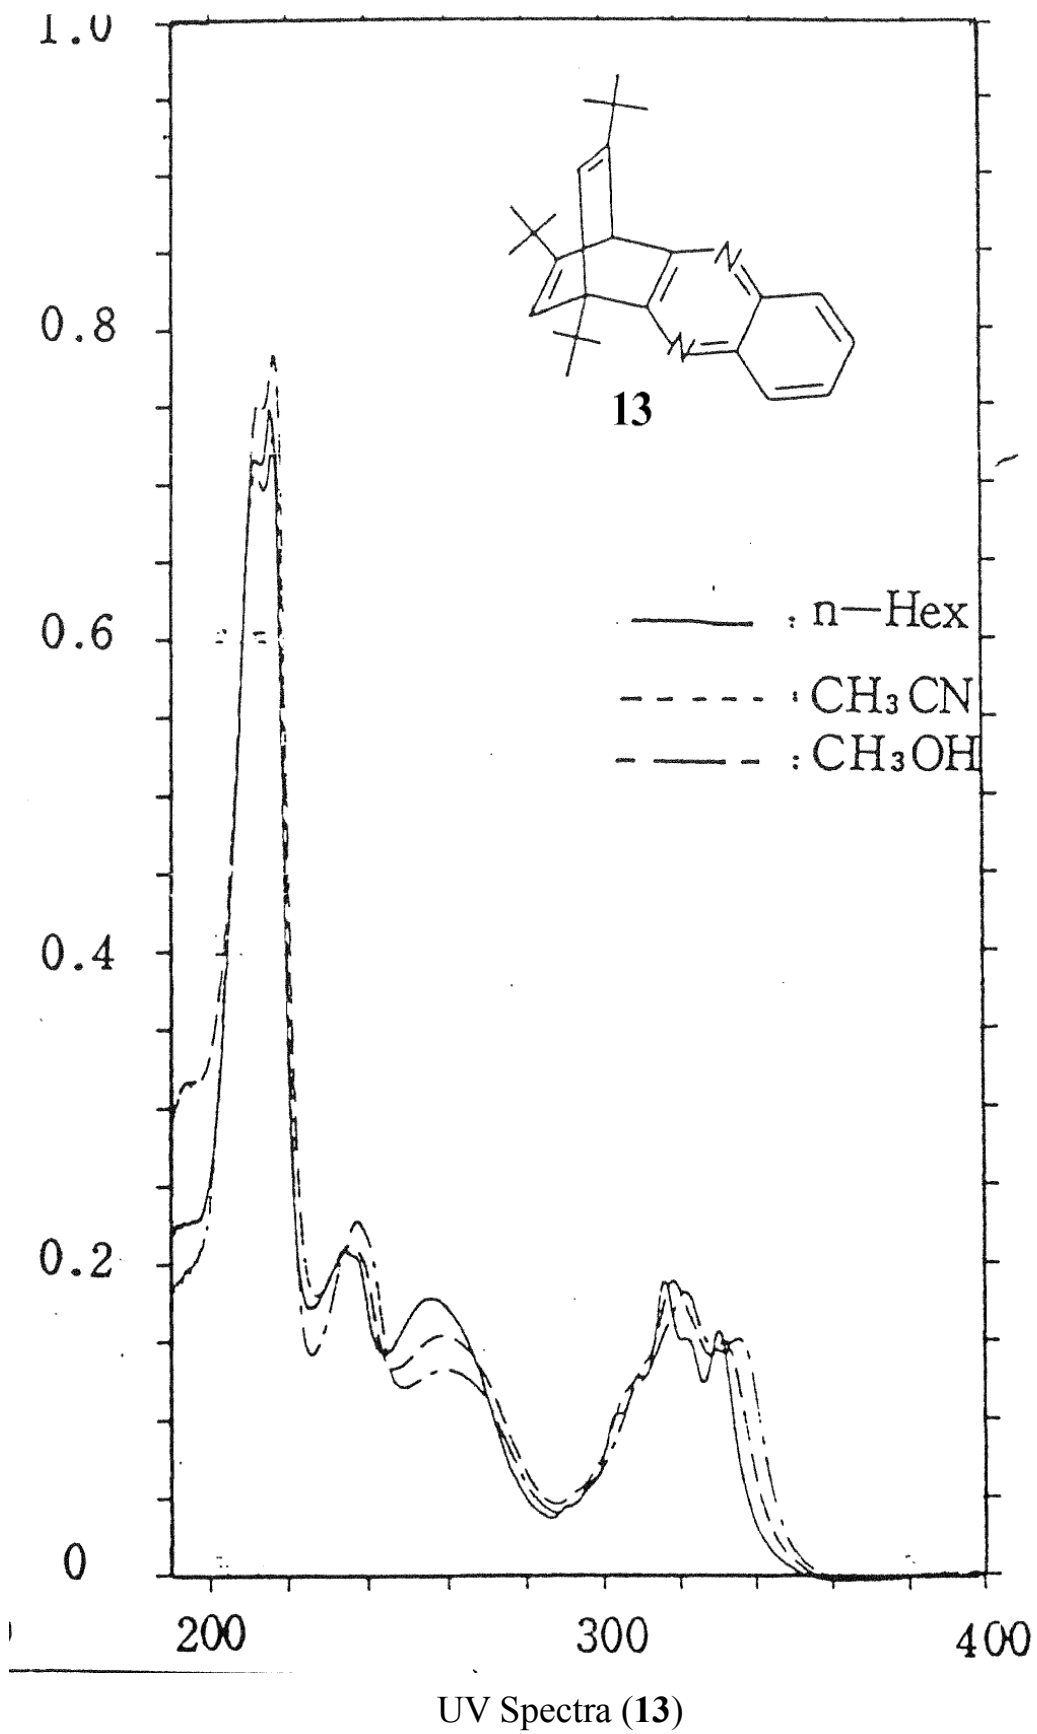

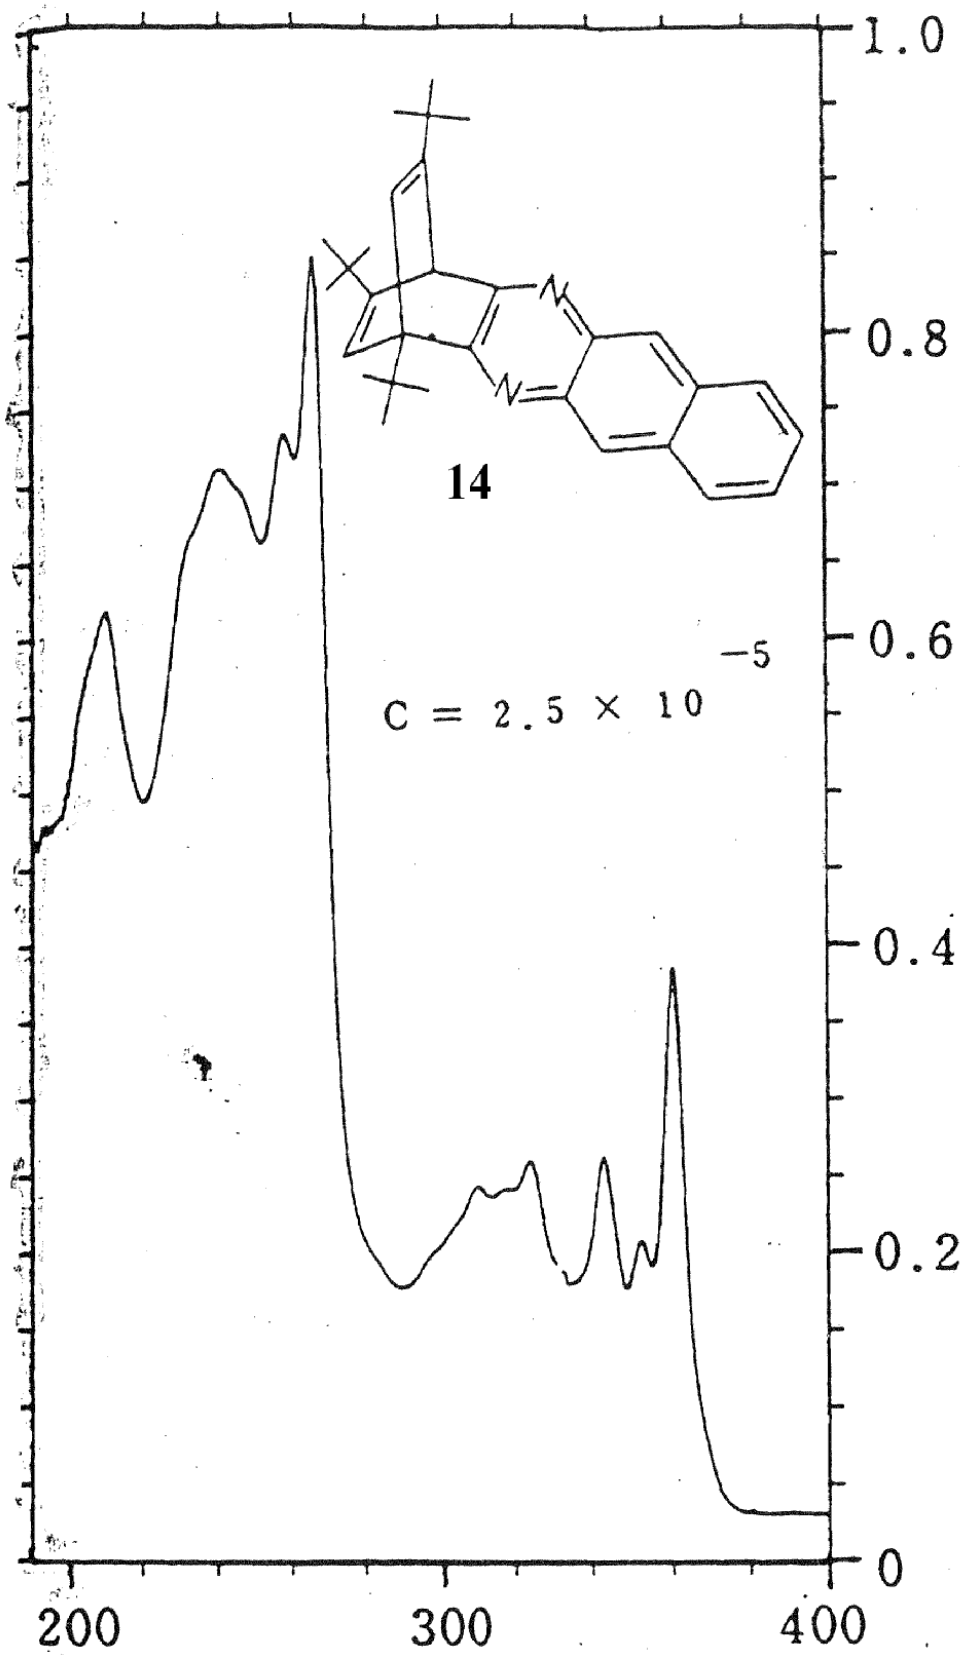

UV Spectra (14)

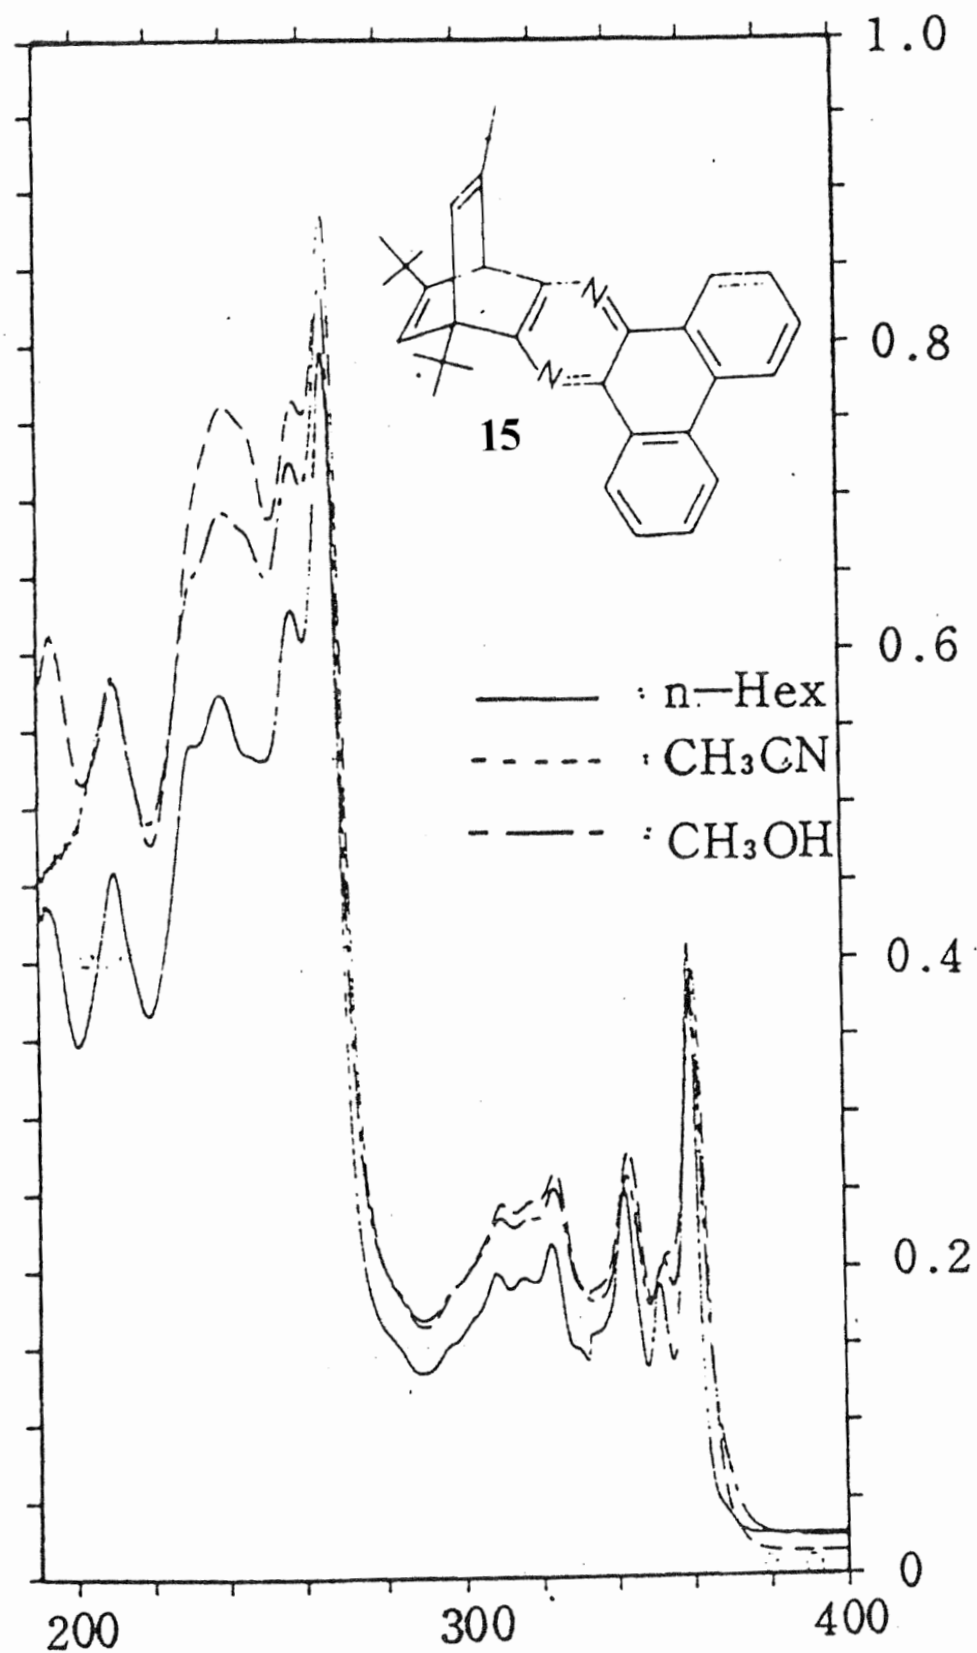

UV Spectra (**15**)



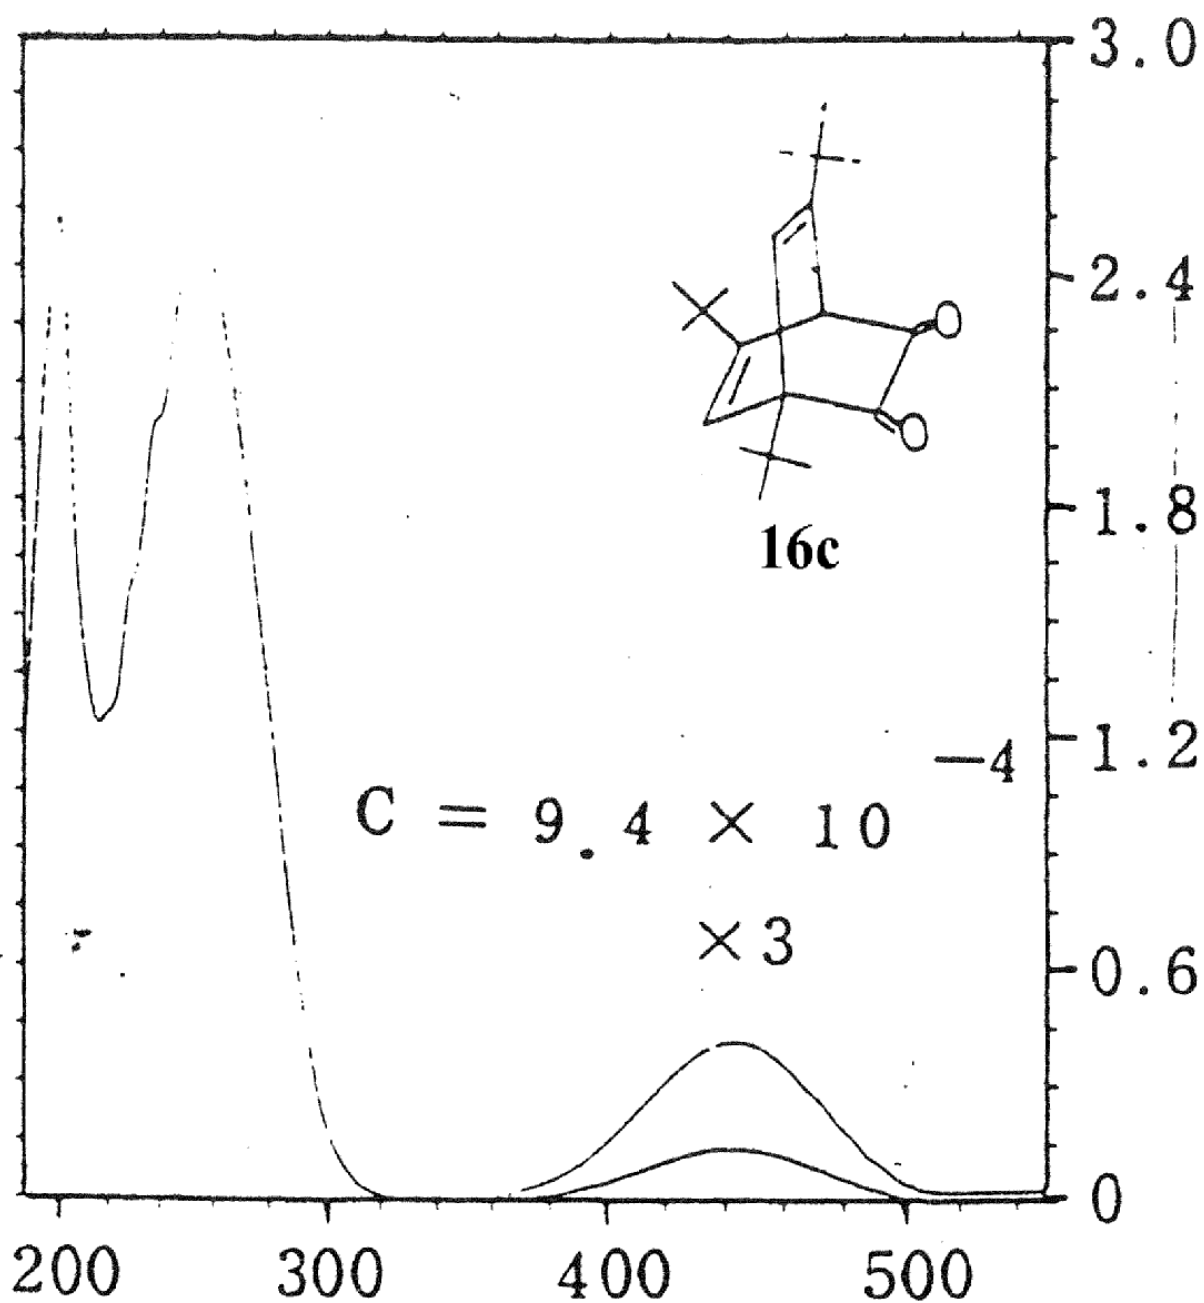

UV Spectra (16c)

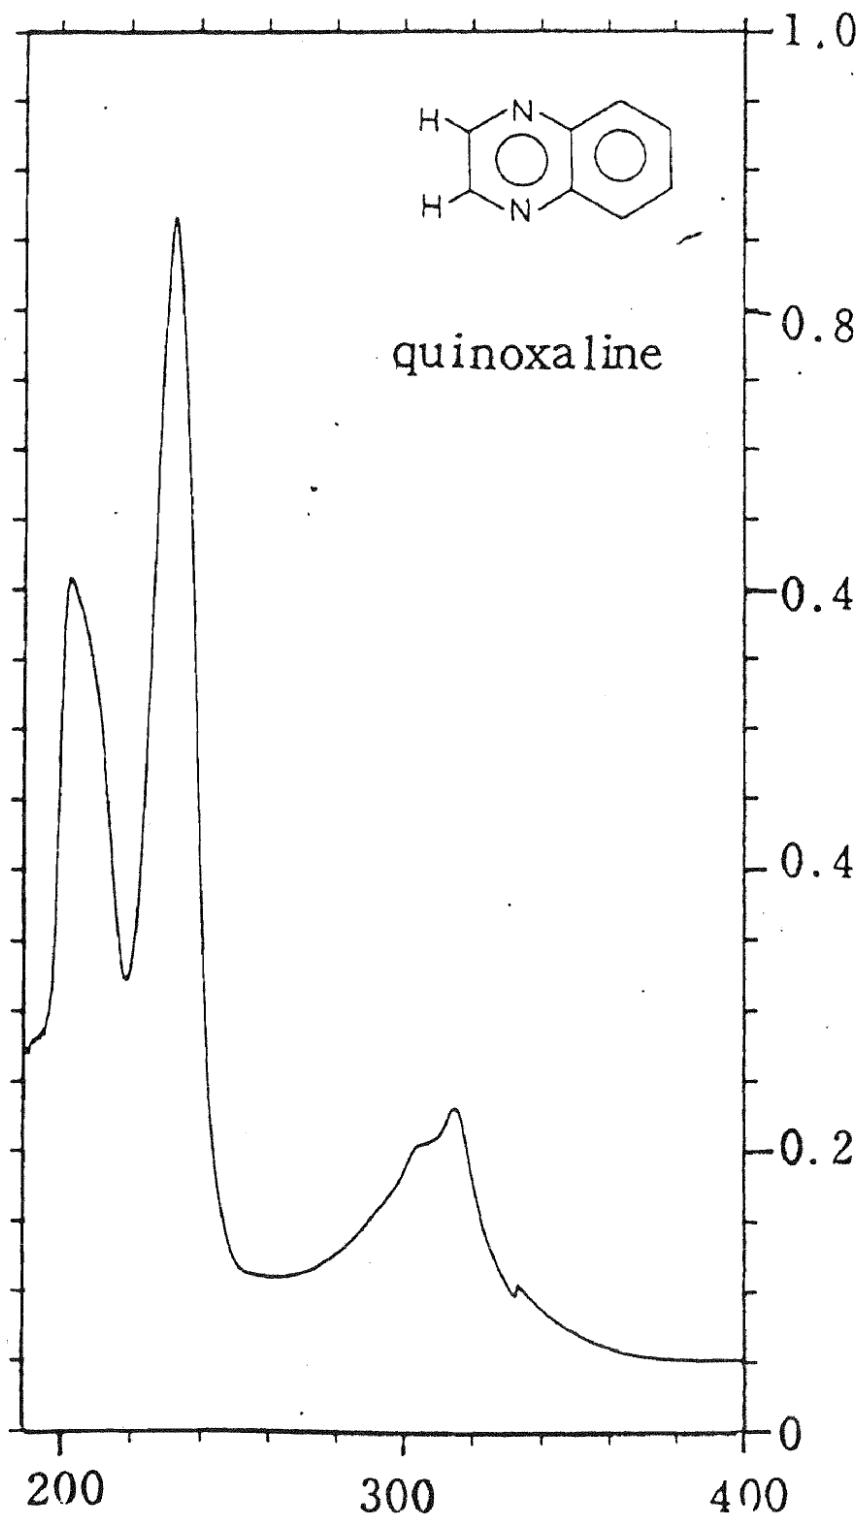

UV Spectra (Quinoxaline)

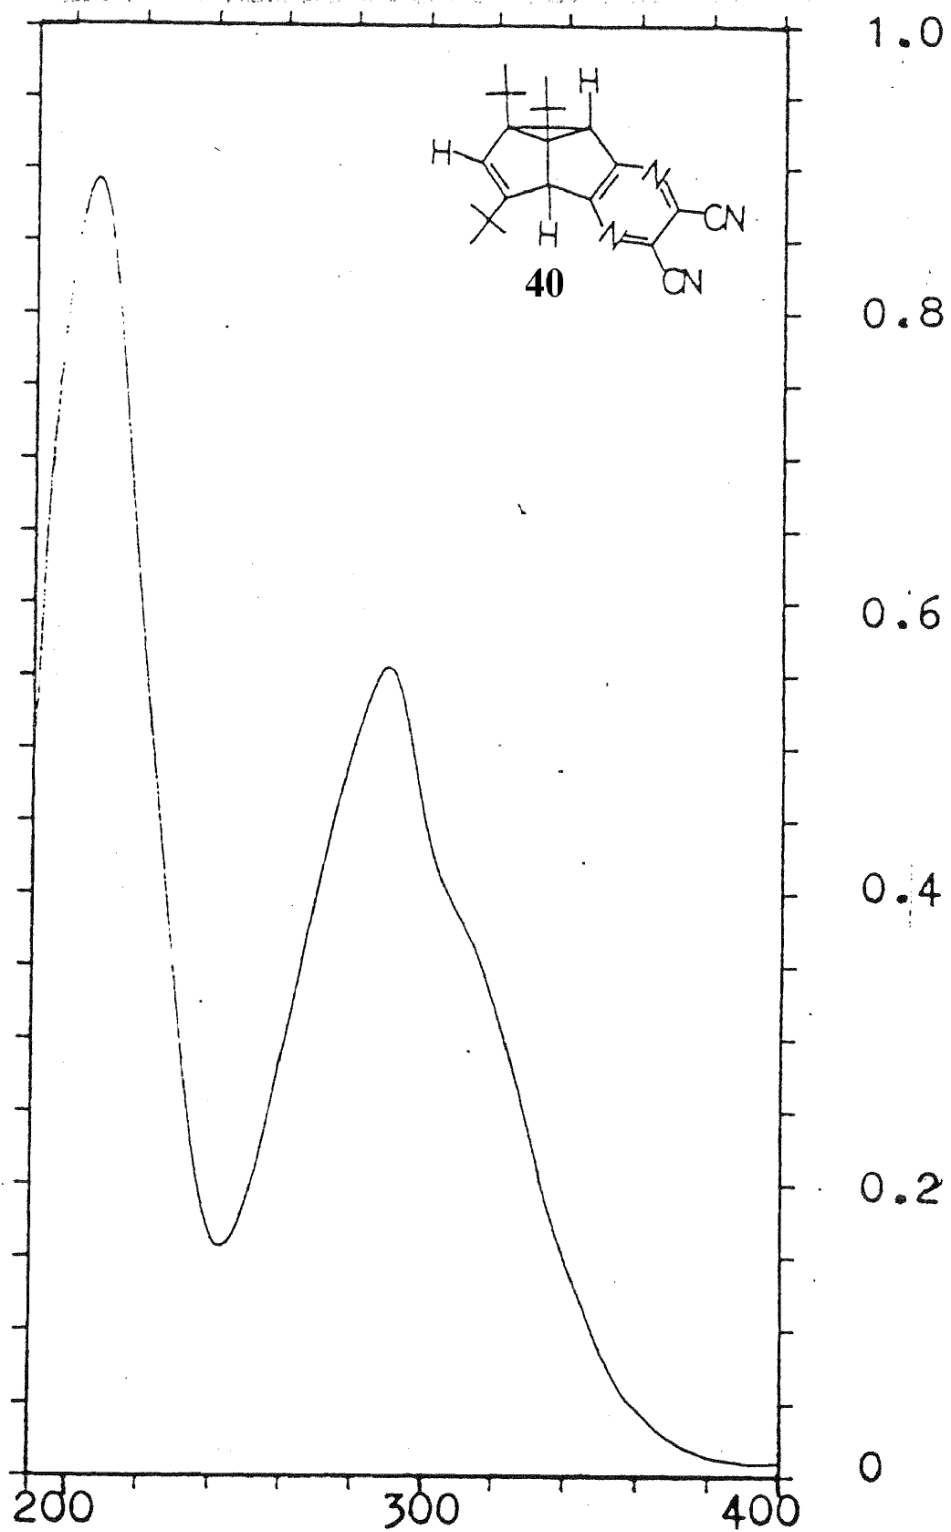

UV Spectra (40)

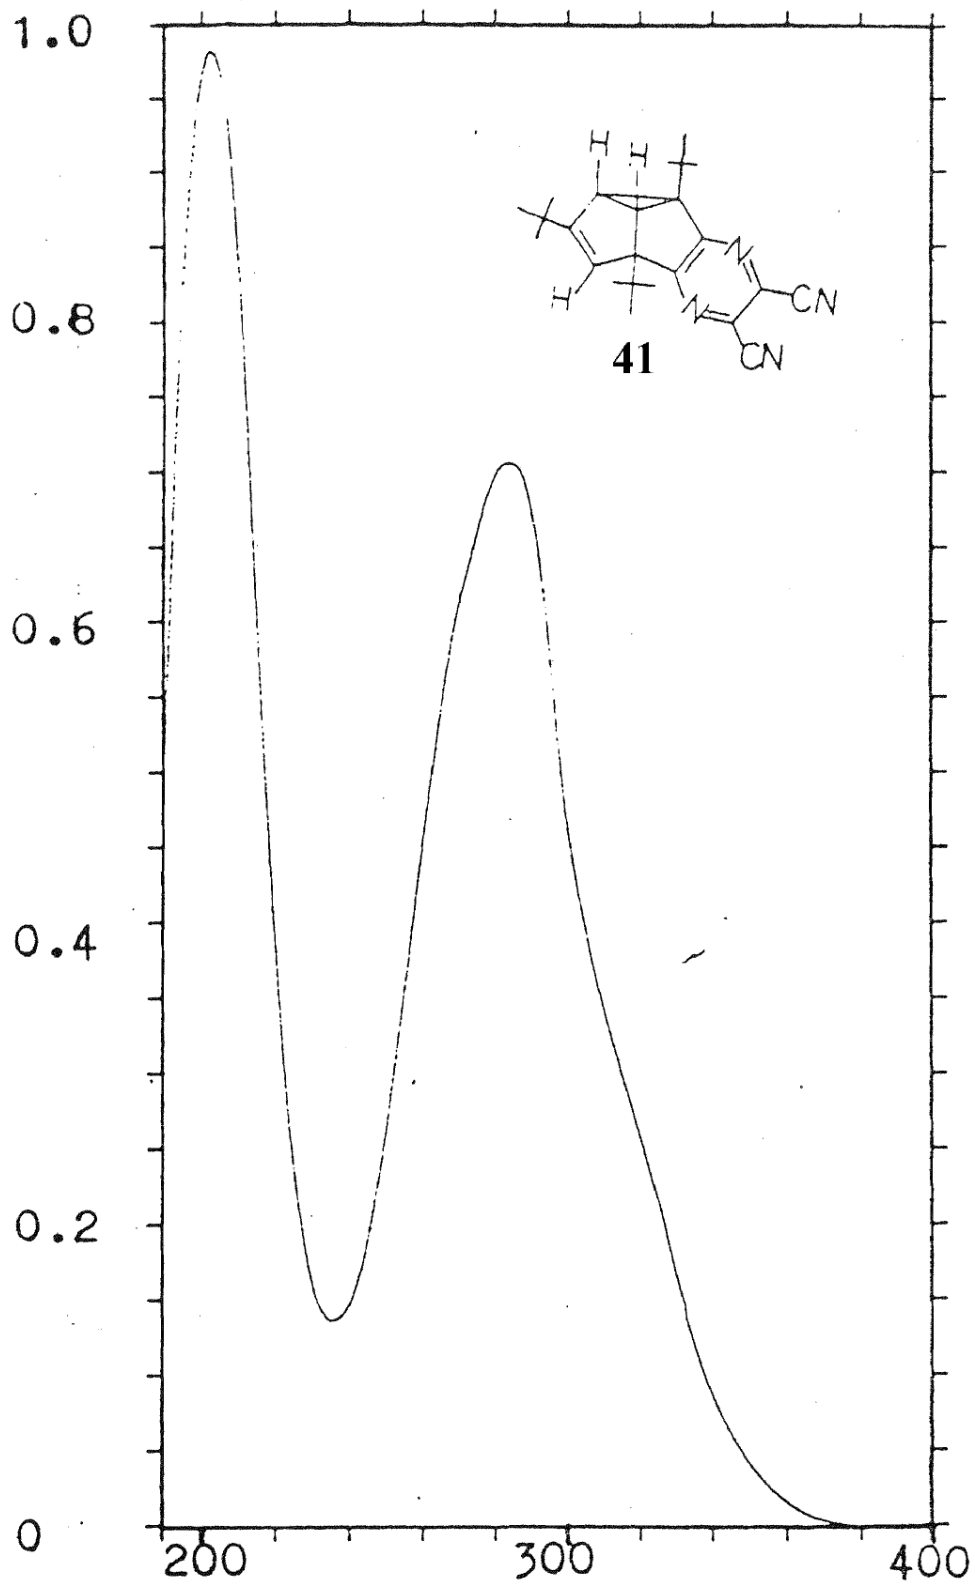

UV Spectra (41)

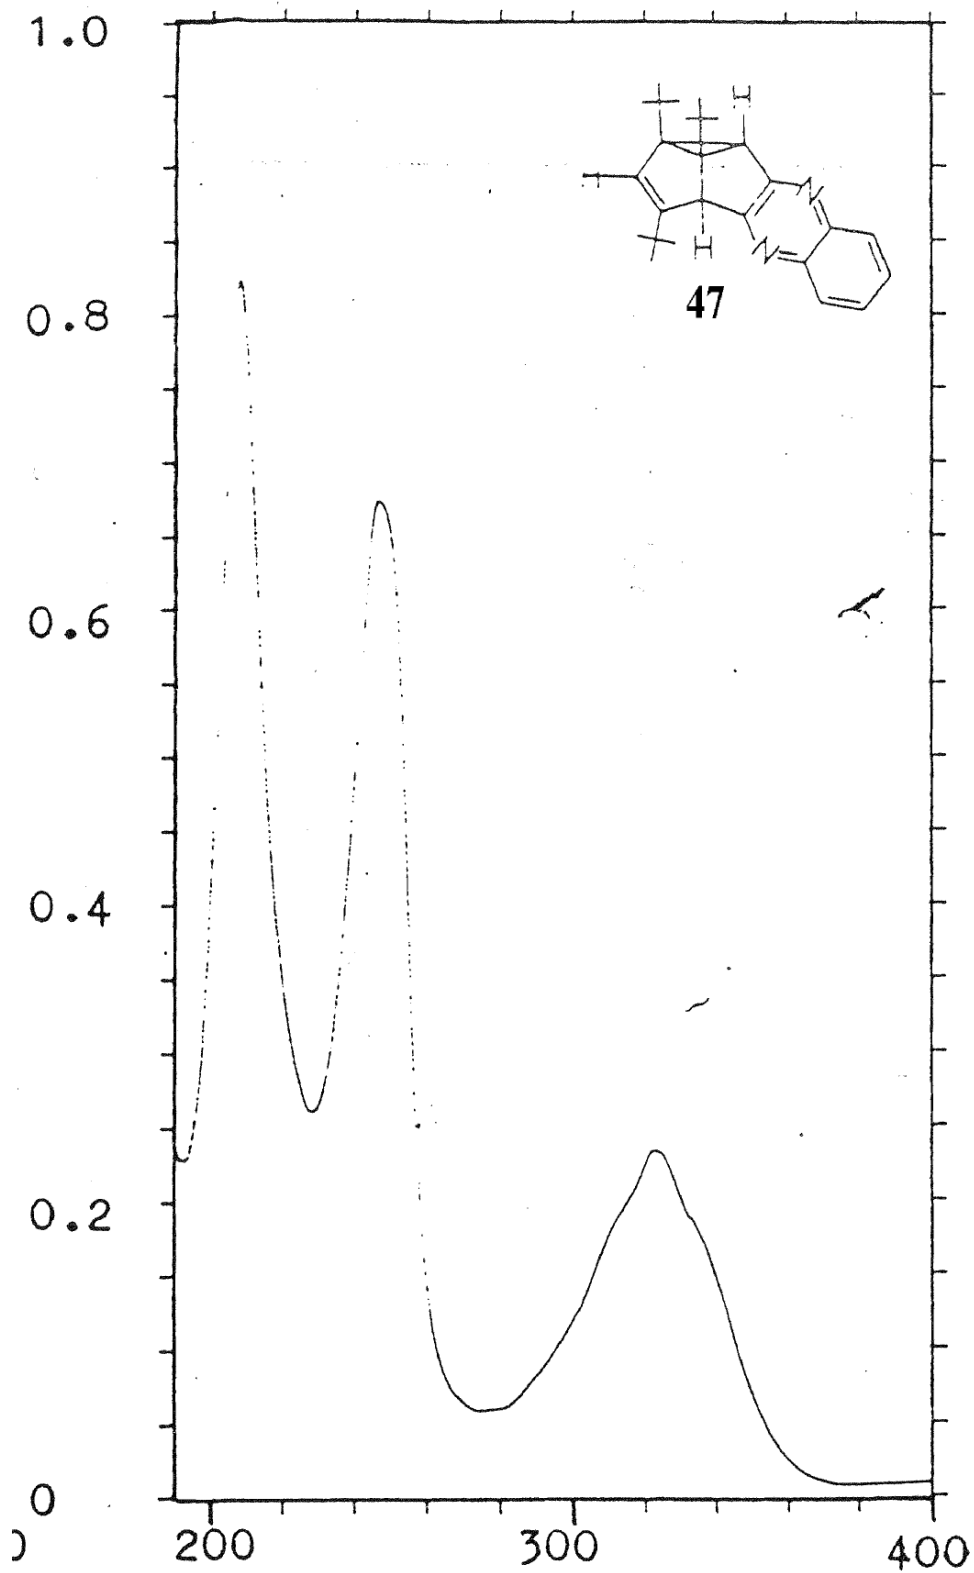

UV Spectra (47)

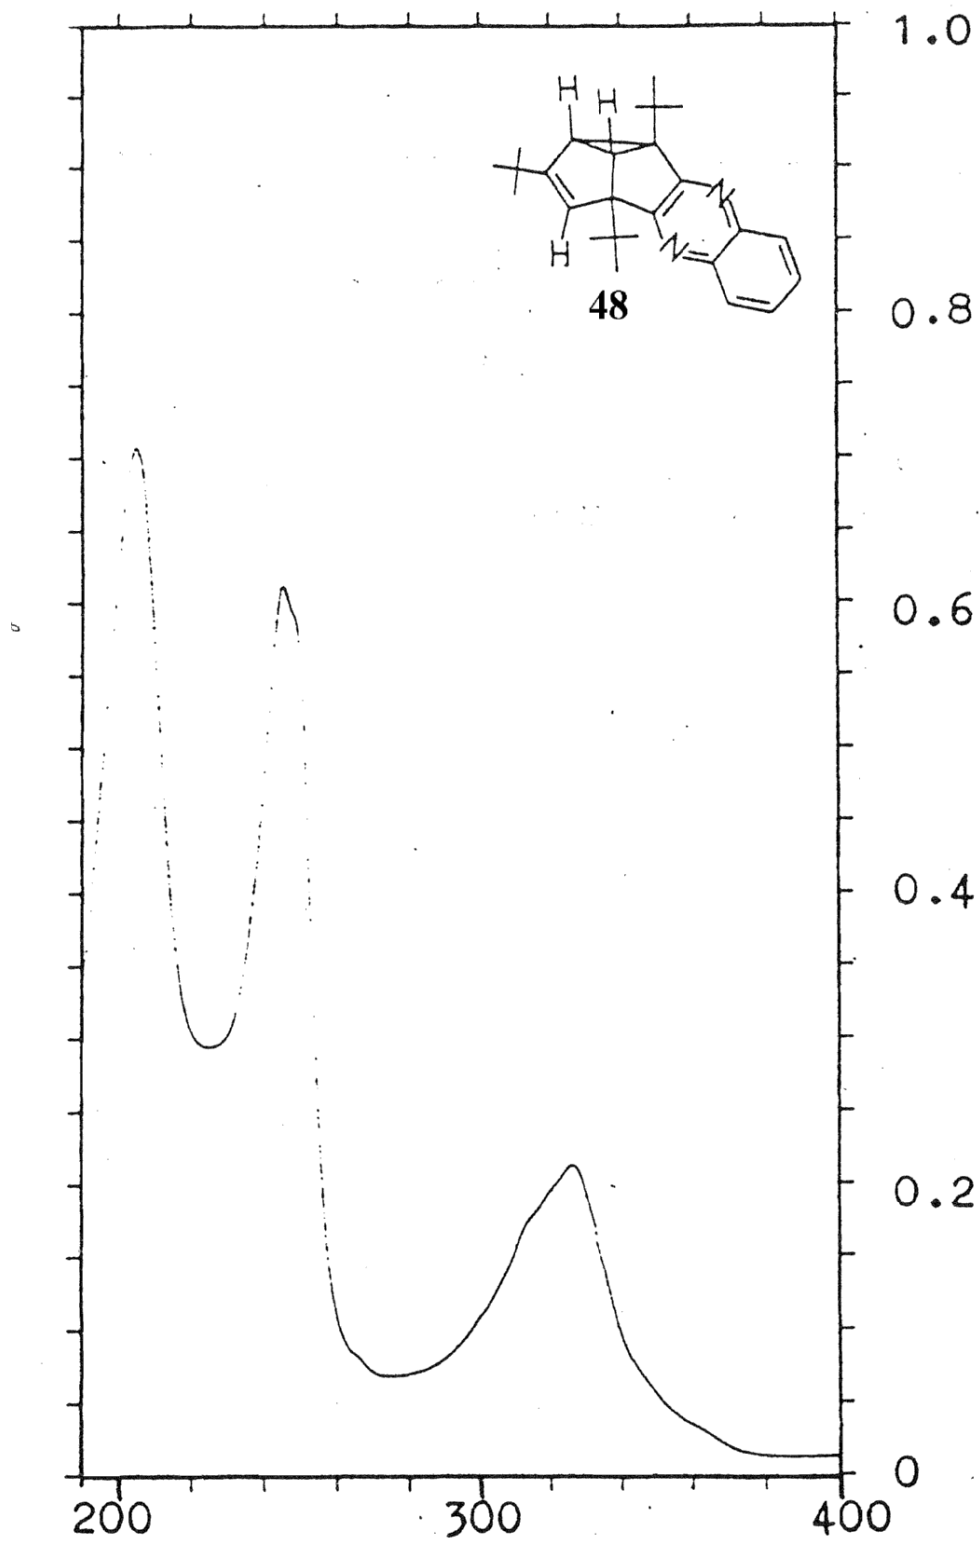

UV Spectra (48)

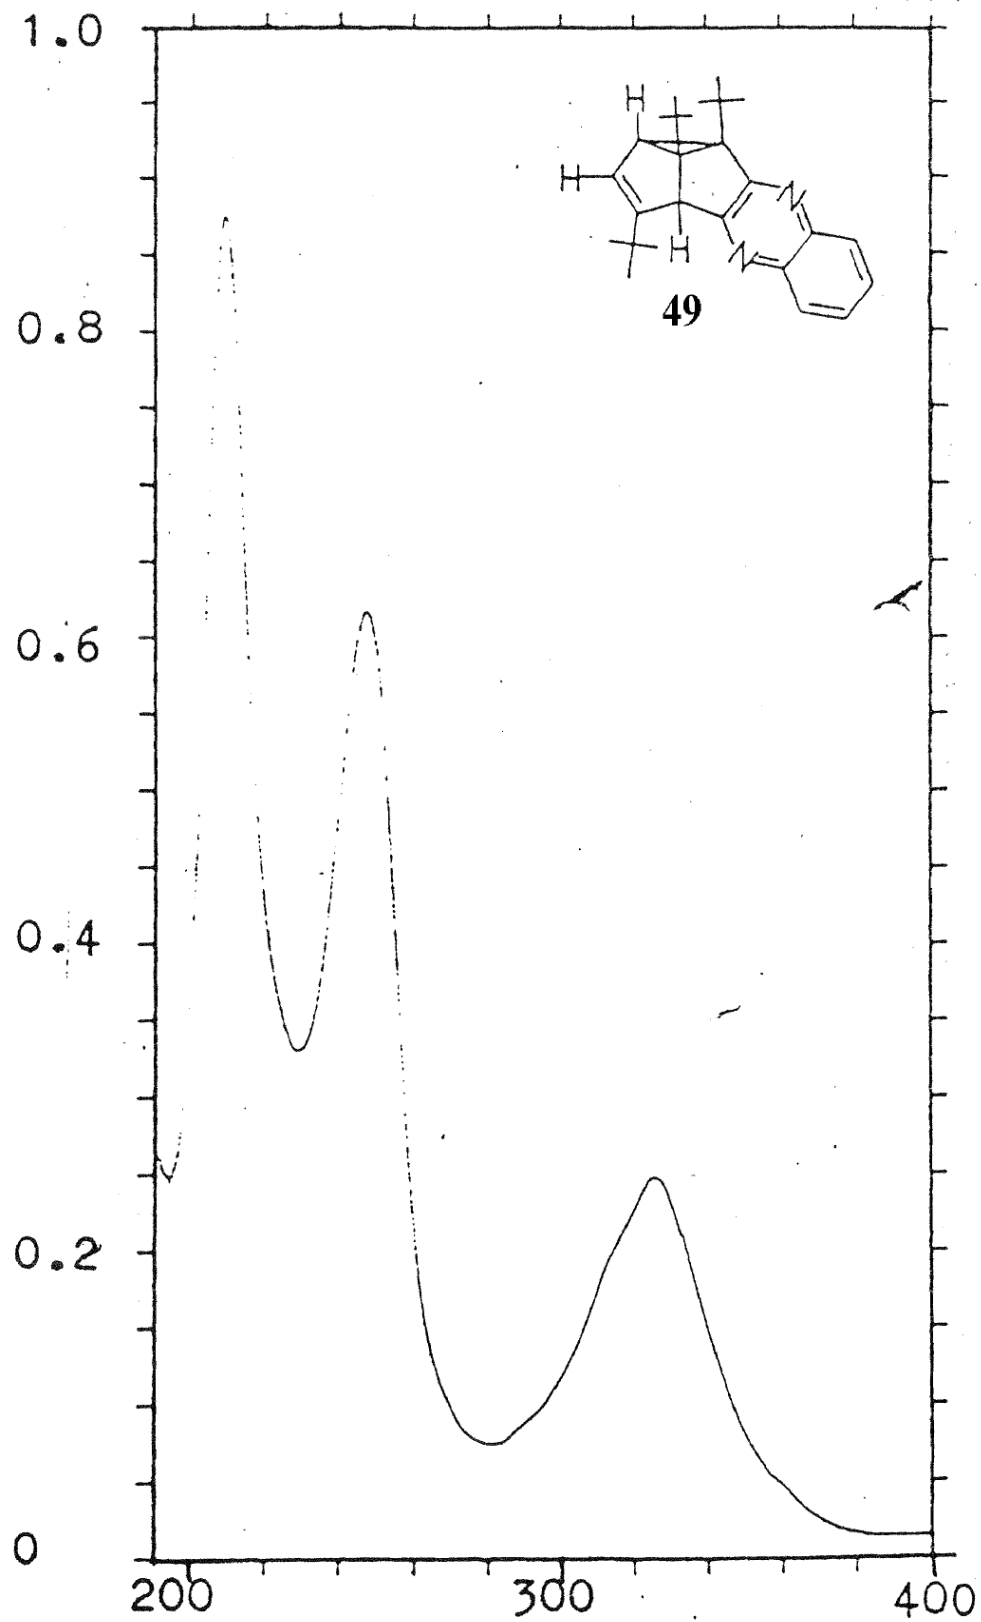

UV Spectra (49)

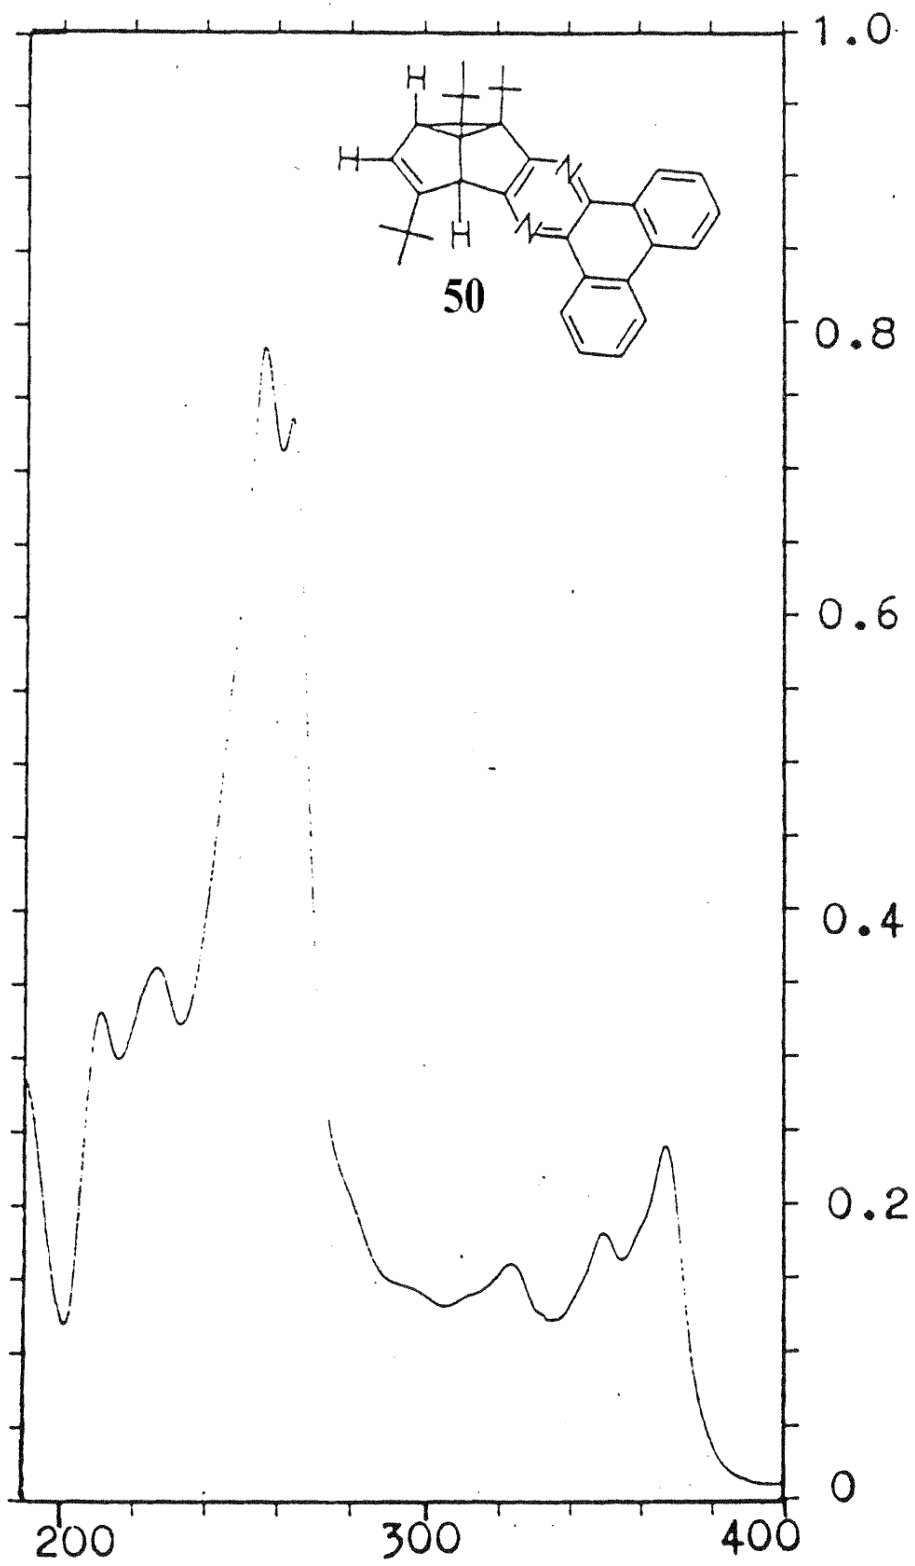

UV Spectra (**50**)



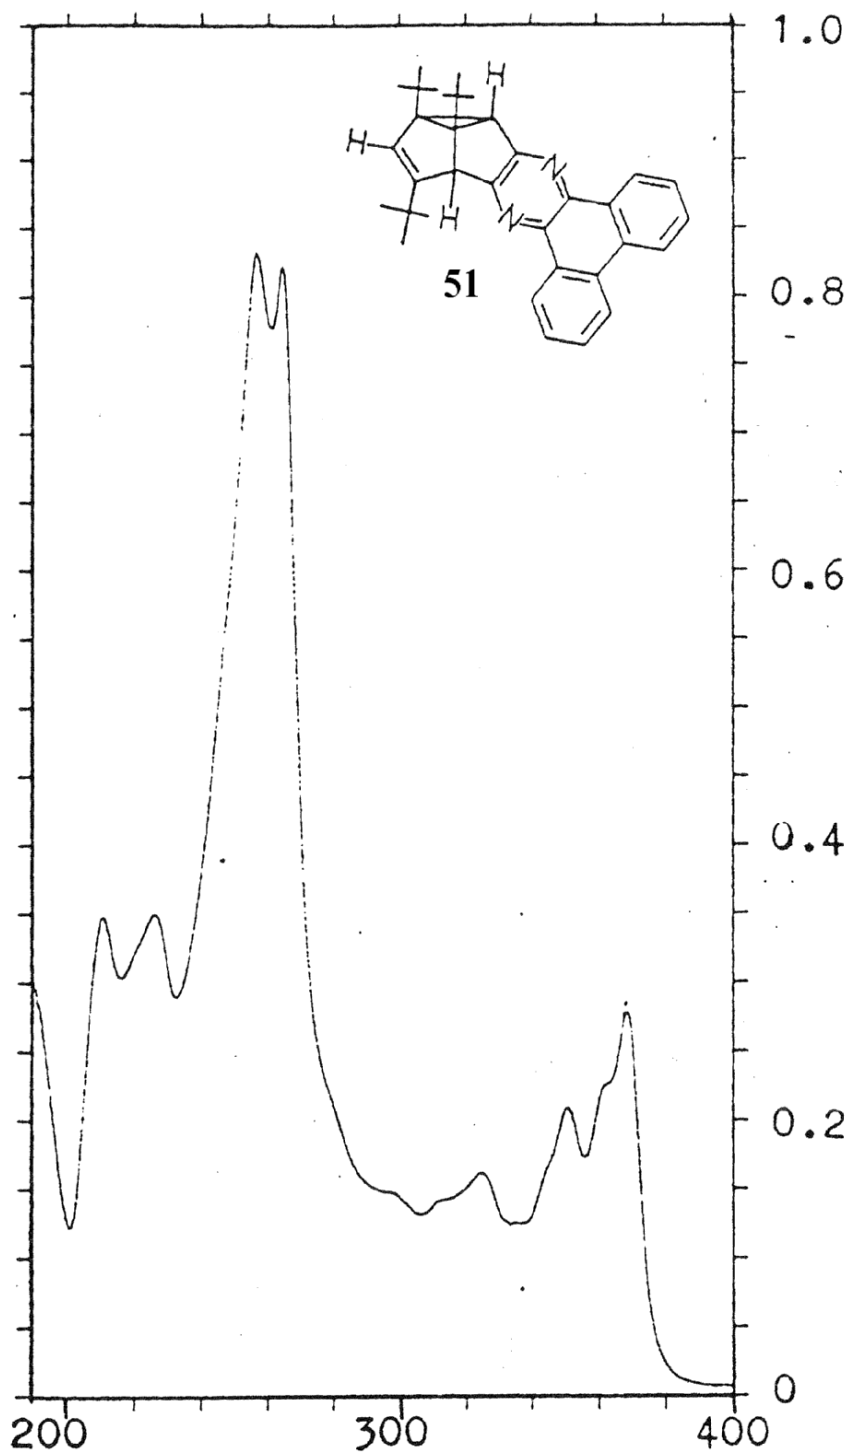

UV Spectra (**51**)

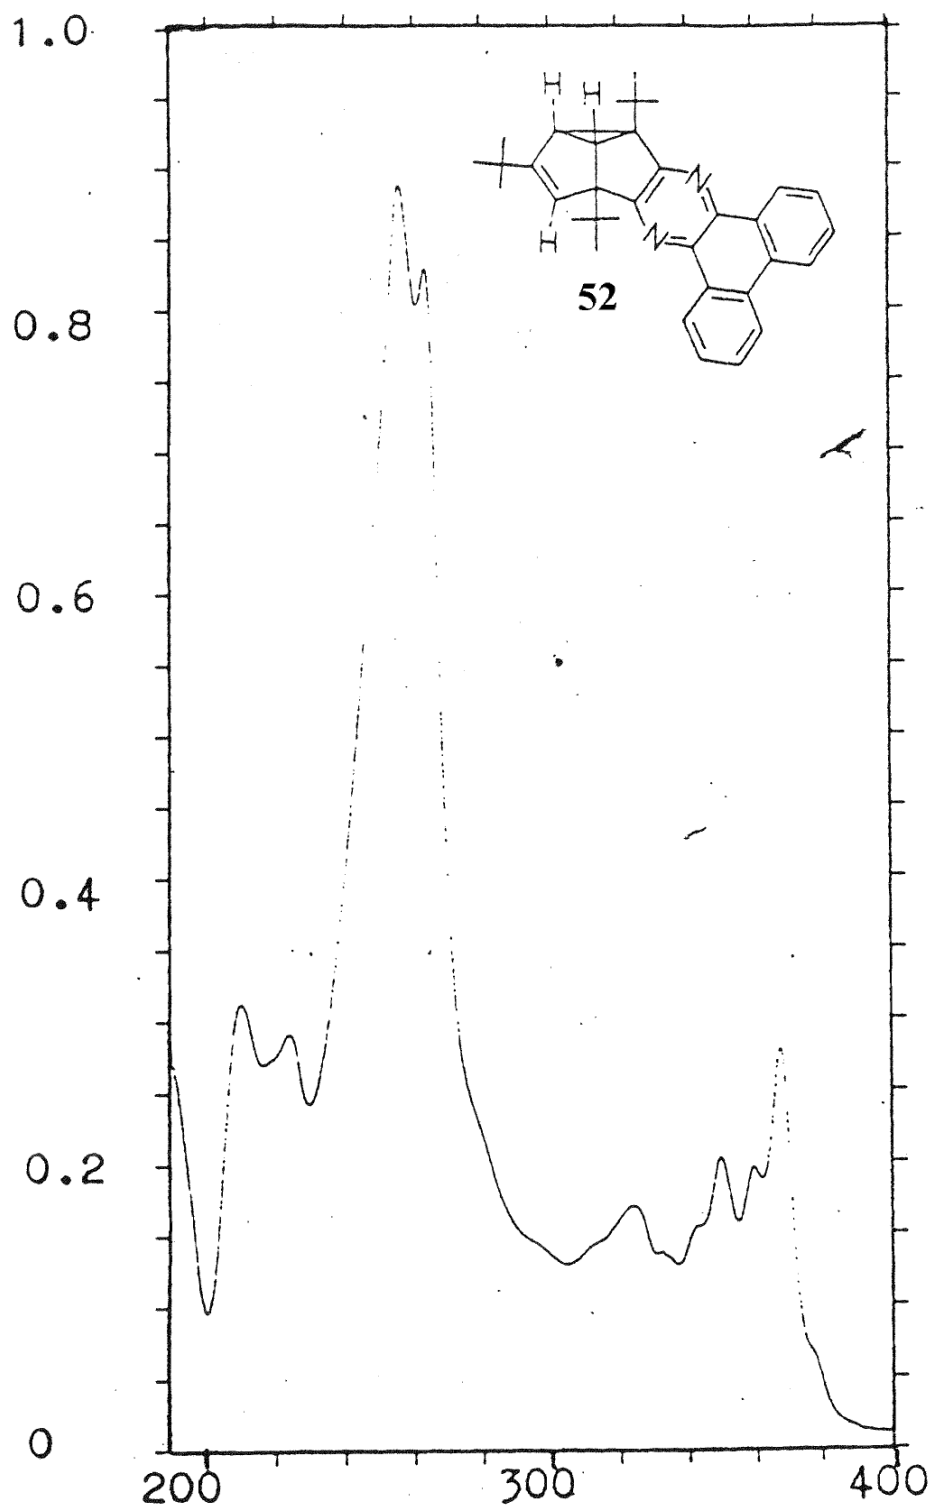

UV Spectra (52)

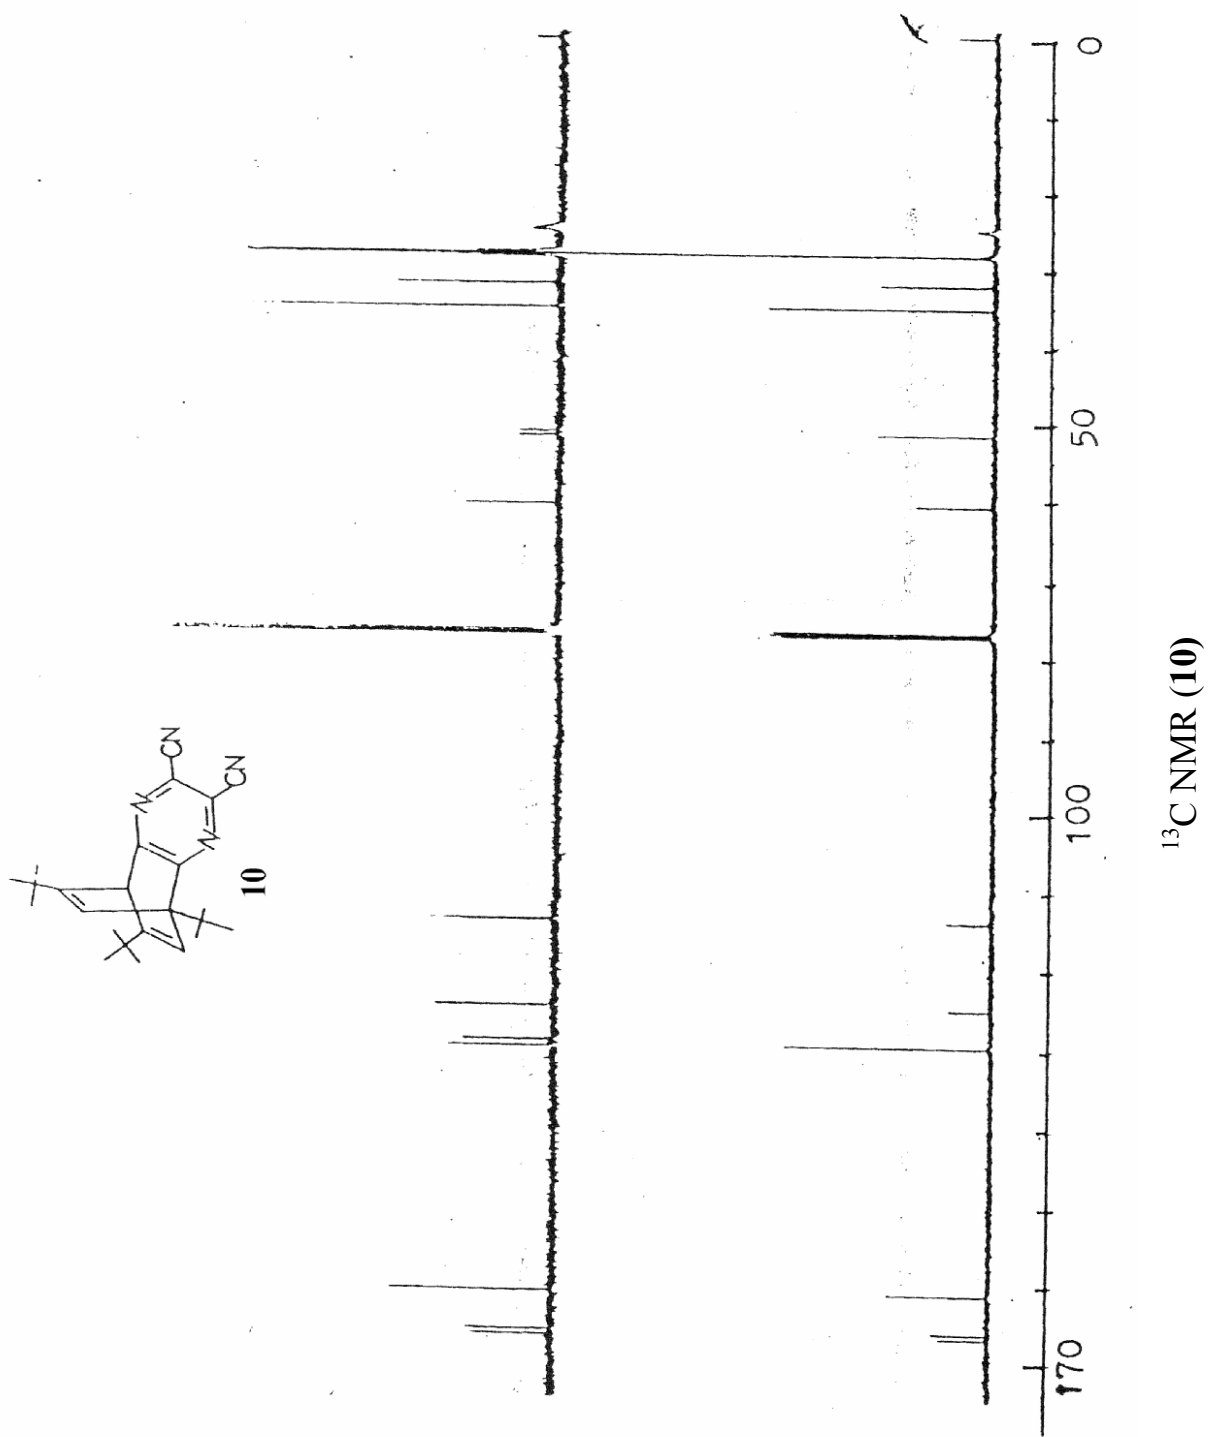

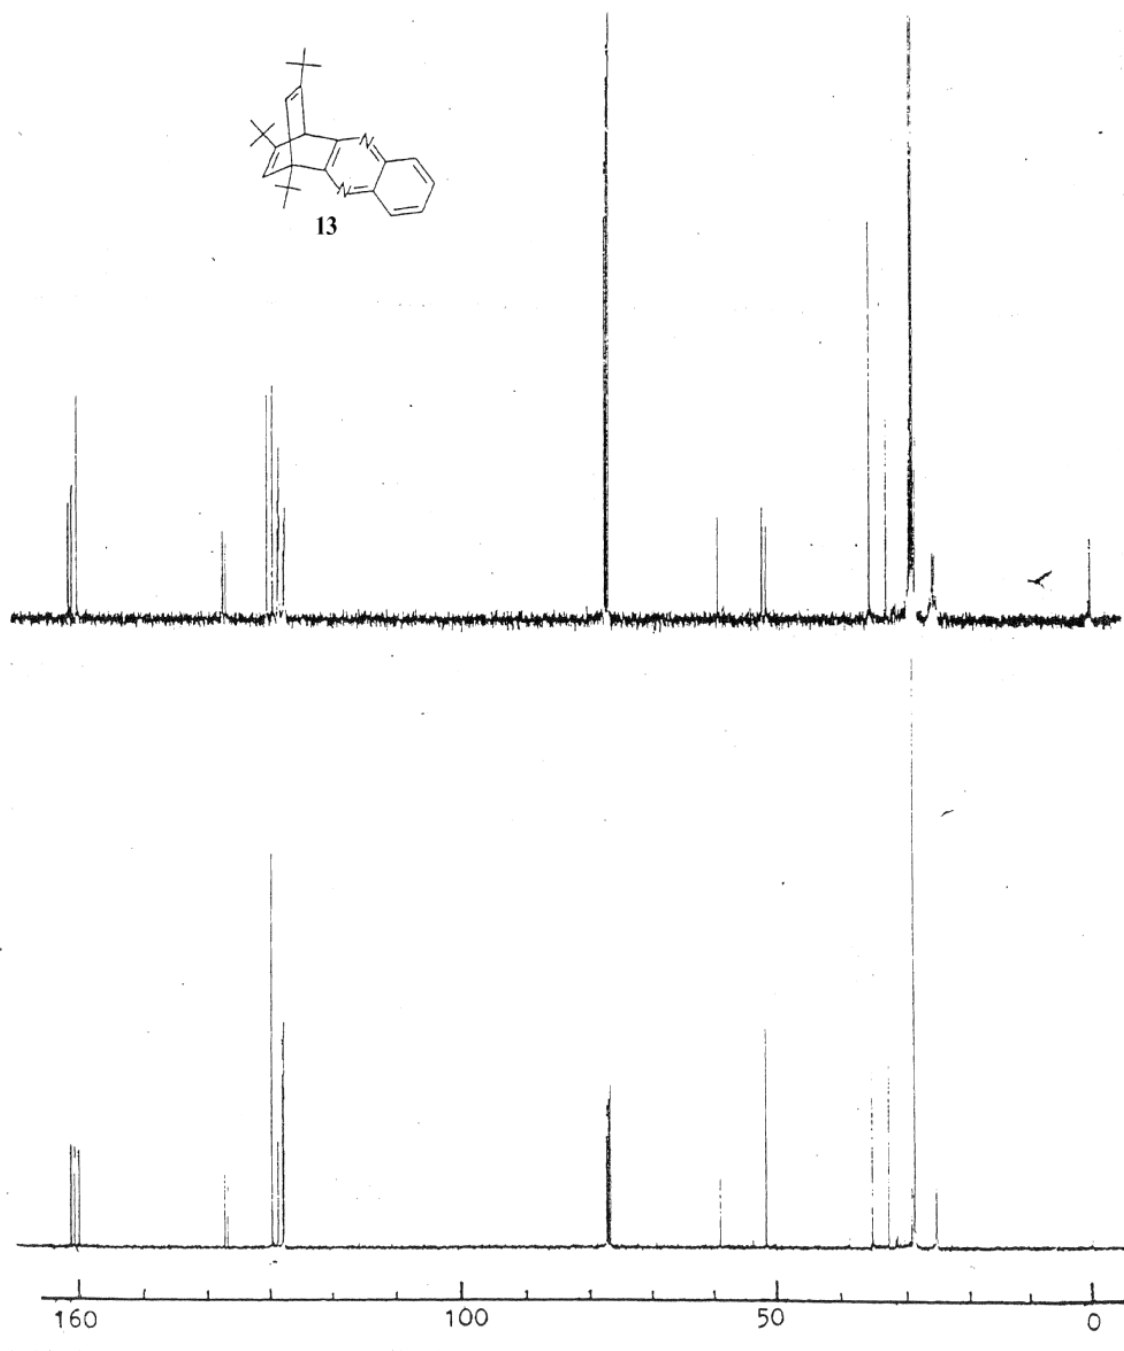

$^{13}\text{C}$  NMR (**13**)

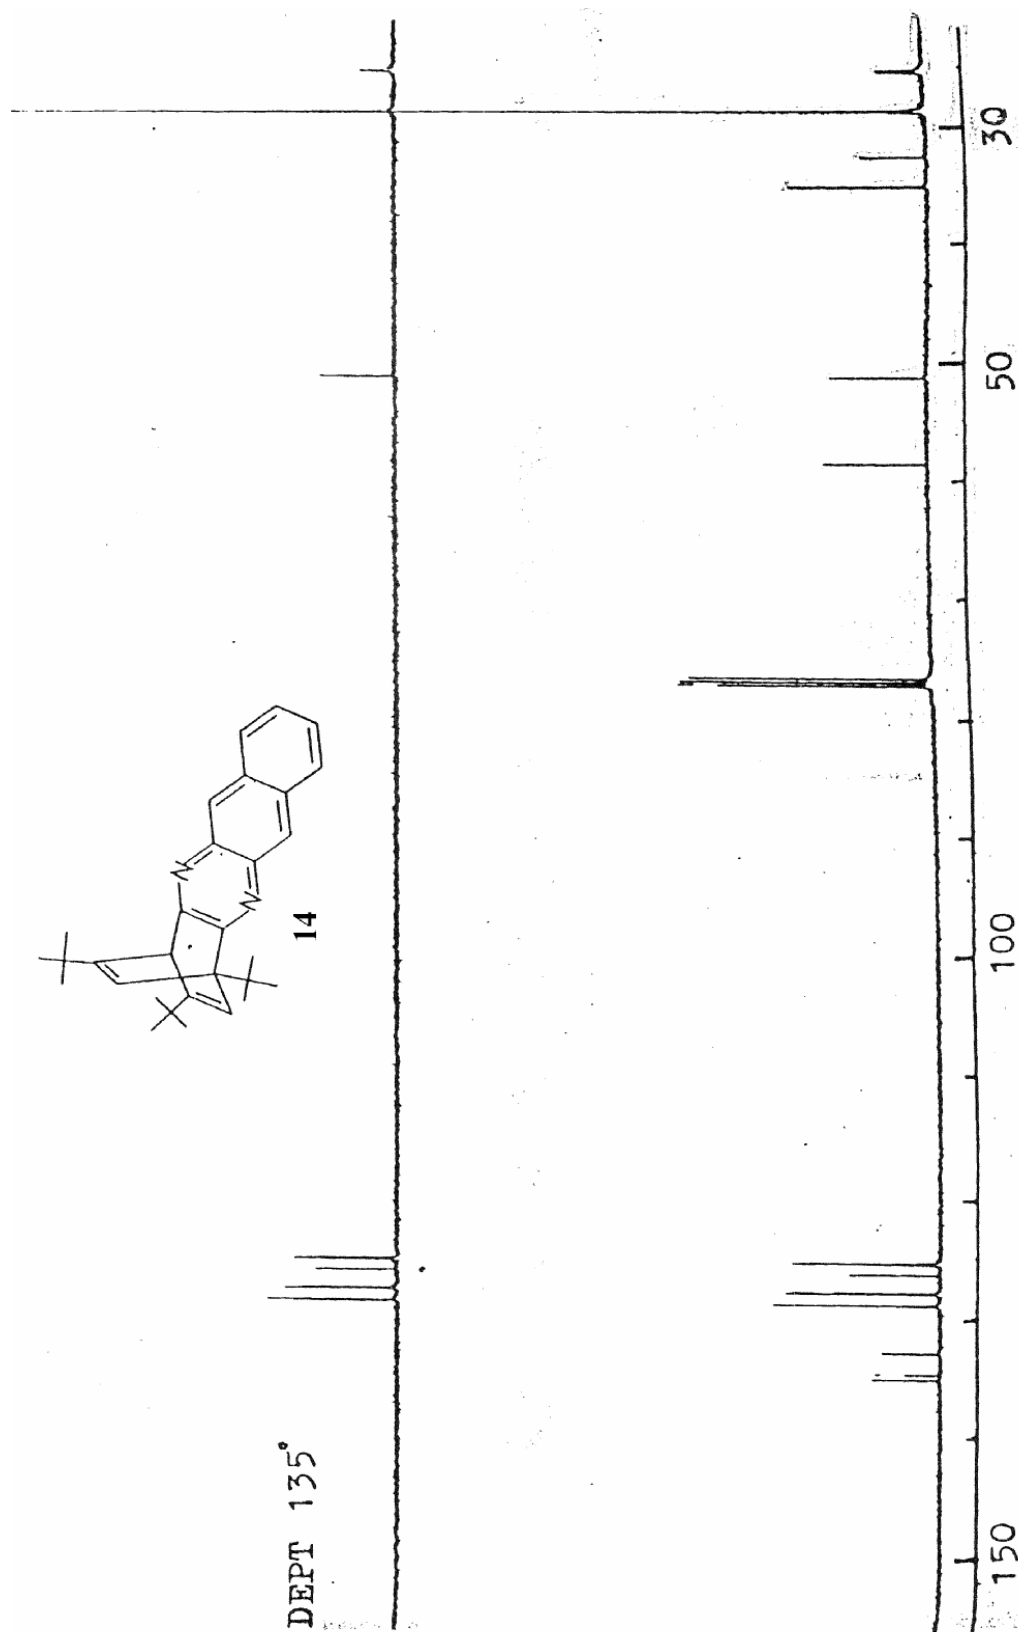

<sup>13</sup>C NMR (14)

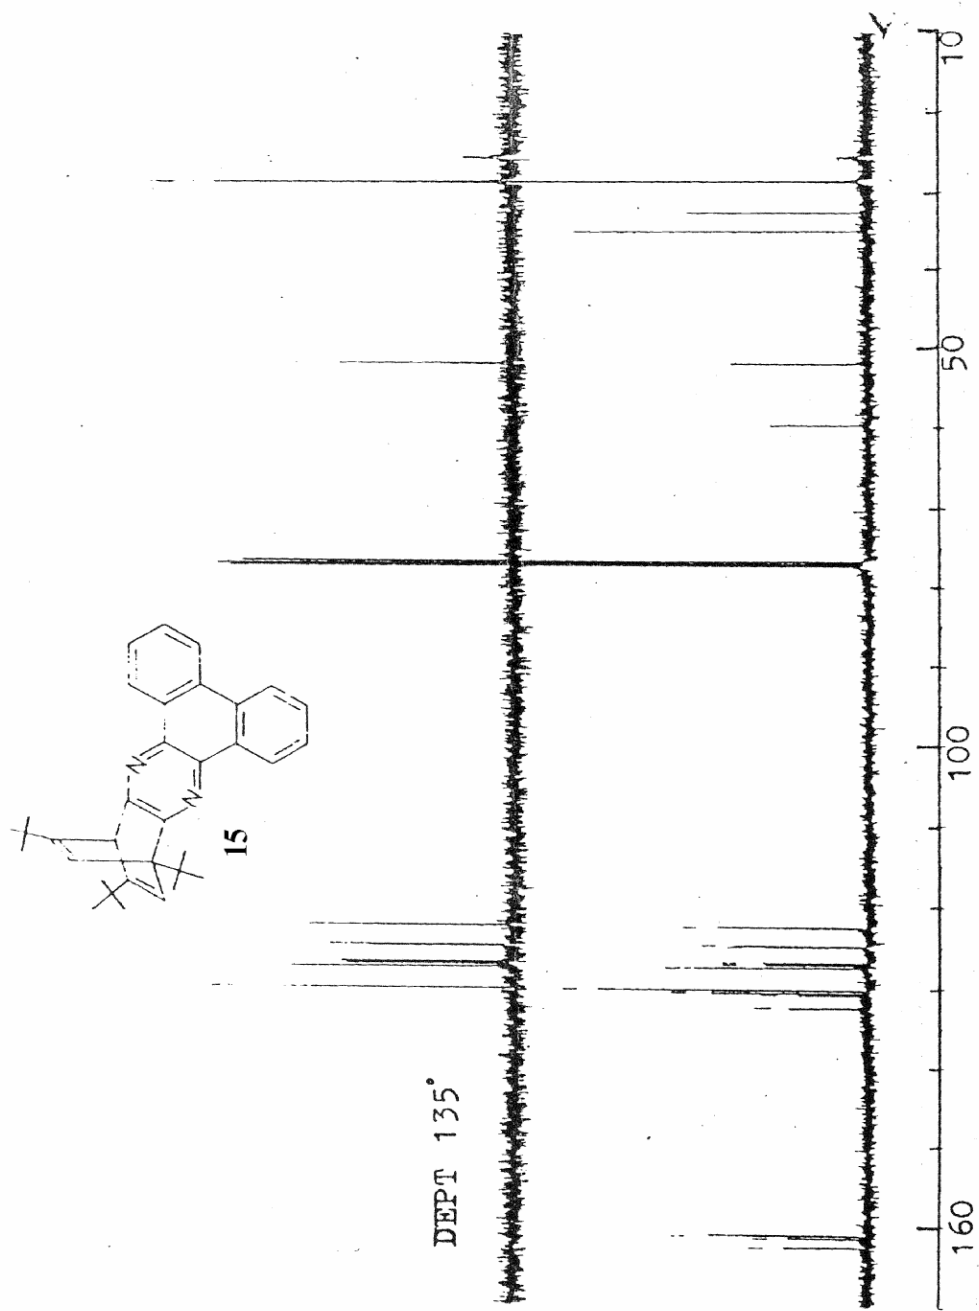

$^{13}\text{C}$  NMR (15)

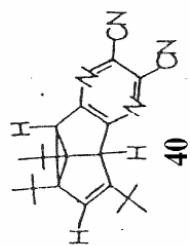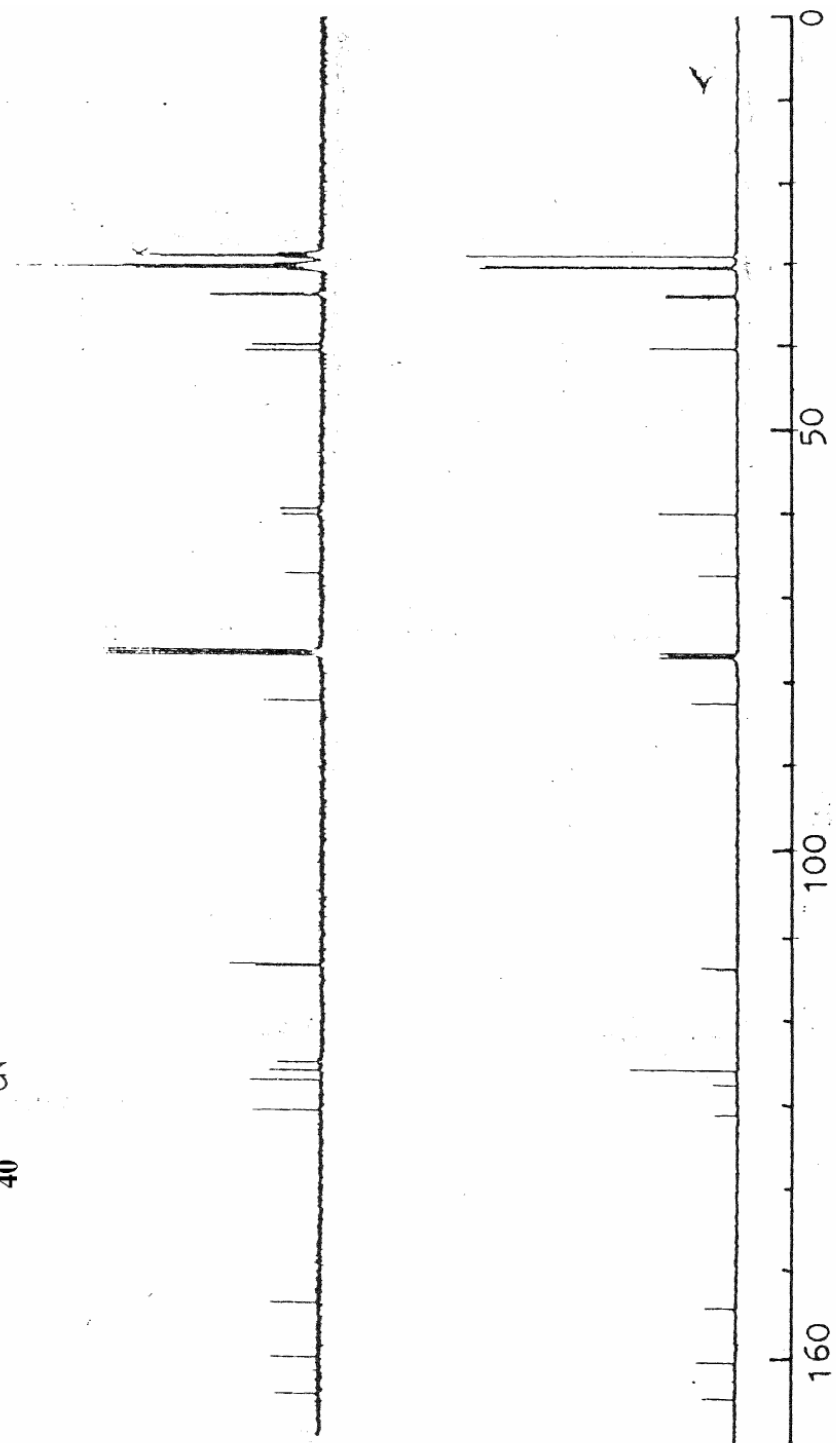

<sup>13</sup>C NMR (40)

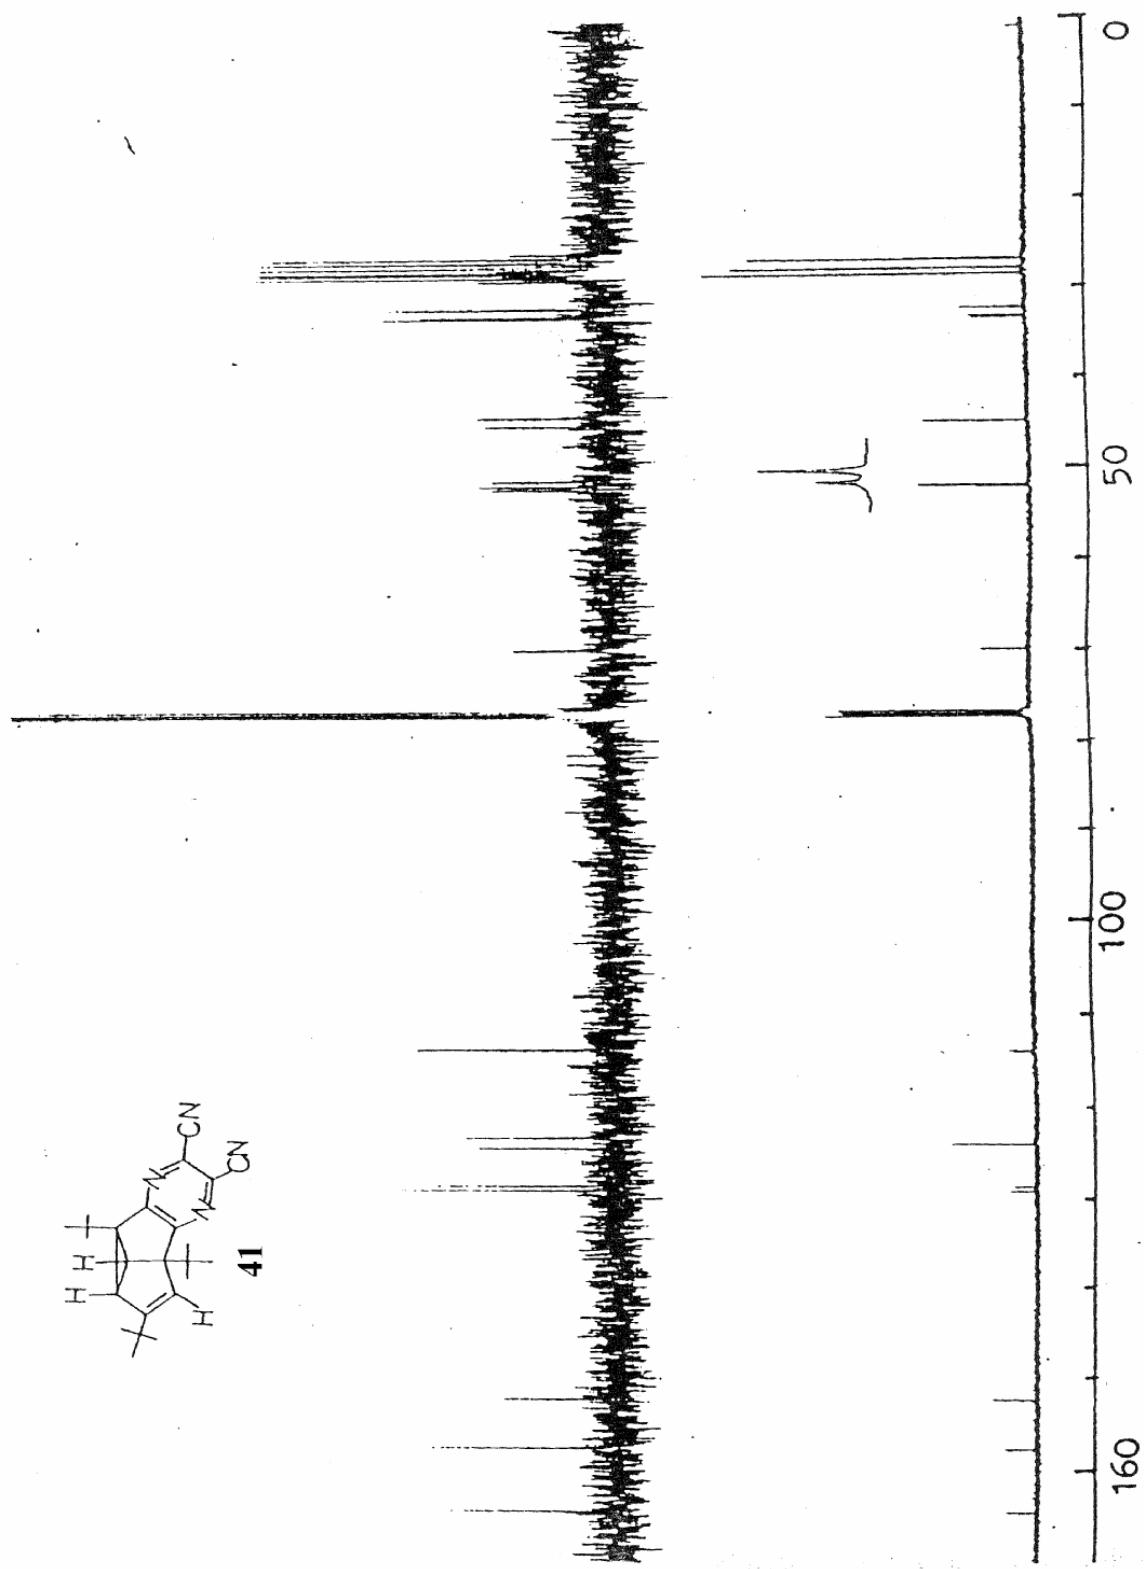

$^{13}\text{C}$  NMR (41)



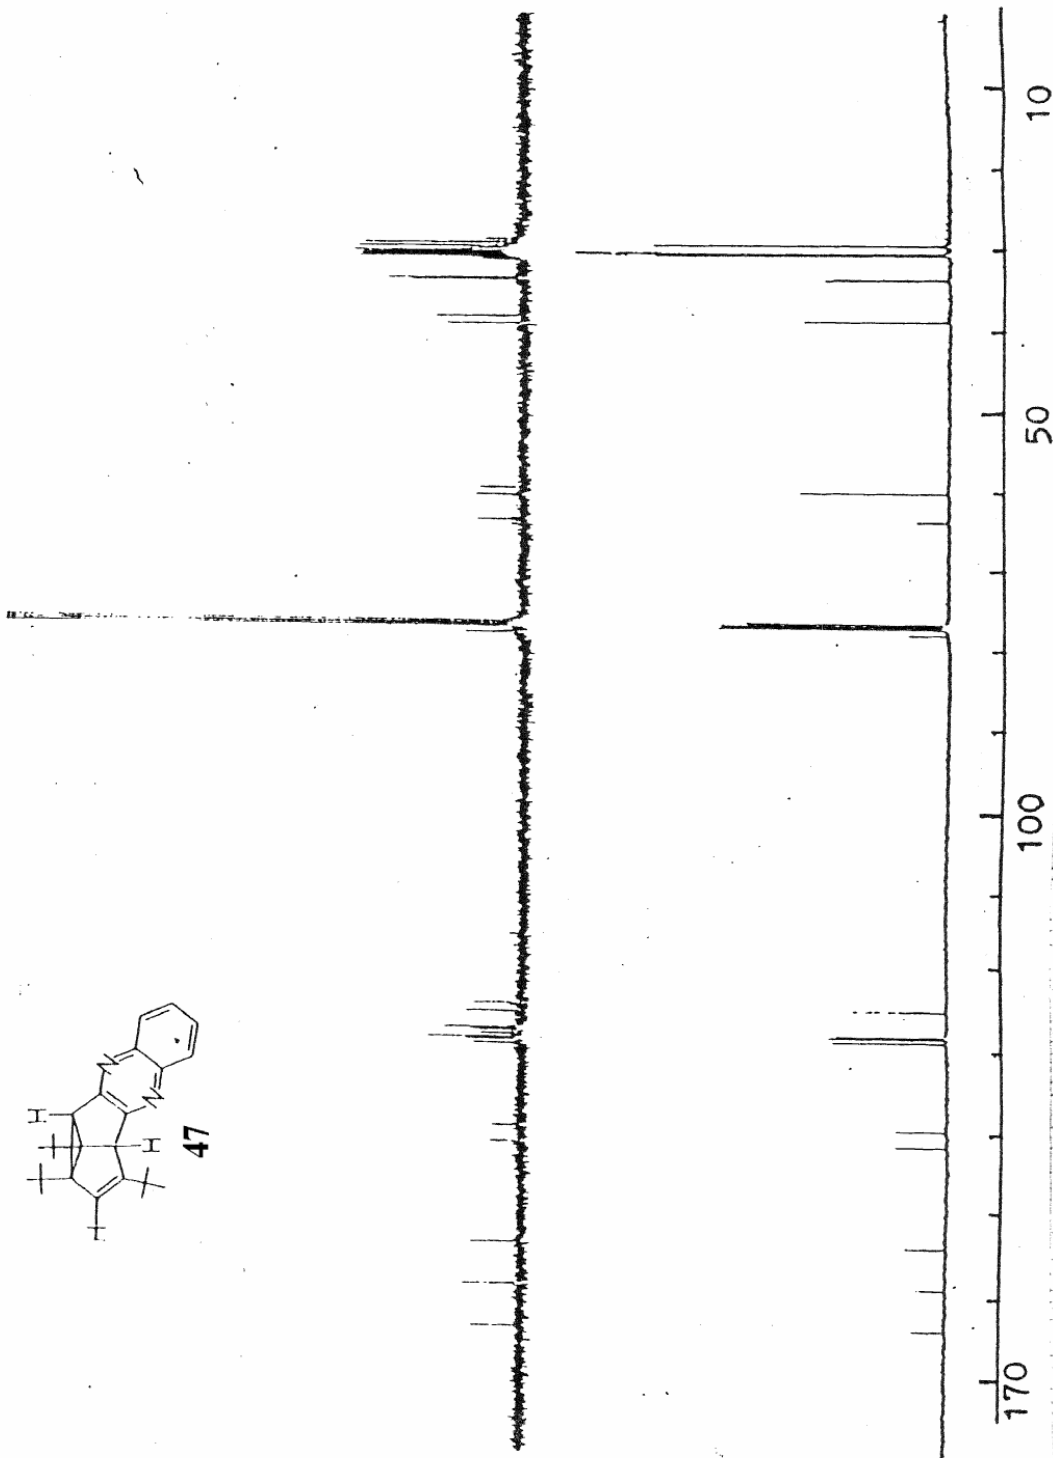

$^{13}\text{C}$  NMR (47)

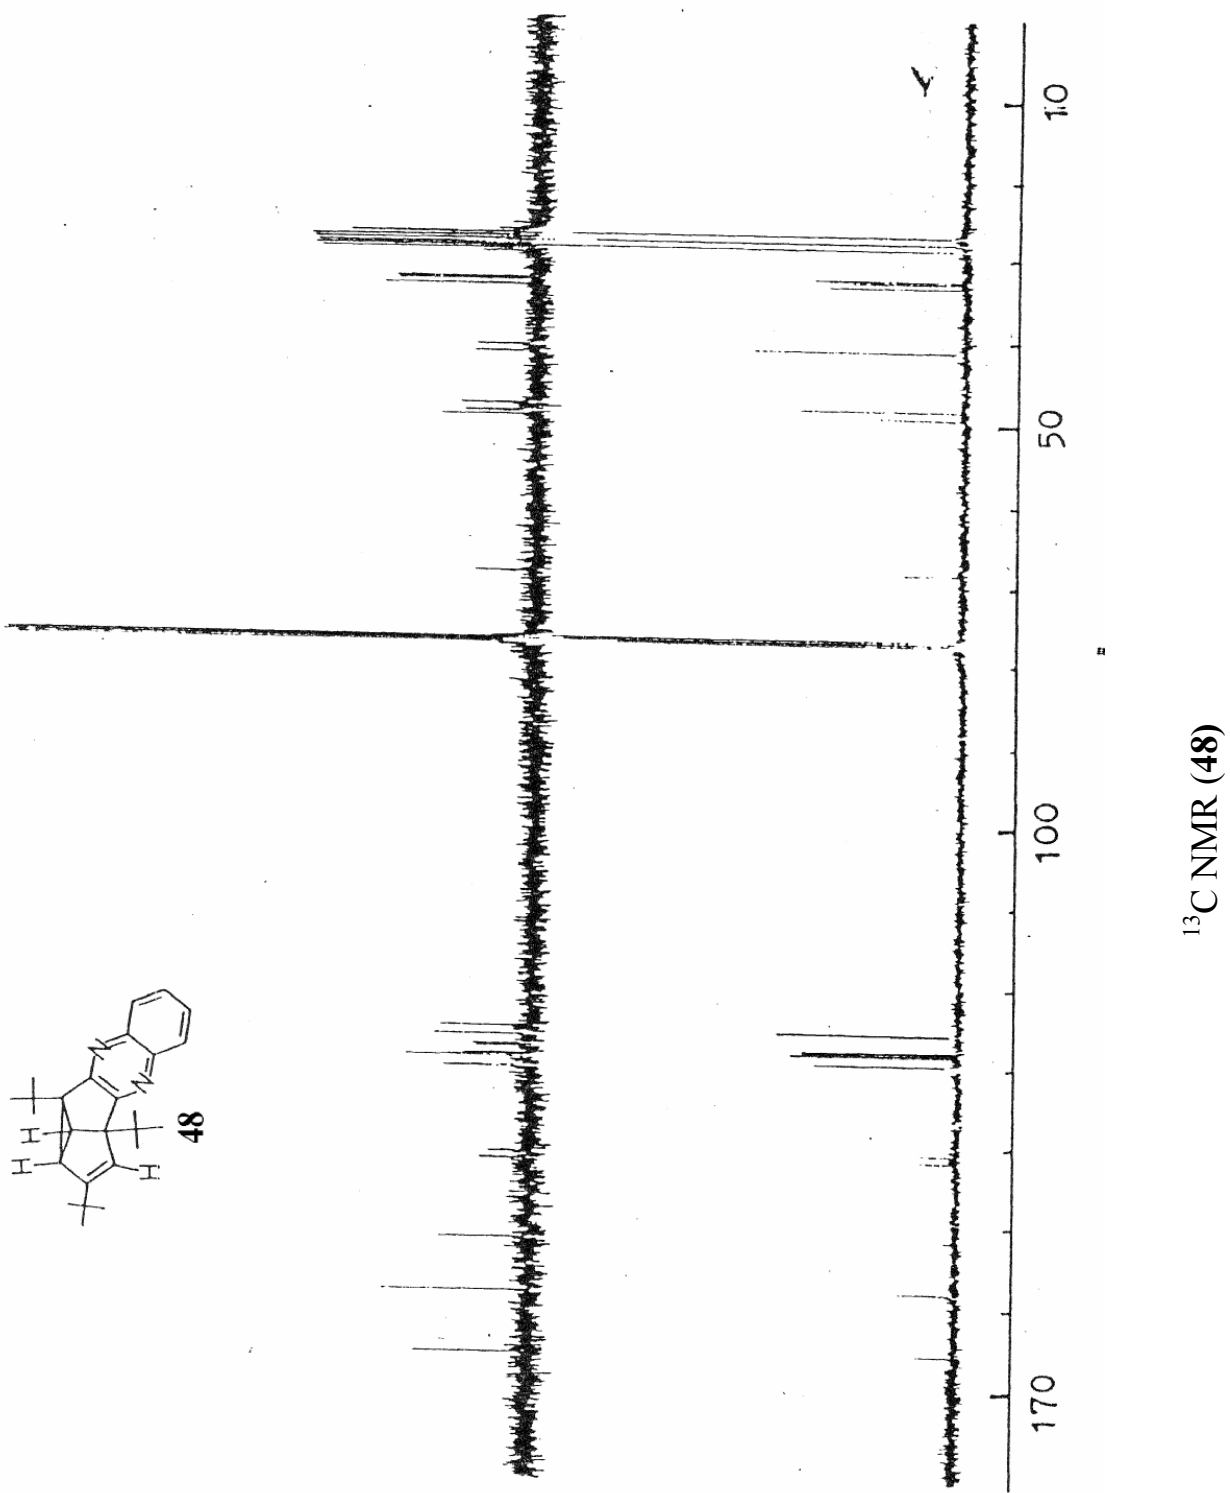

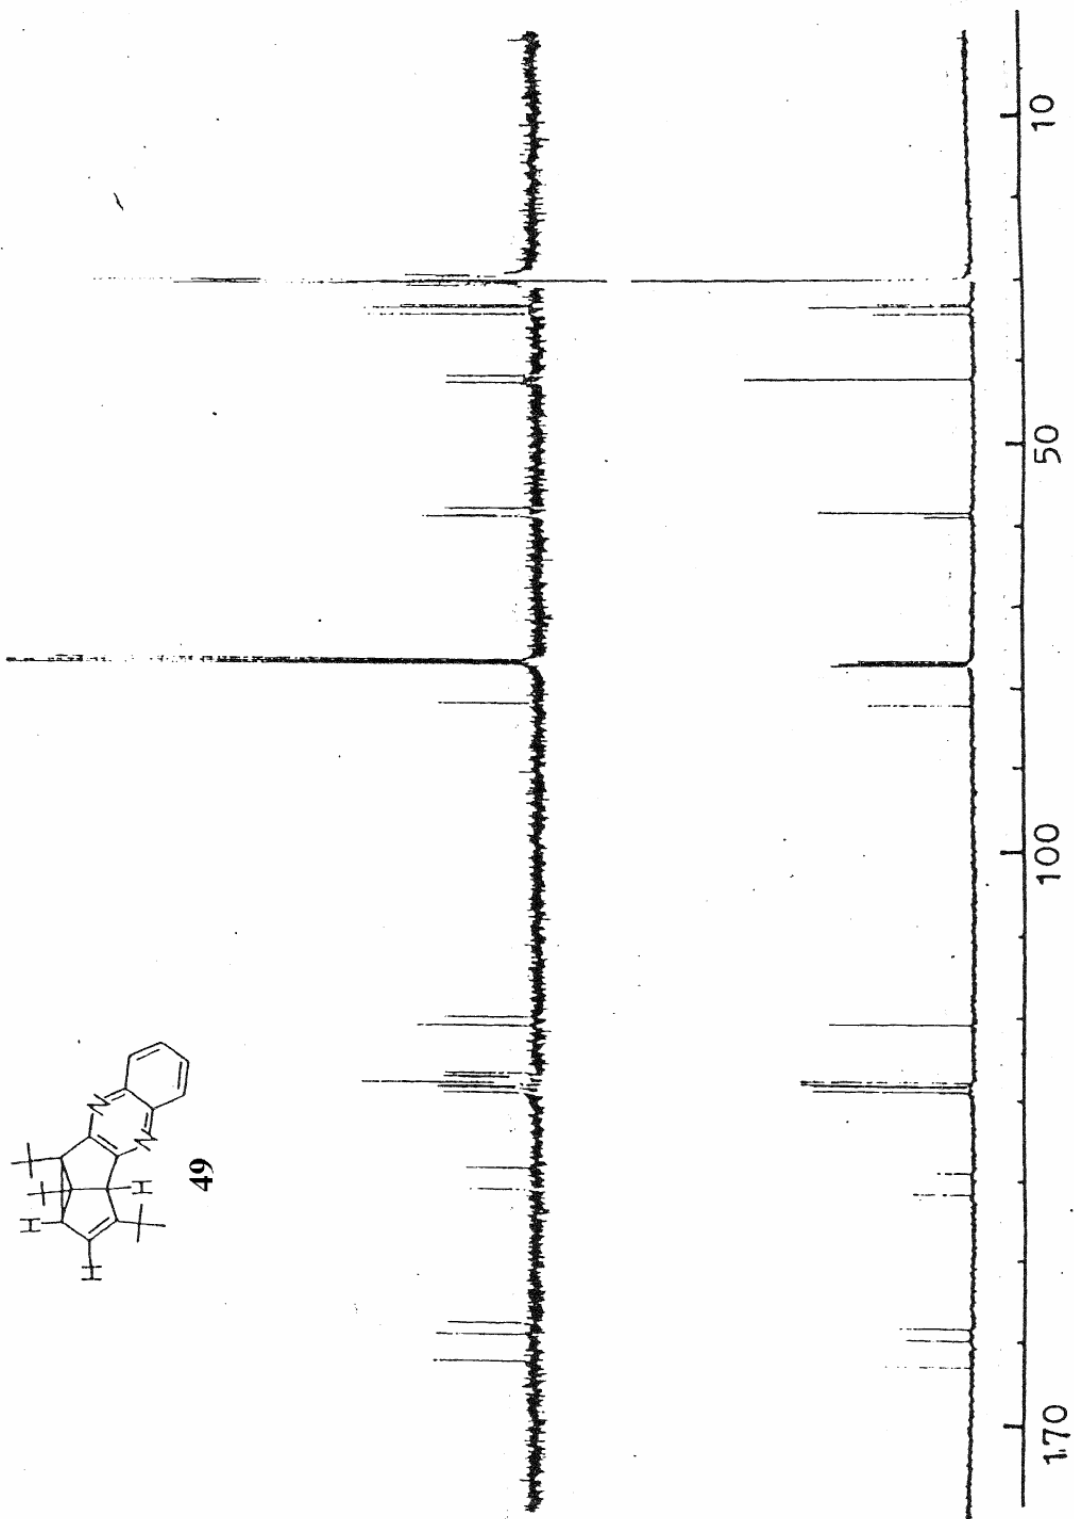

$^{13}\text{C}$  NMR (49)

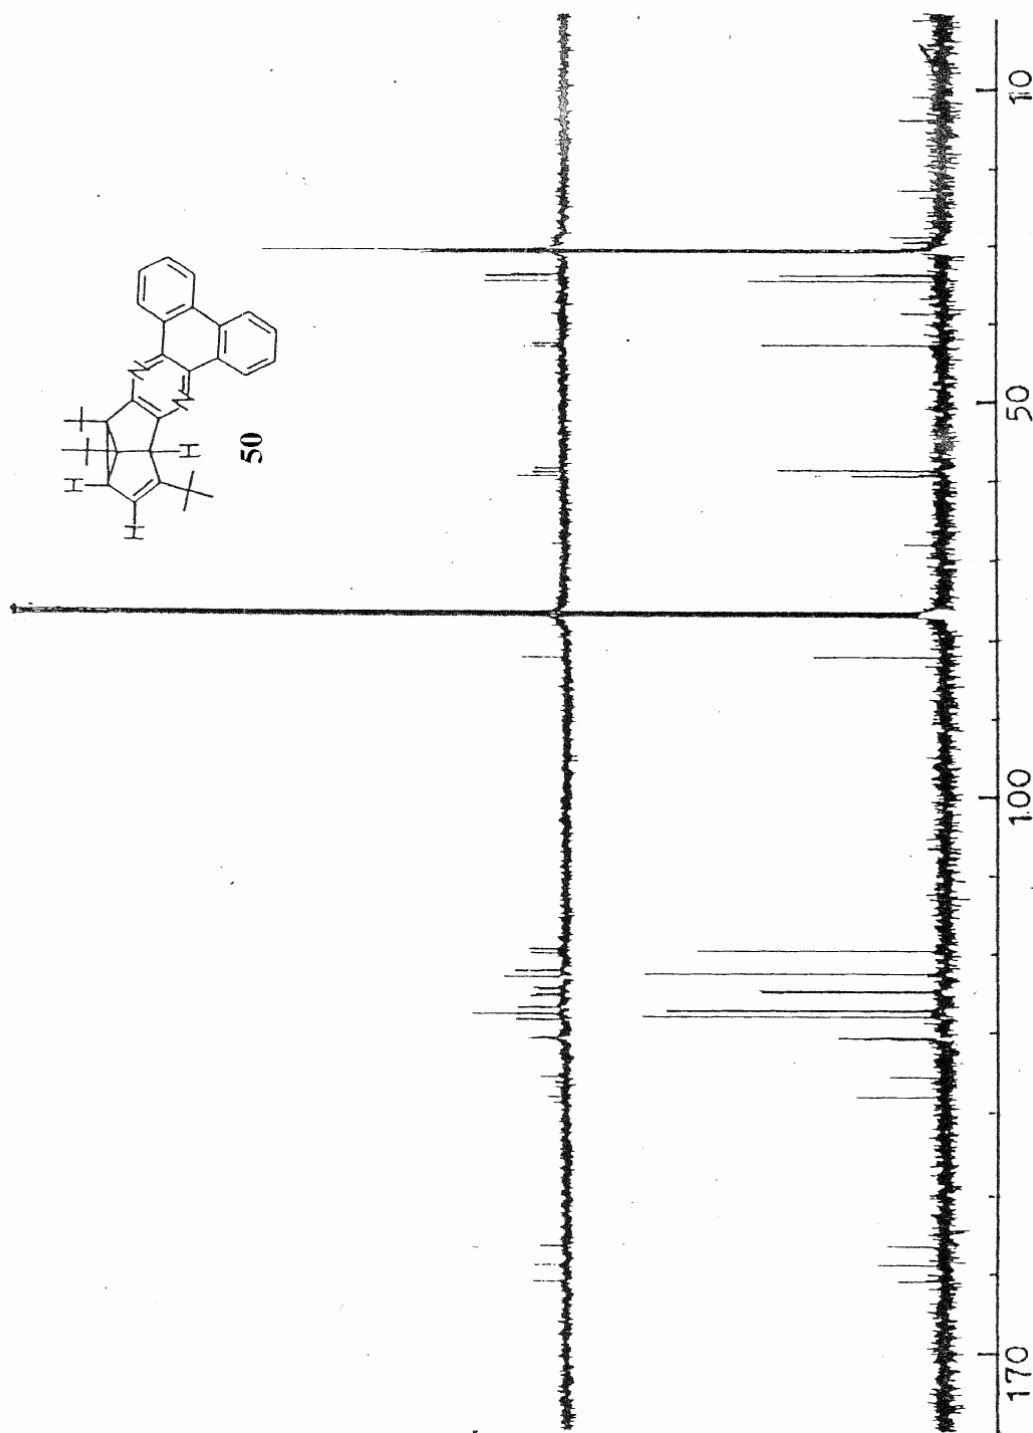

$^{13}\text{C}$  NMR (50)

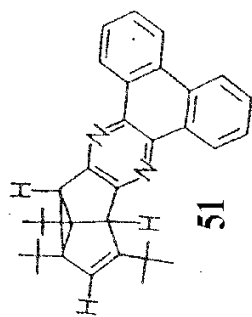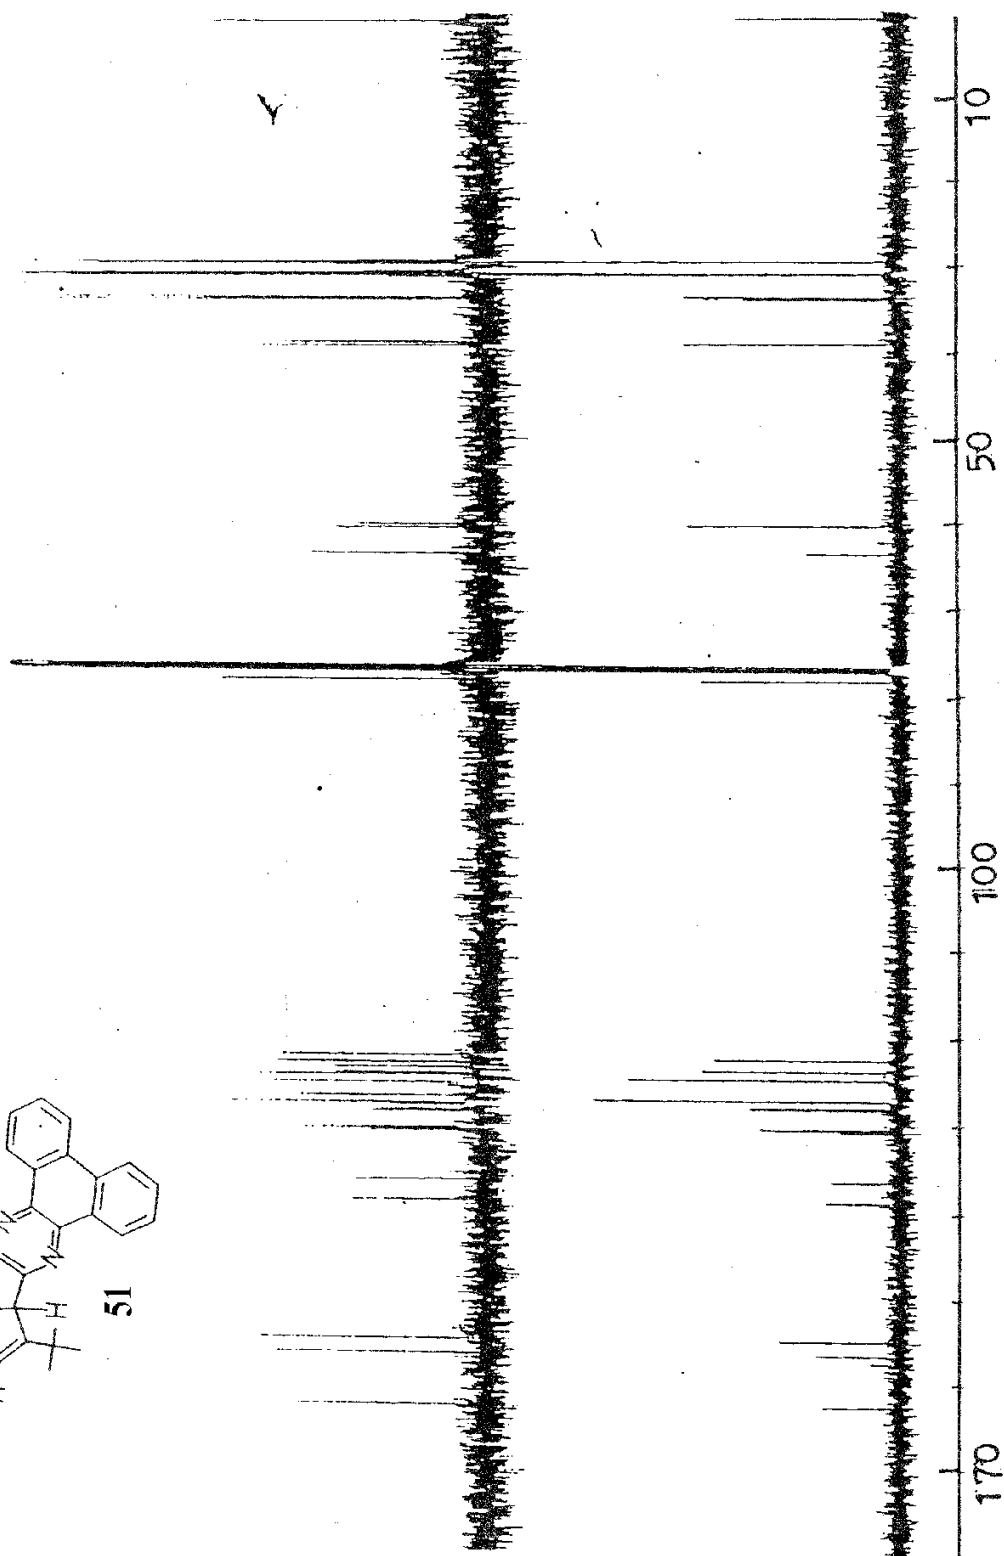

$^{13}\text{C}$  NMR (51)

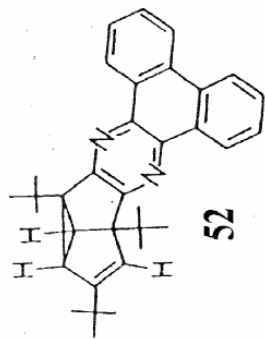

52

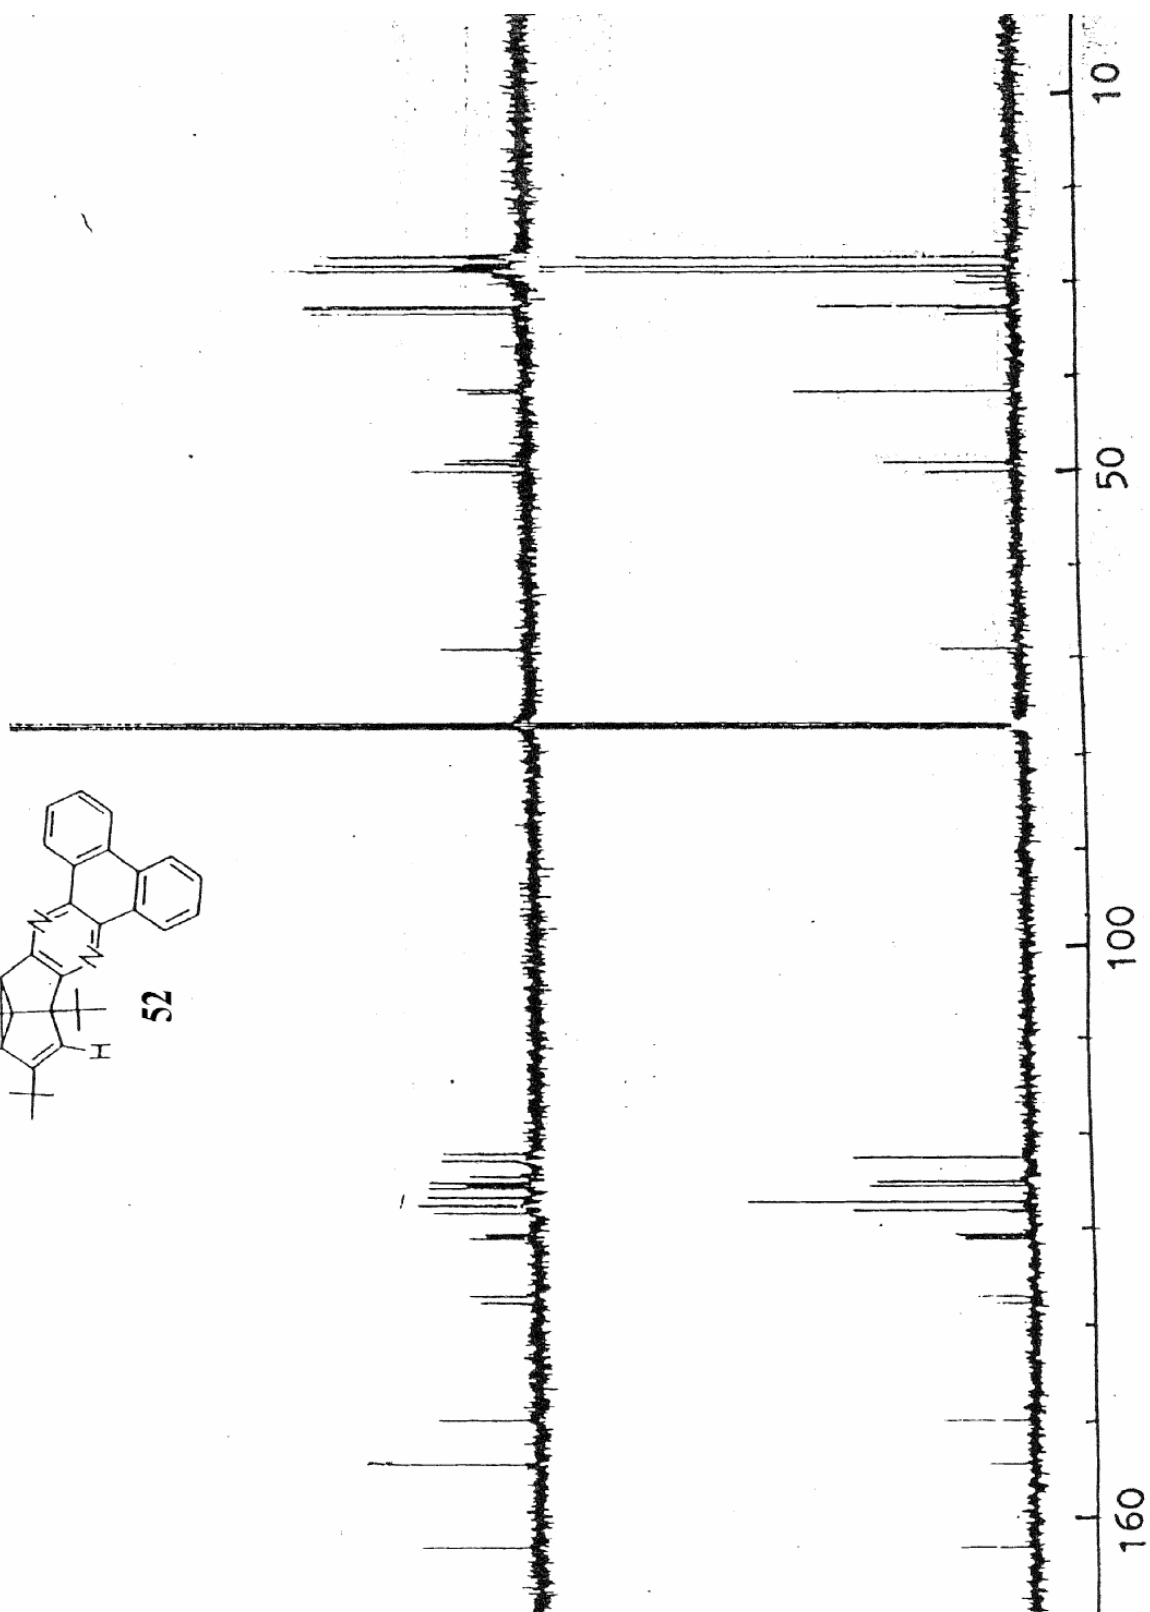

$^{13}\text{C}$  NMR (52)

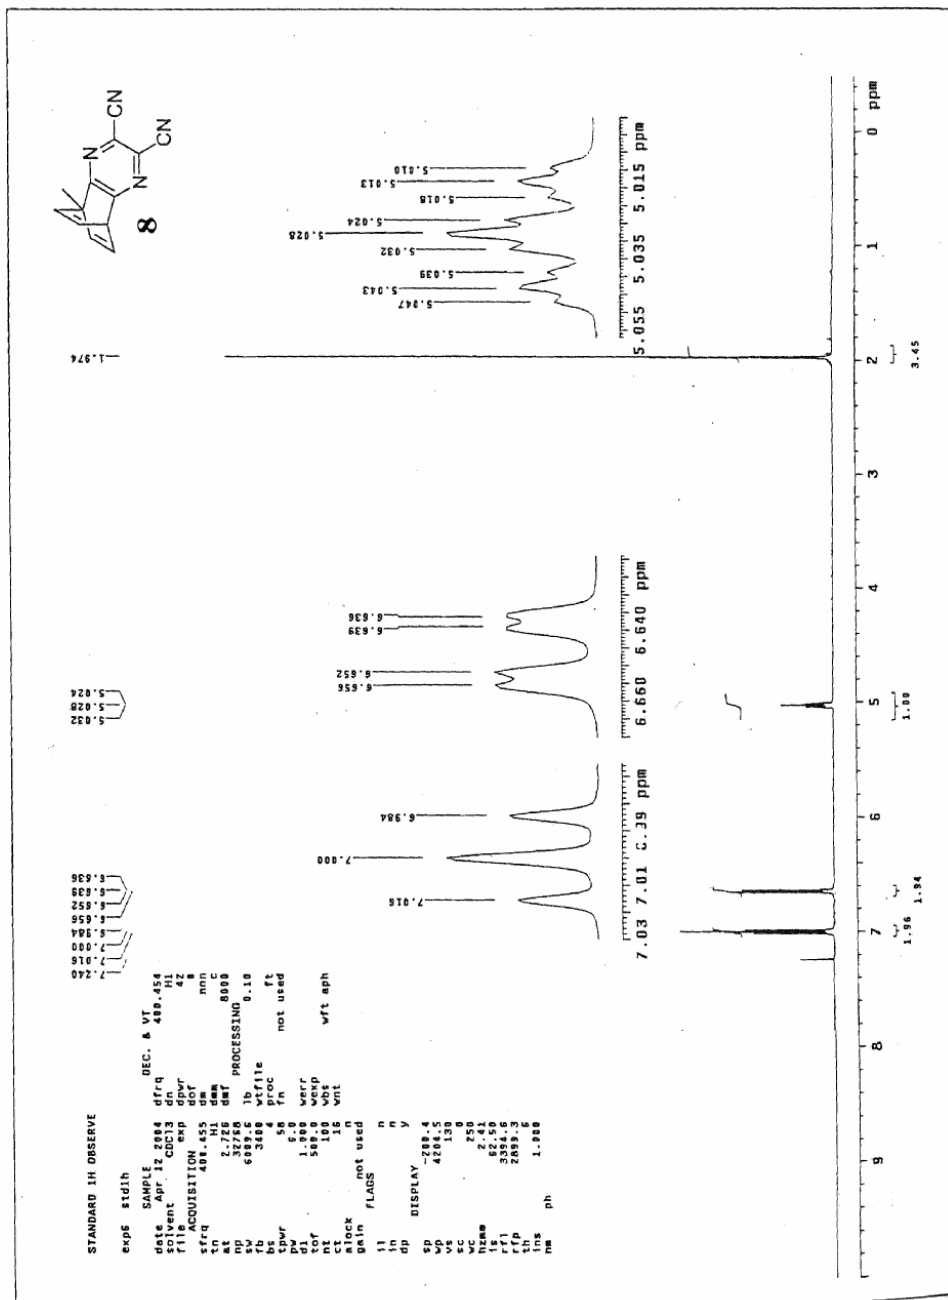

<sup>1</sup>H NMR (8)





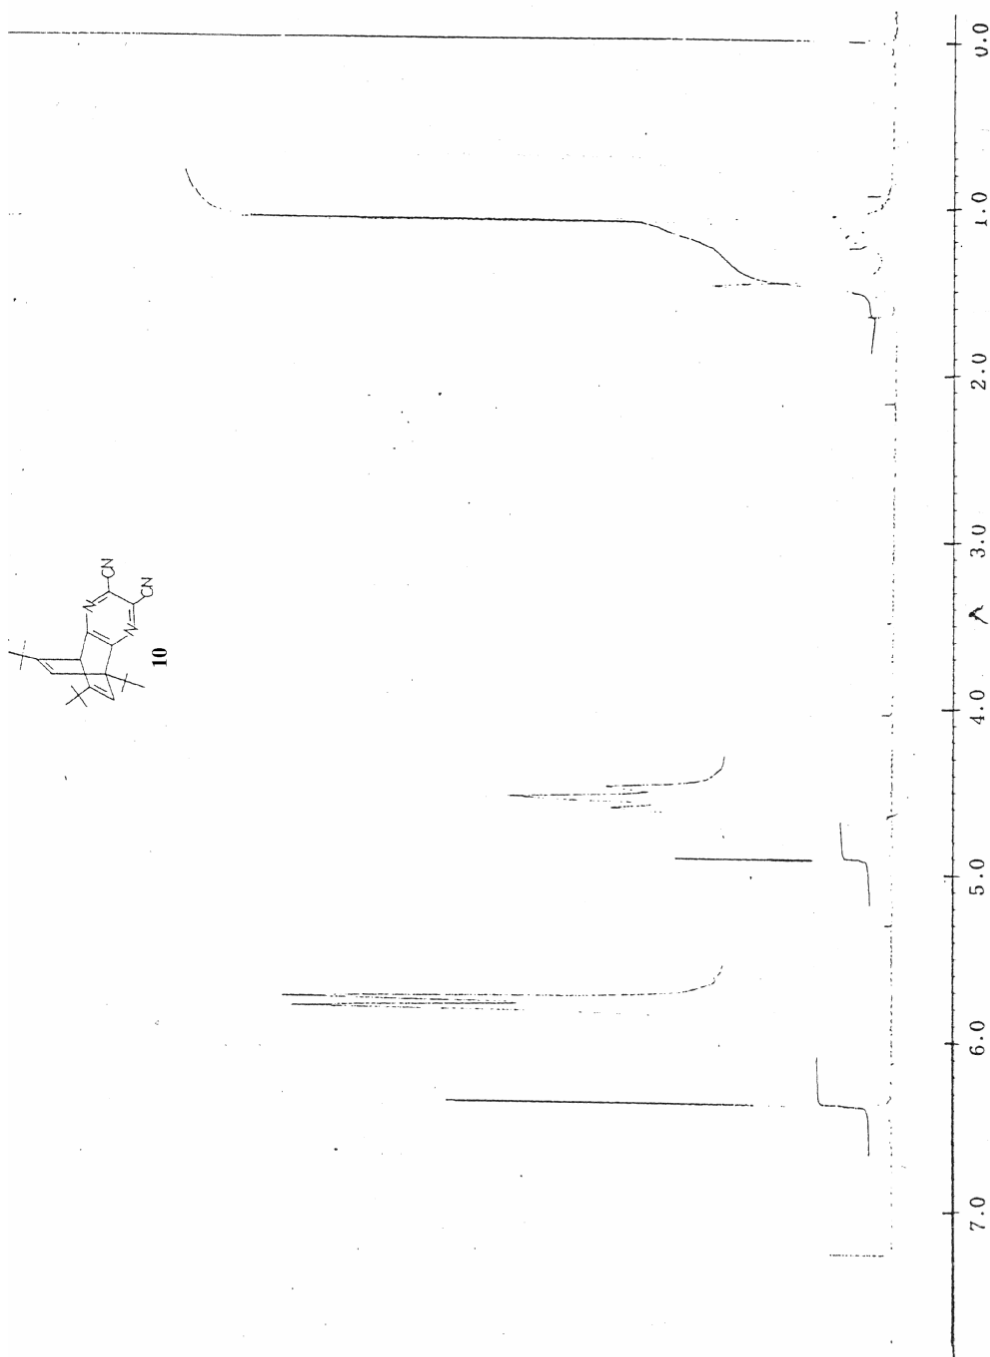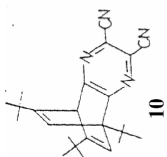

<sup>1</sup>H NMR (10)

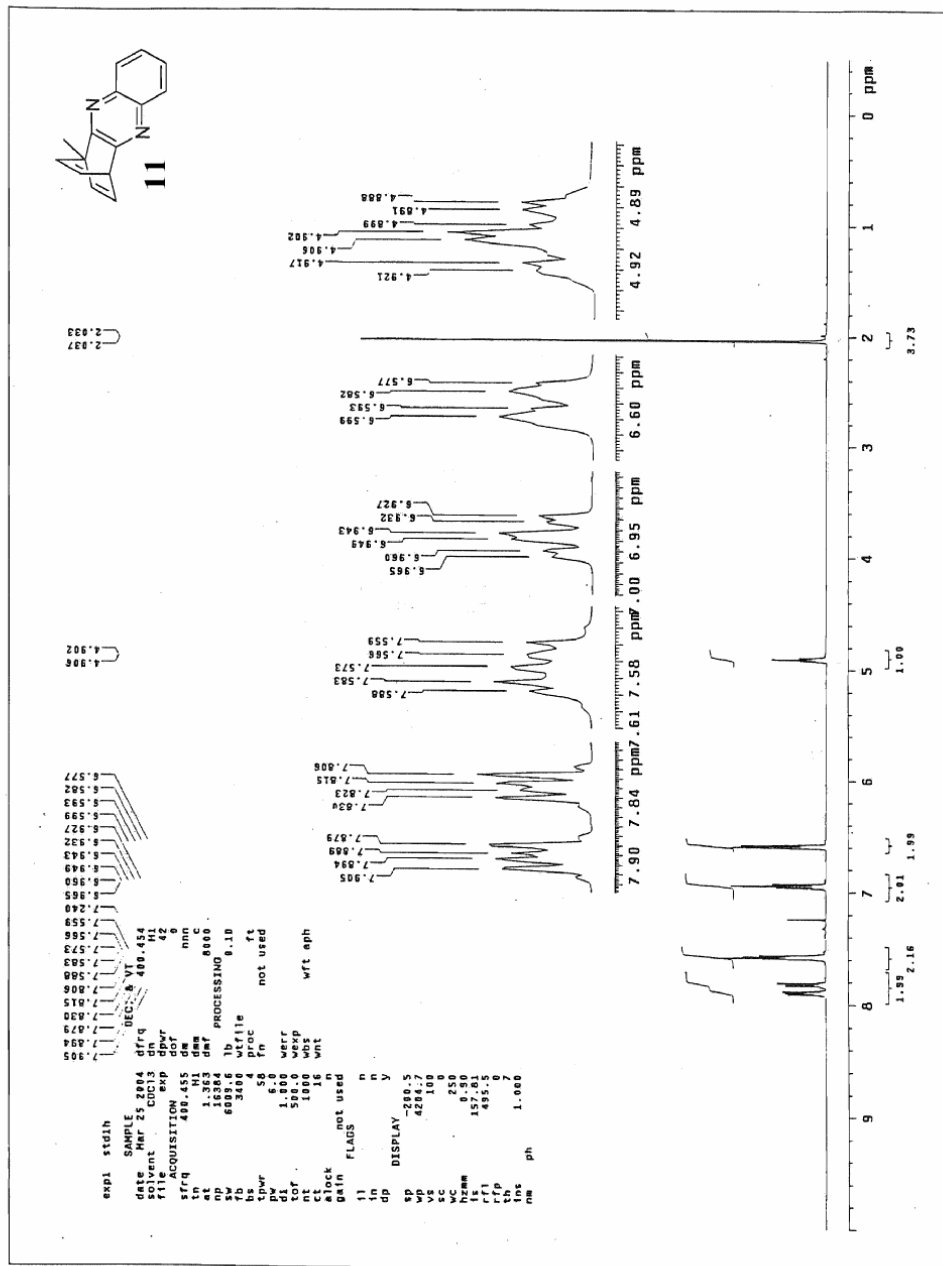

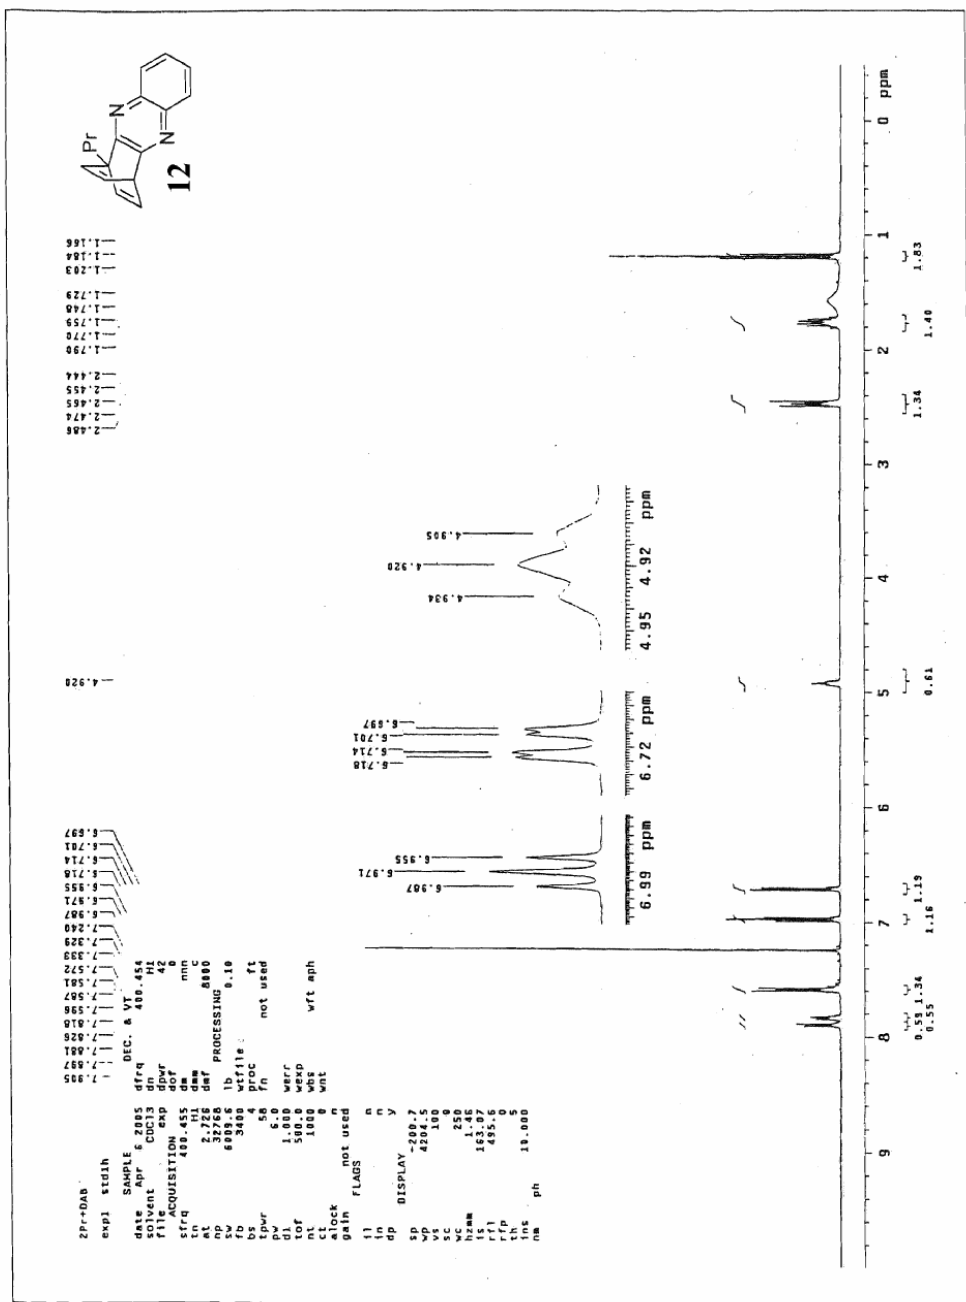

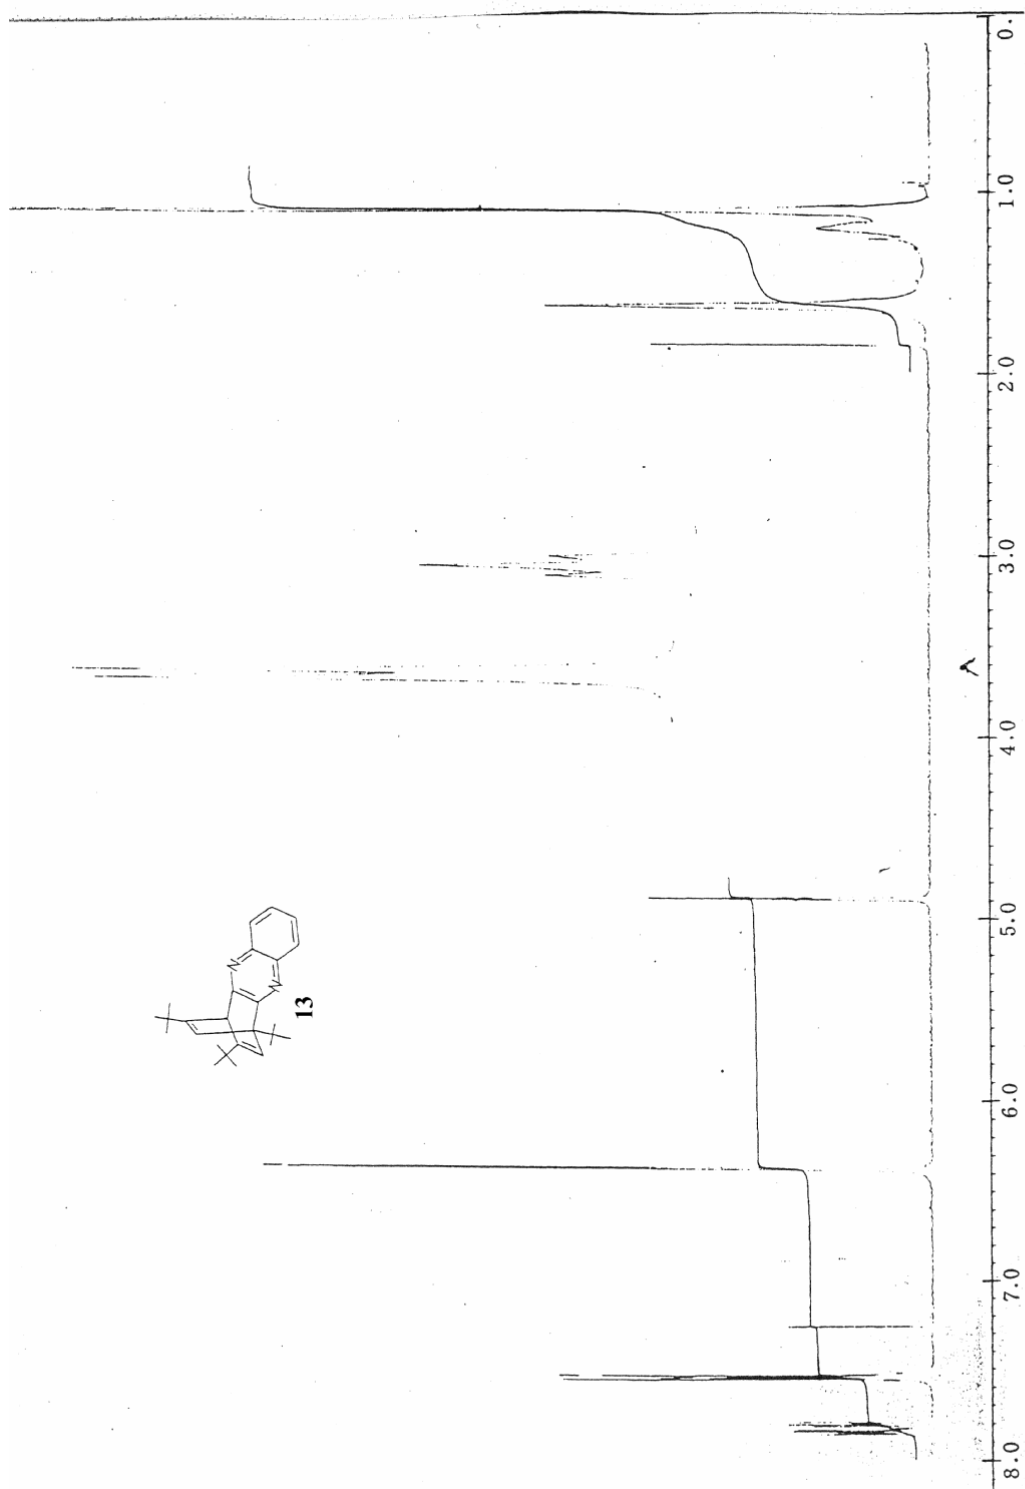

<sup>1</sup>H NMR (13)

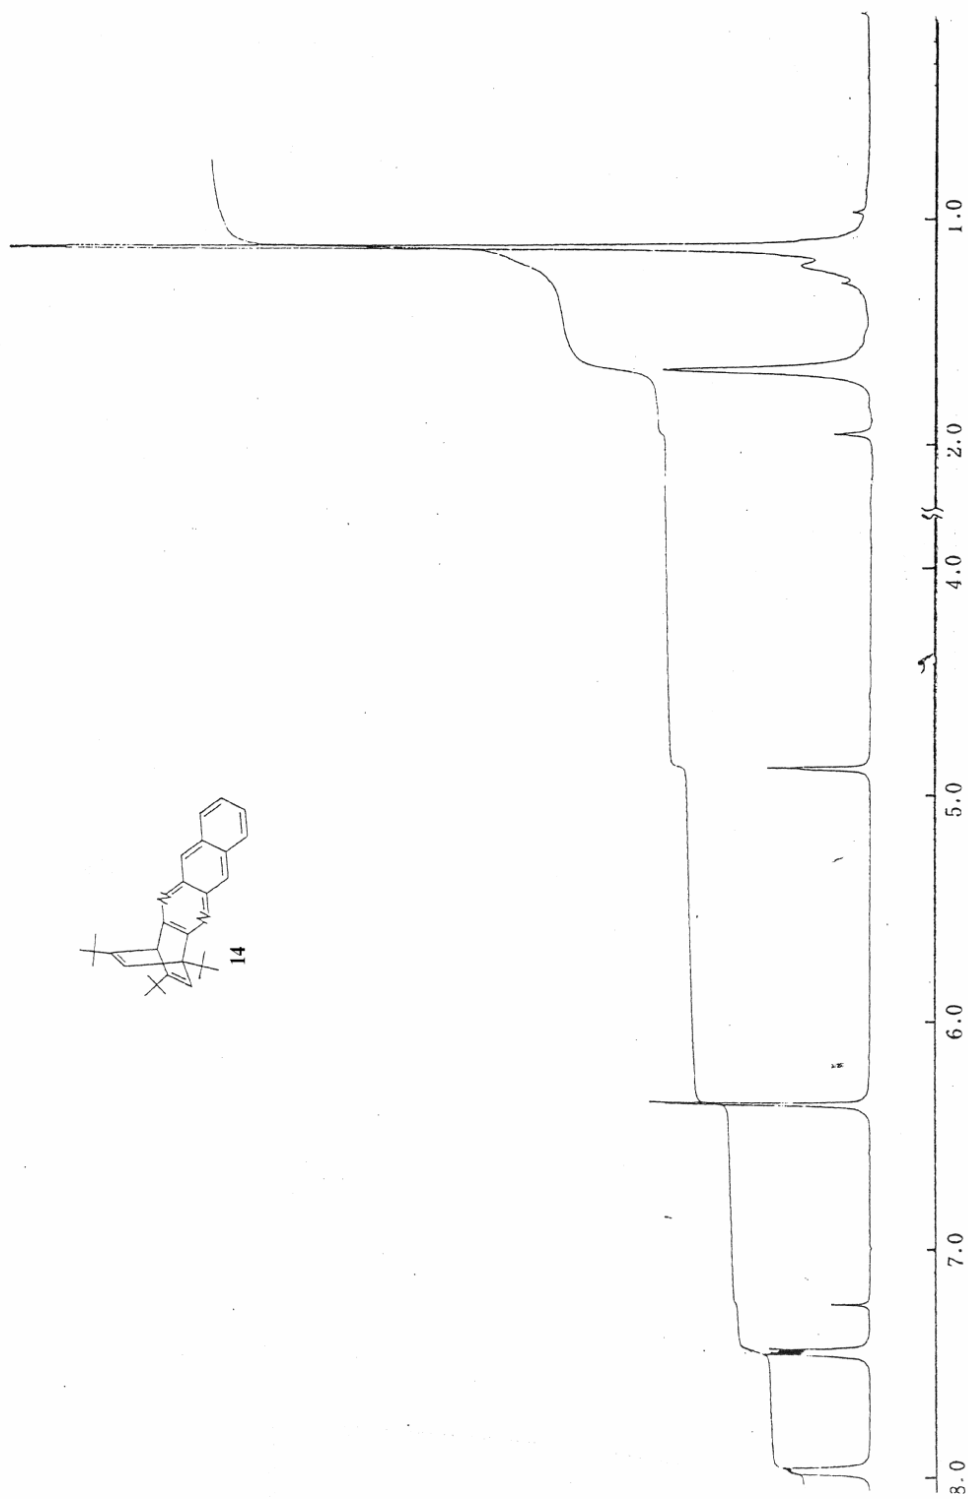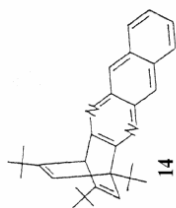

<sup>1</sup>H NMR (14)

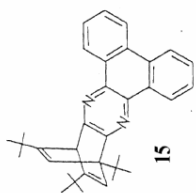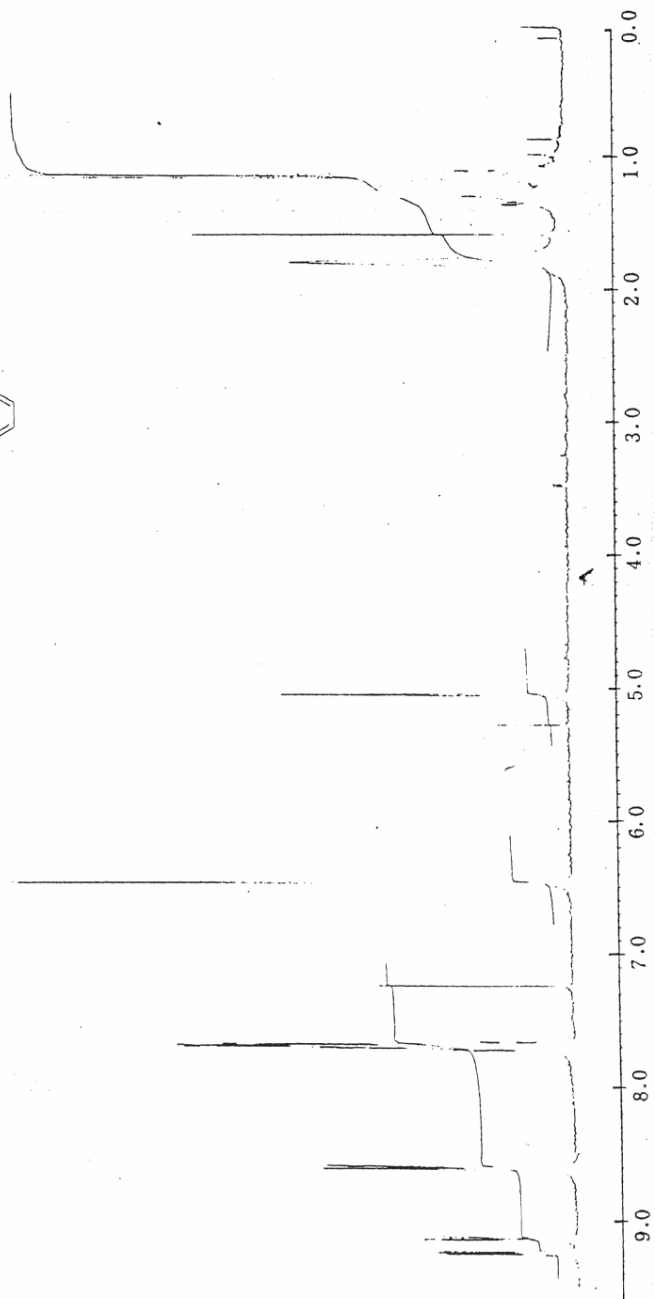

<sup>1</sup>H NMR (15)

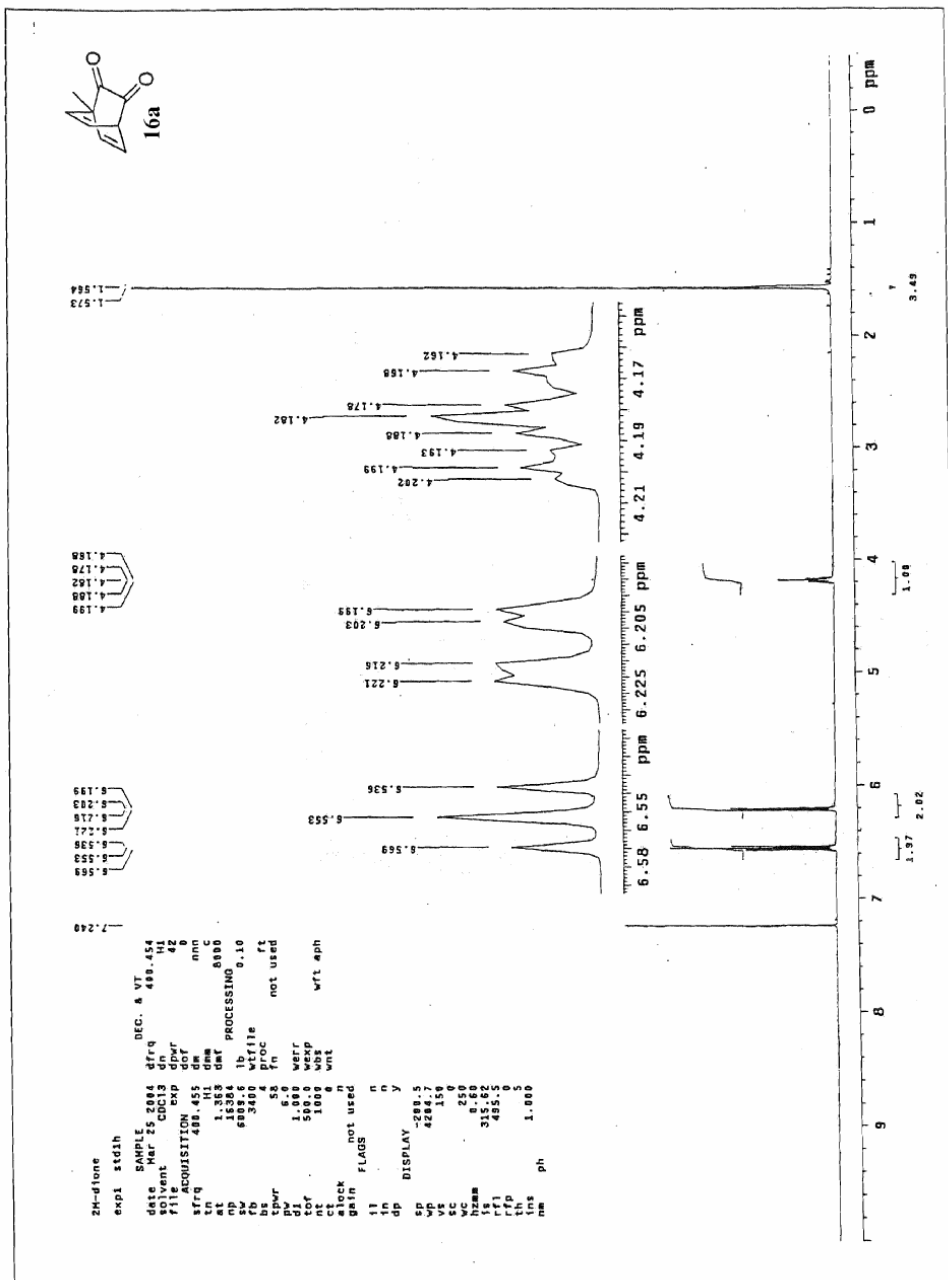

<sup>1</sup>H NMR (16a)





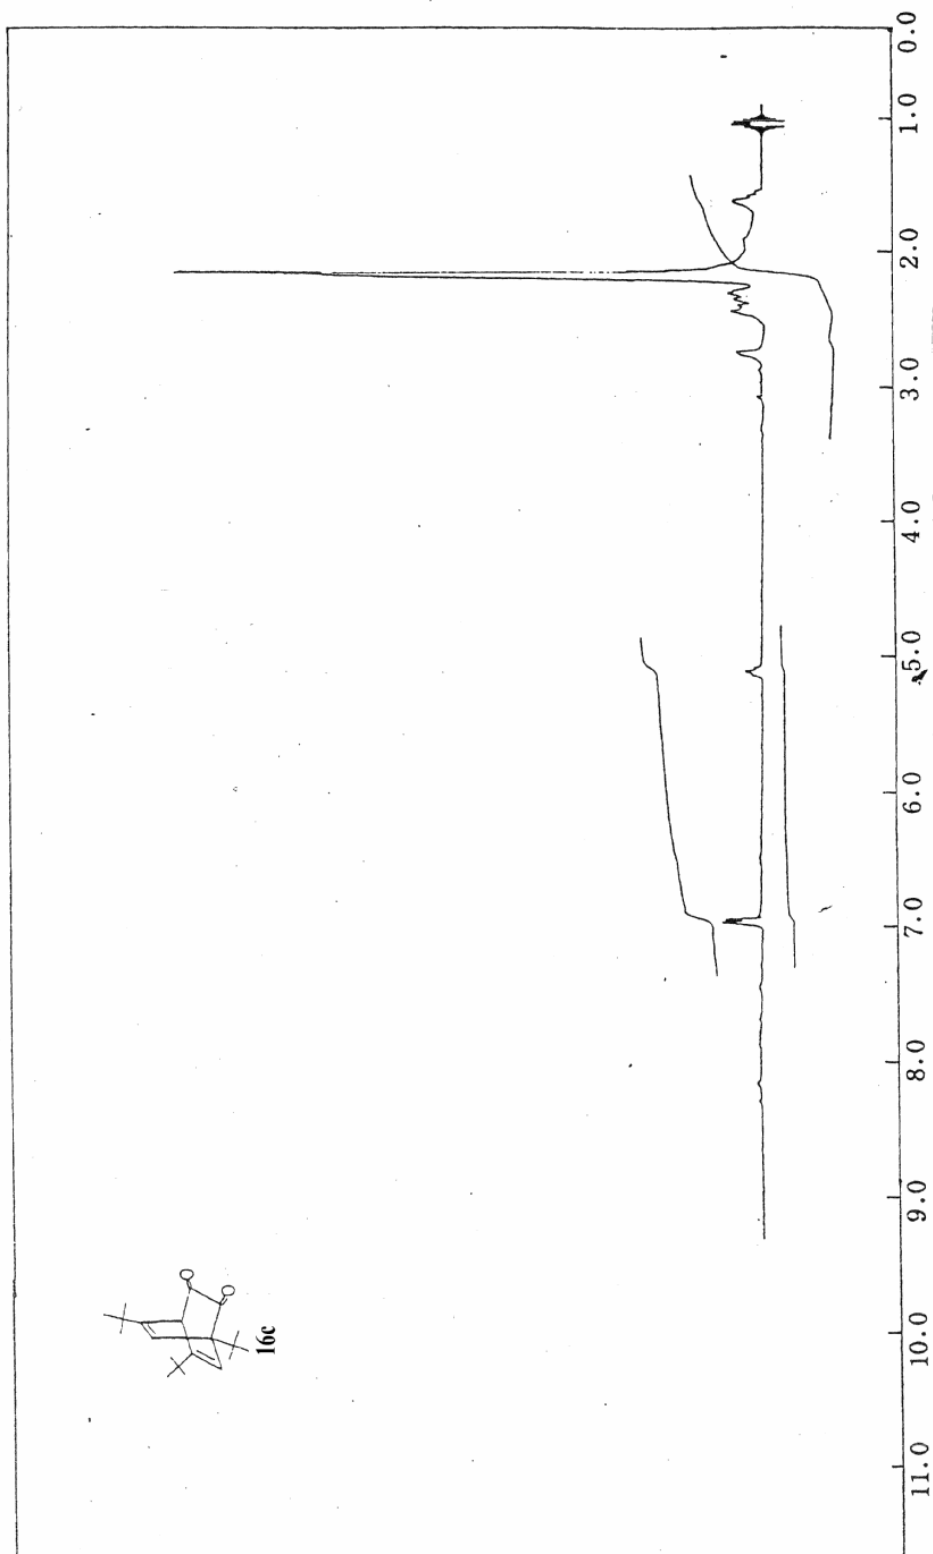

$^1\text{H}$  NMR (**16c**)

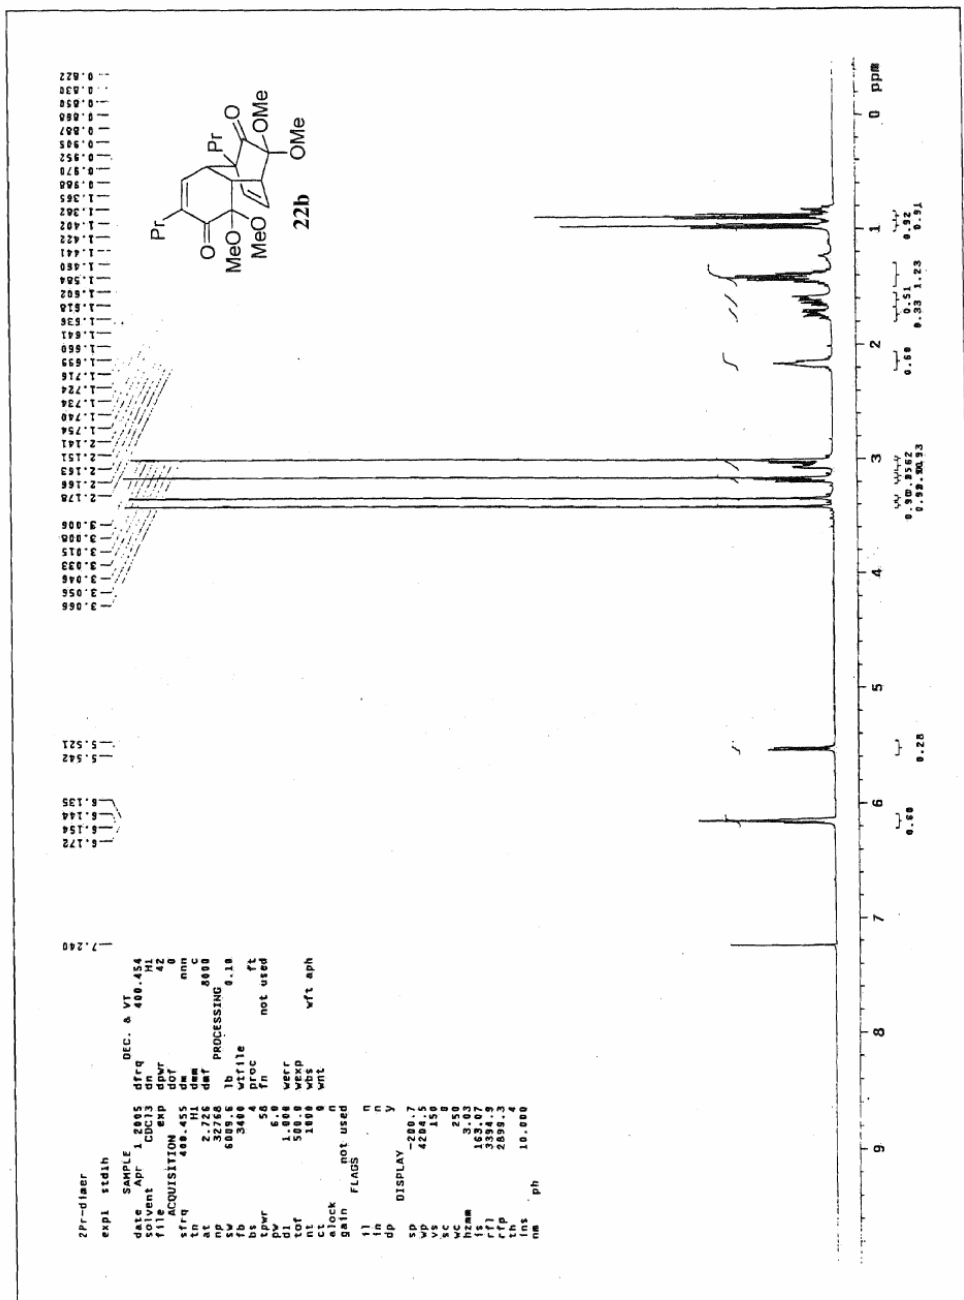

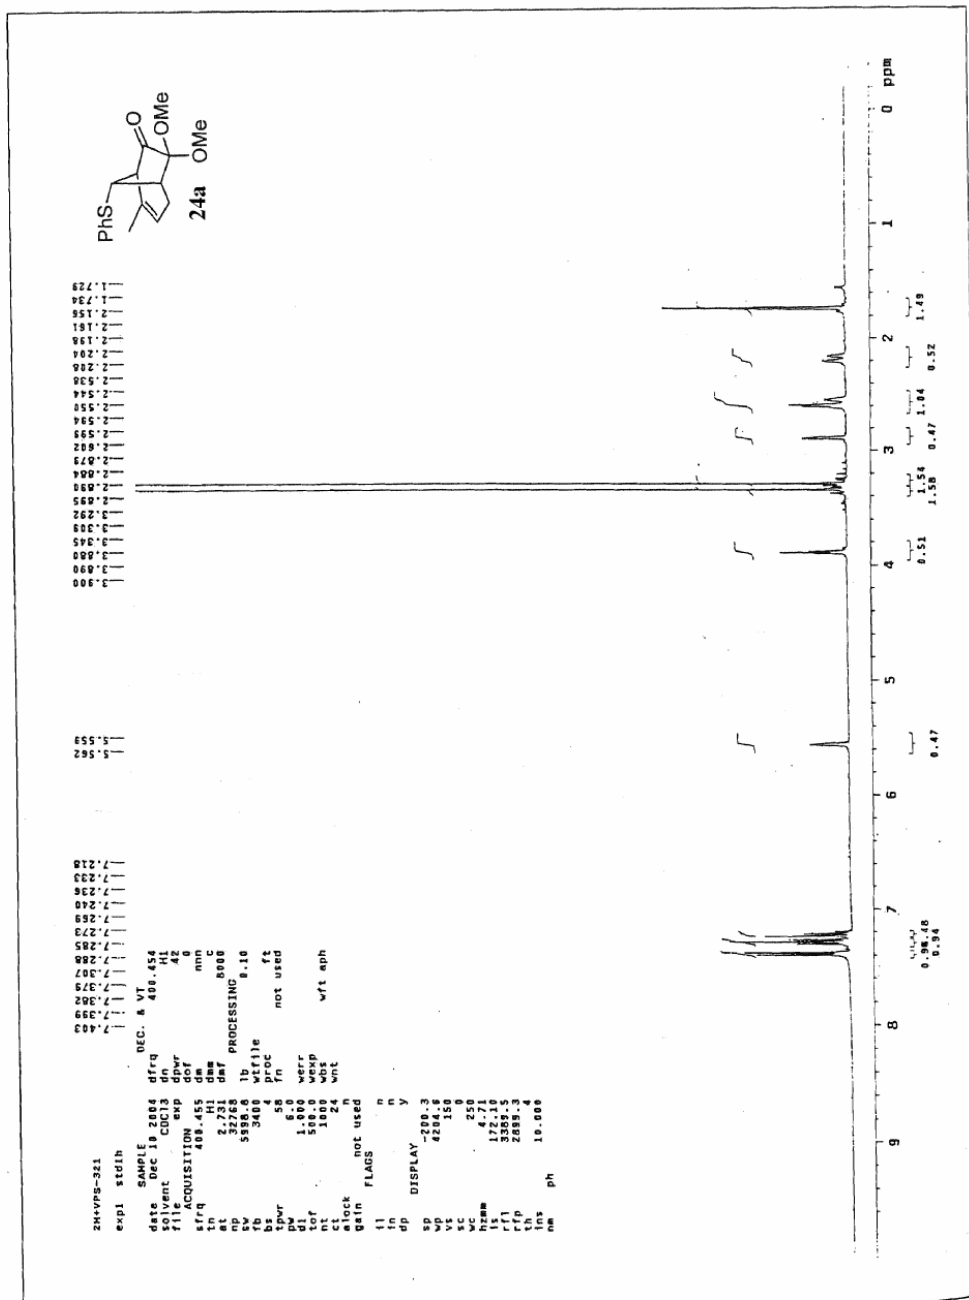

<sup>1</sup>H NMR (24a)

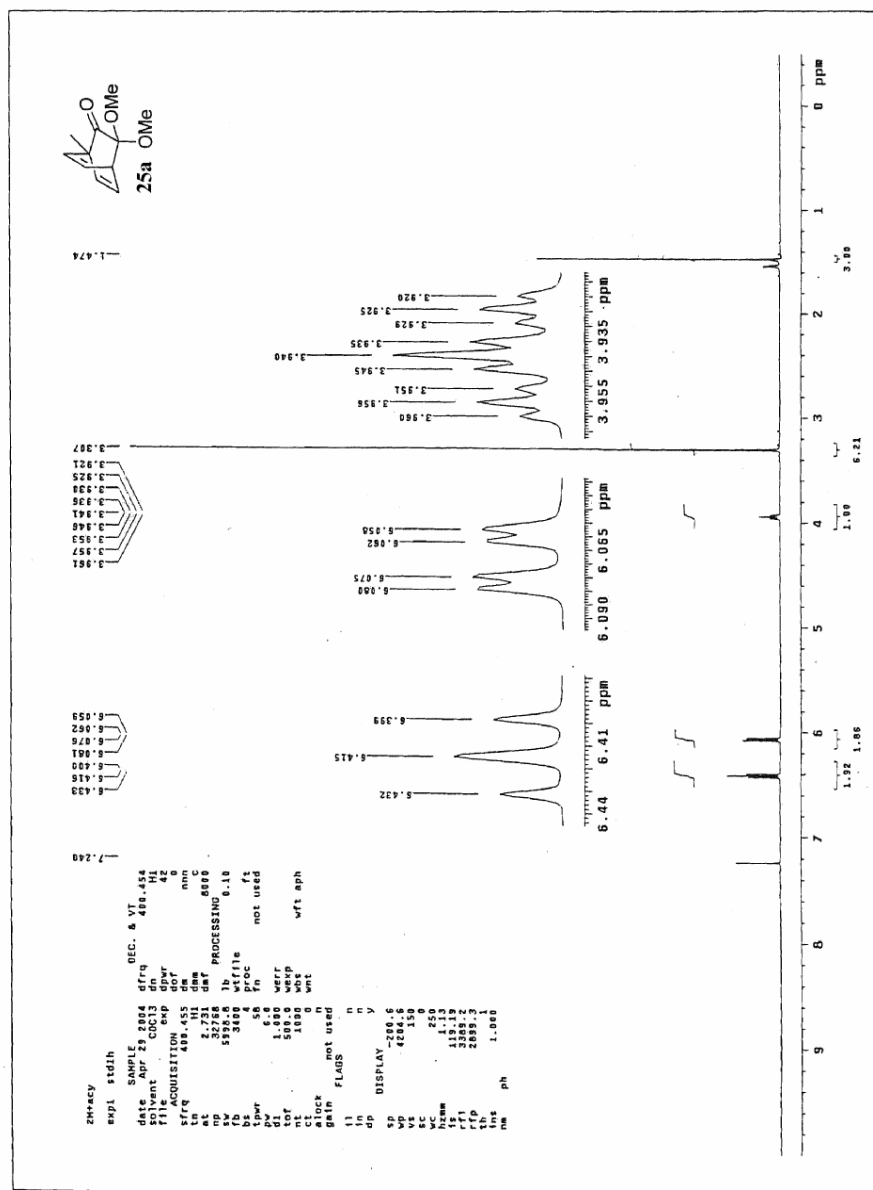

<sup>1</sup>H NMR (25a)

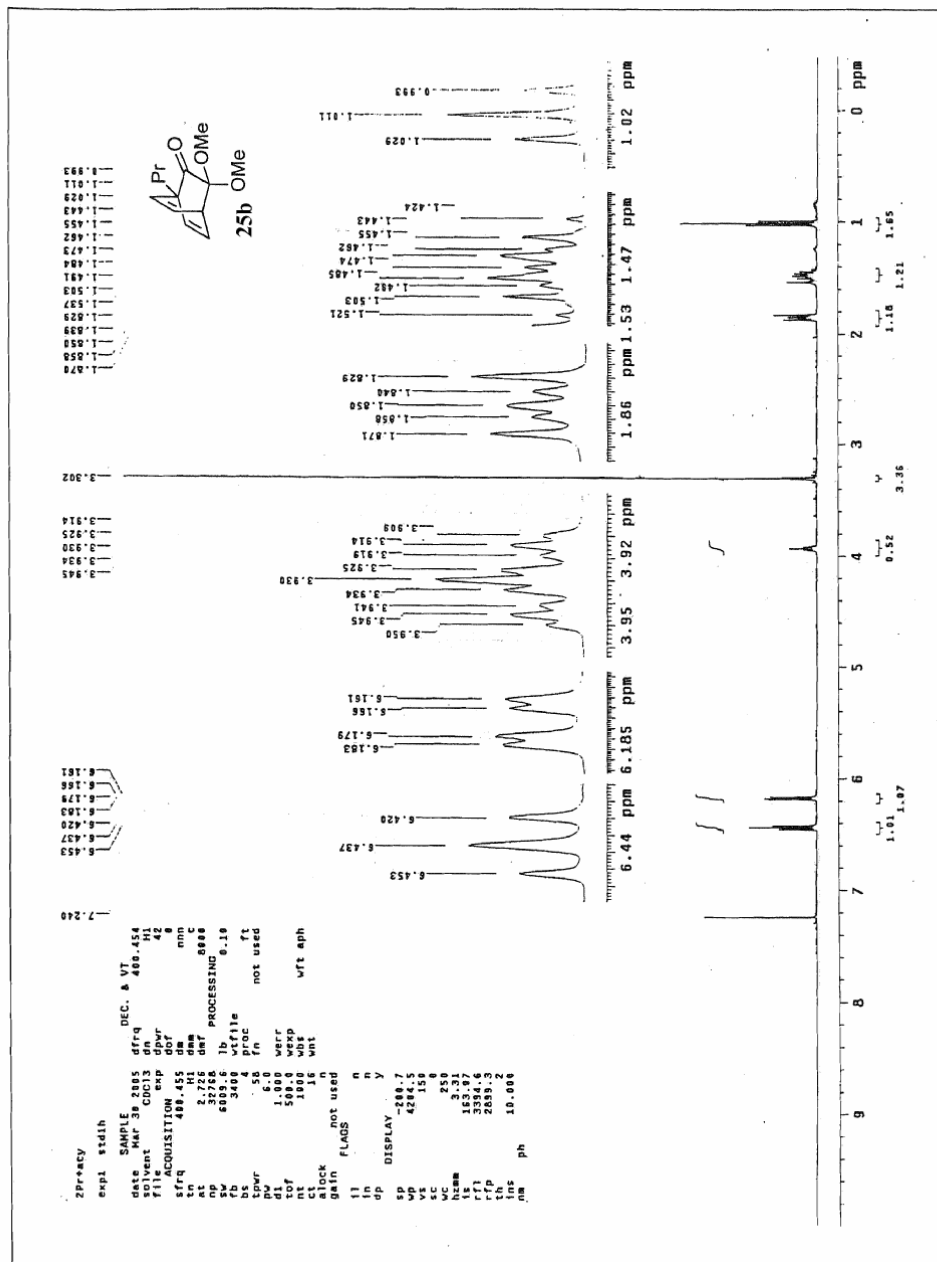

<sup>1</sup>H NMR (25b)

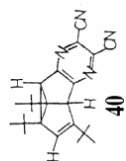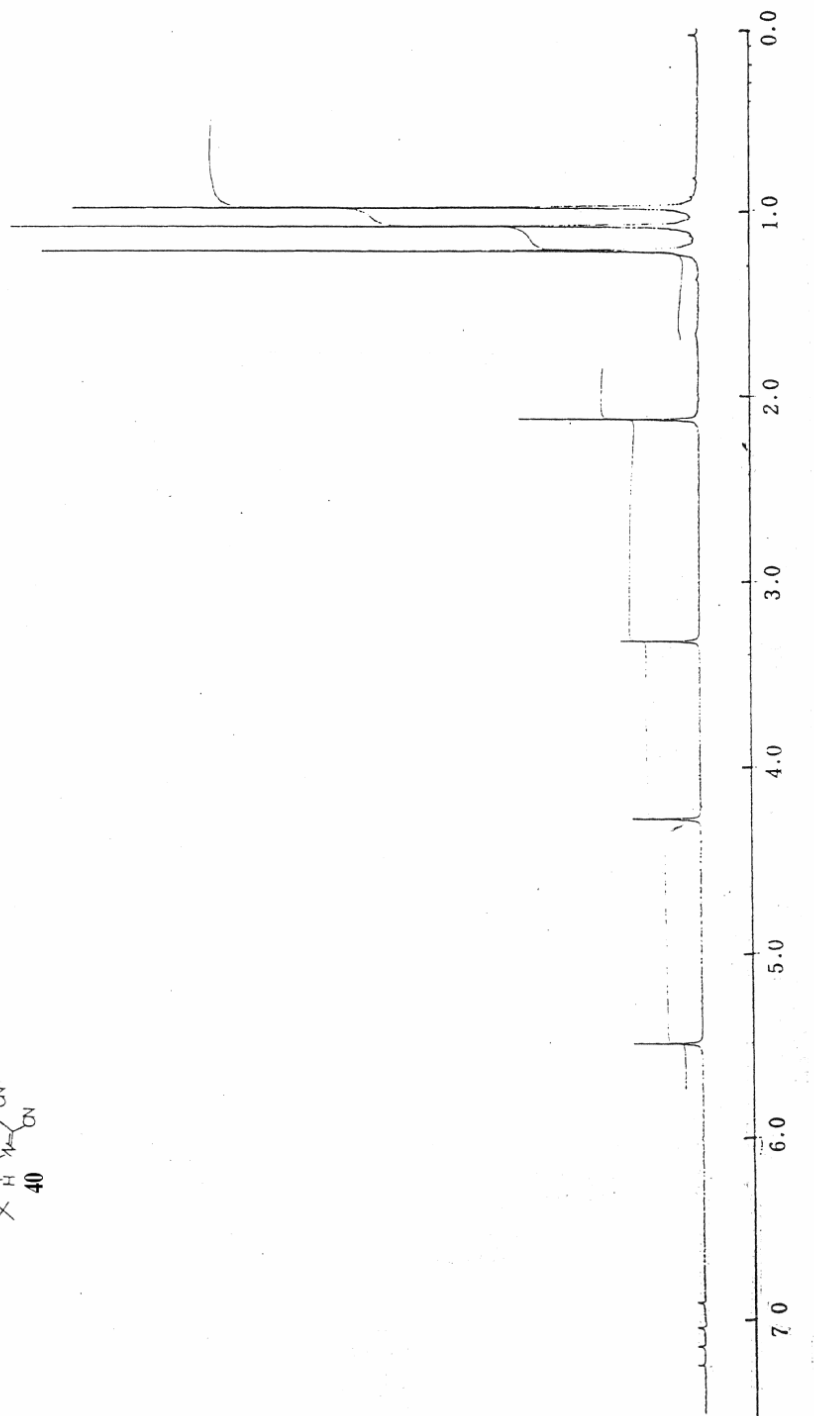

<sup>1</sup>H NMR (40)

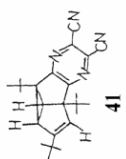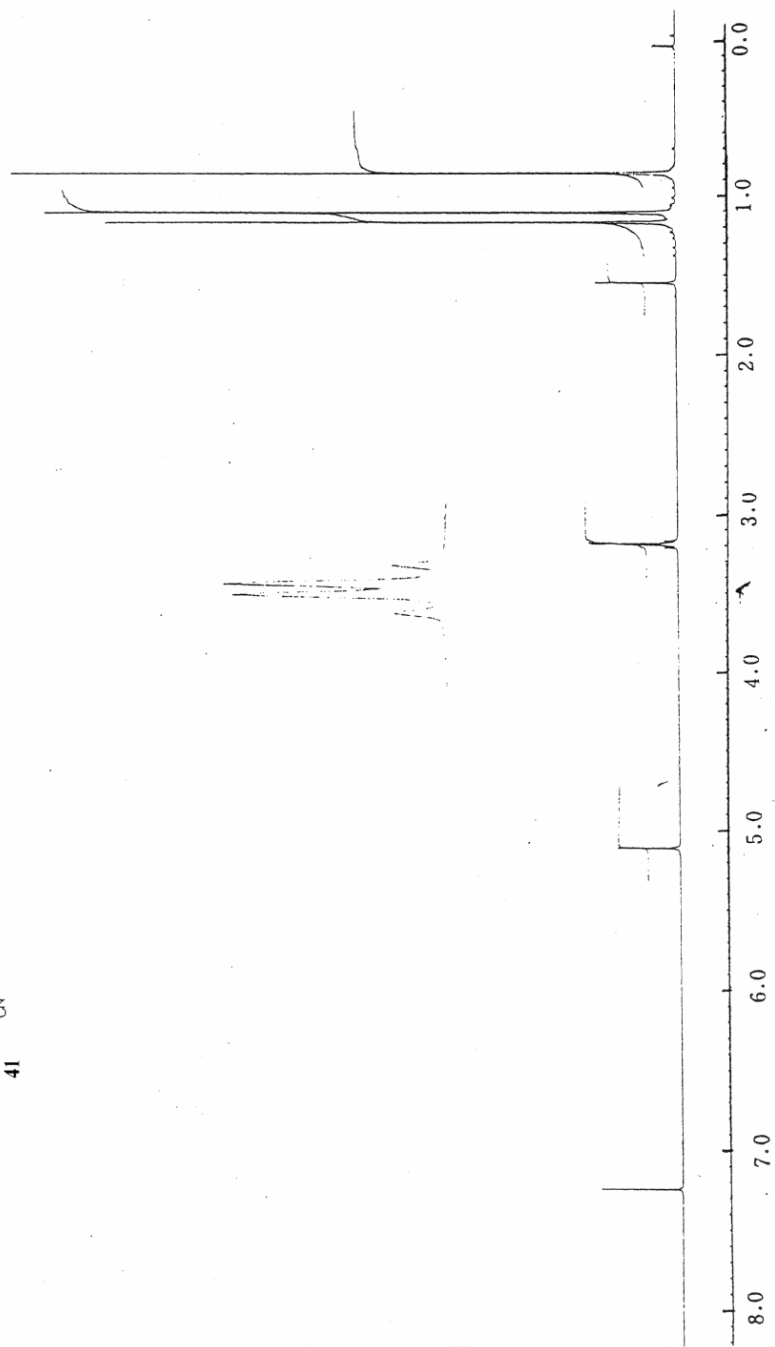

$^1\text{H NMR}$  (41)

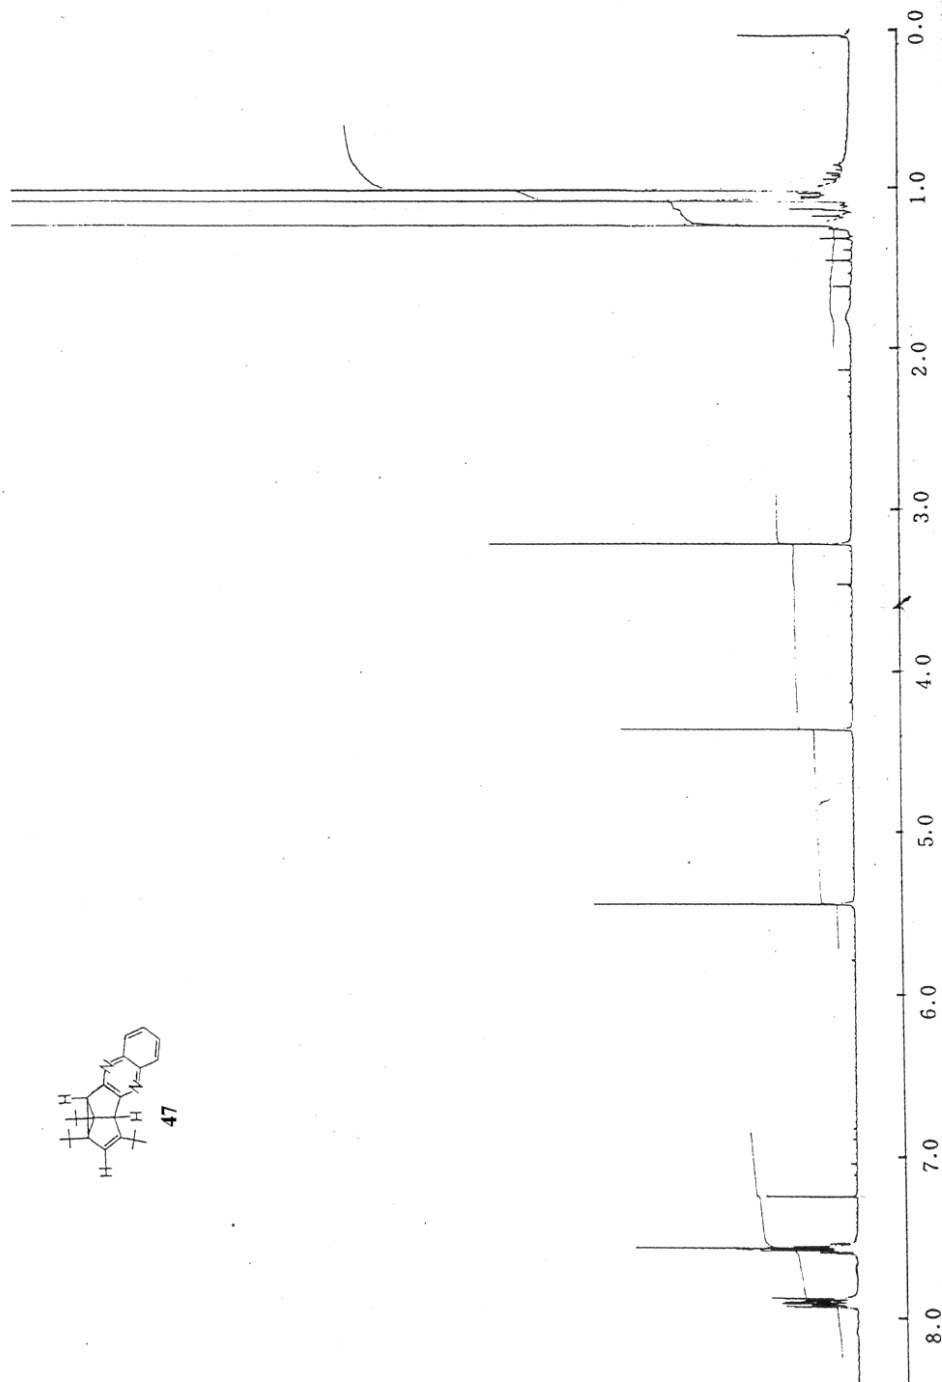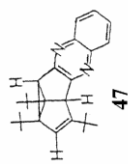

<sup>1</sup>H NMR (47)



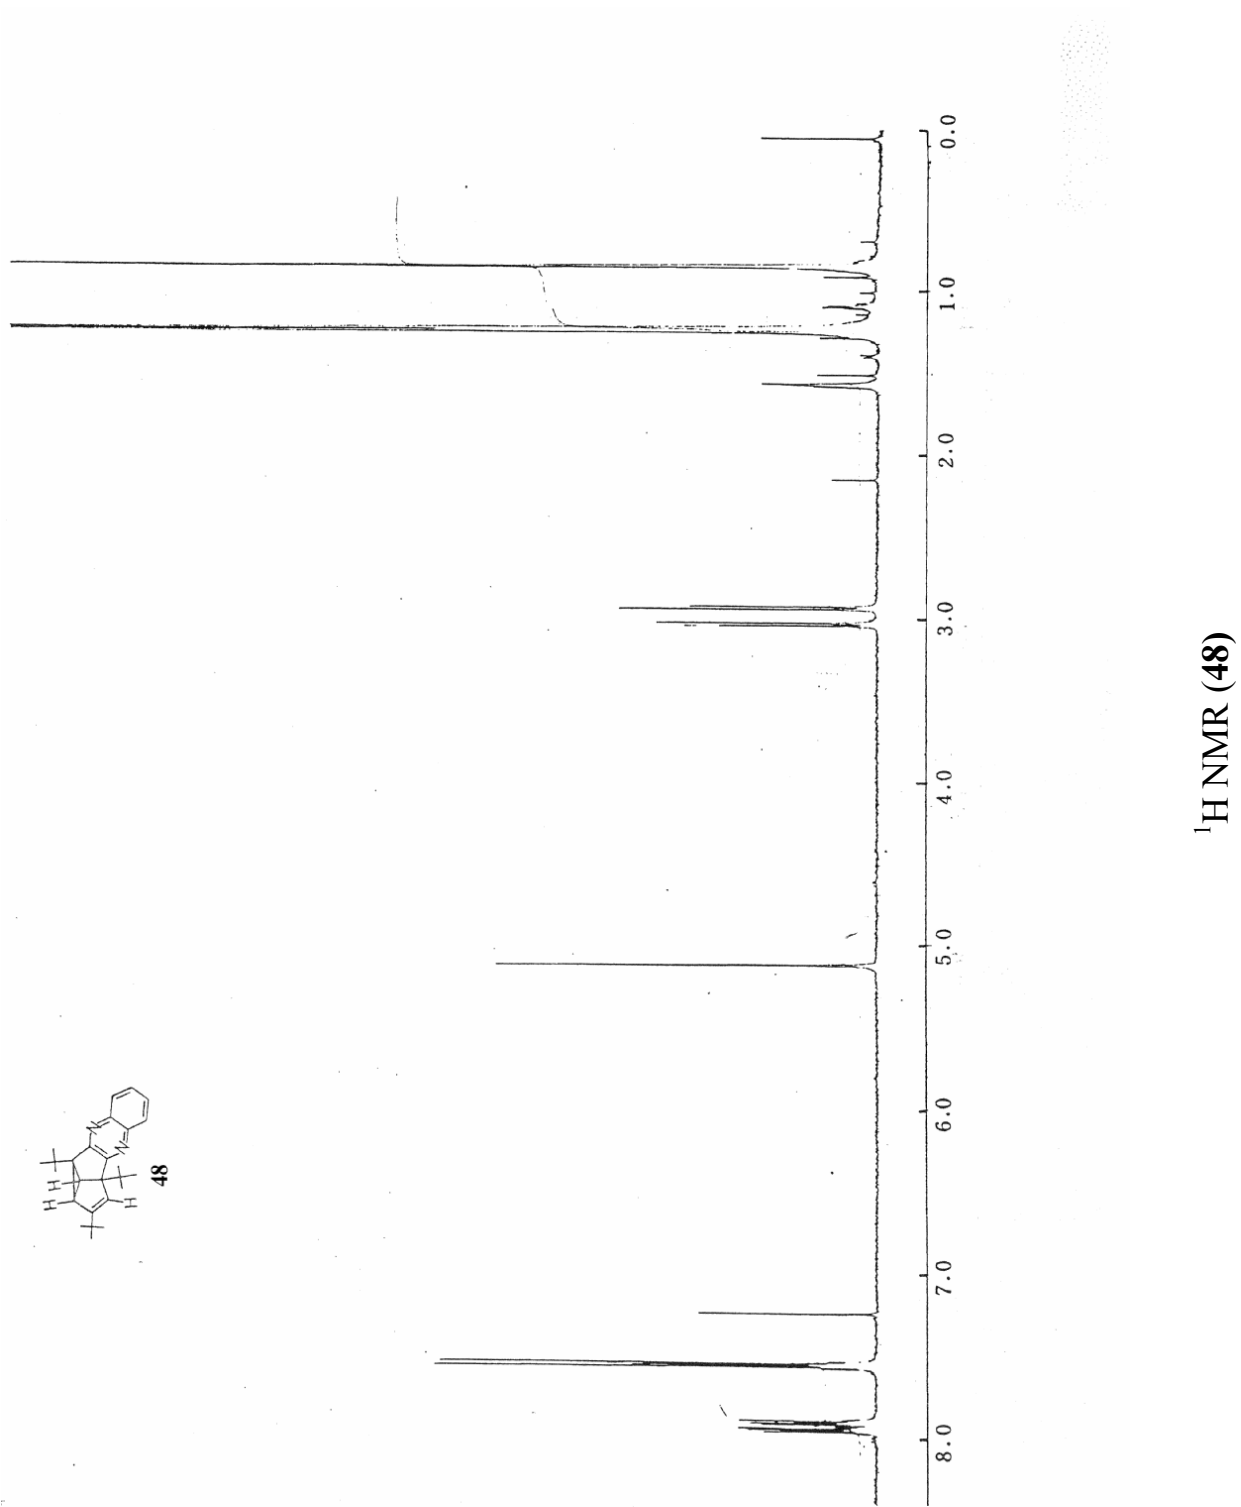

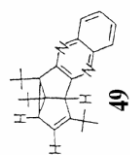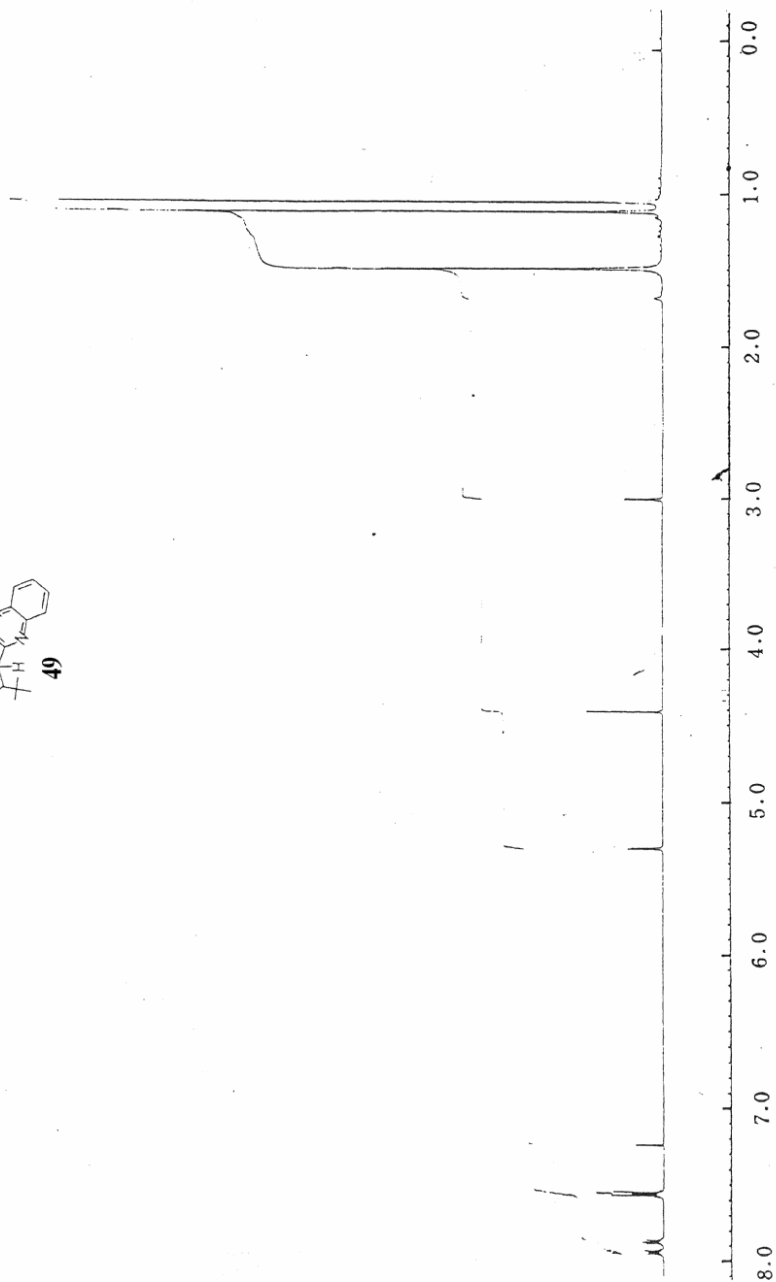

<sup>1</sup>H NMR (49)

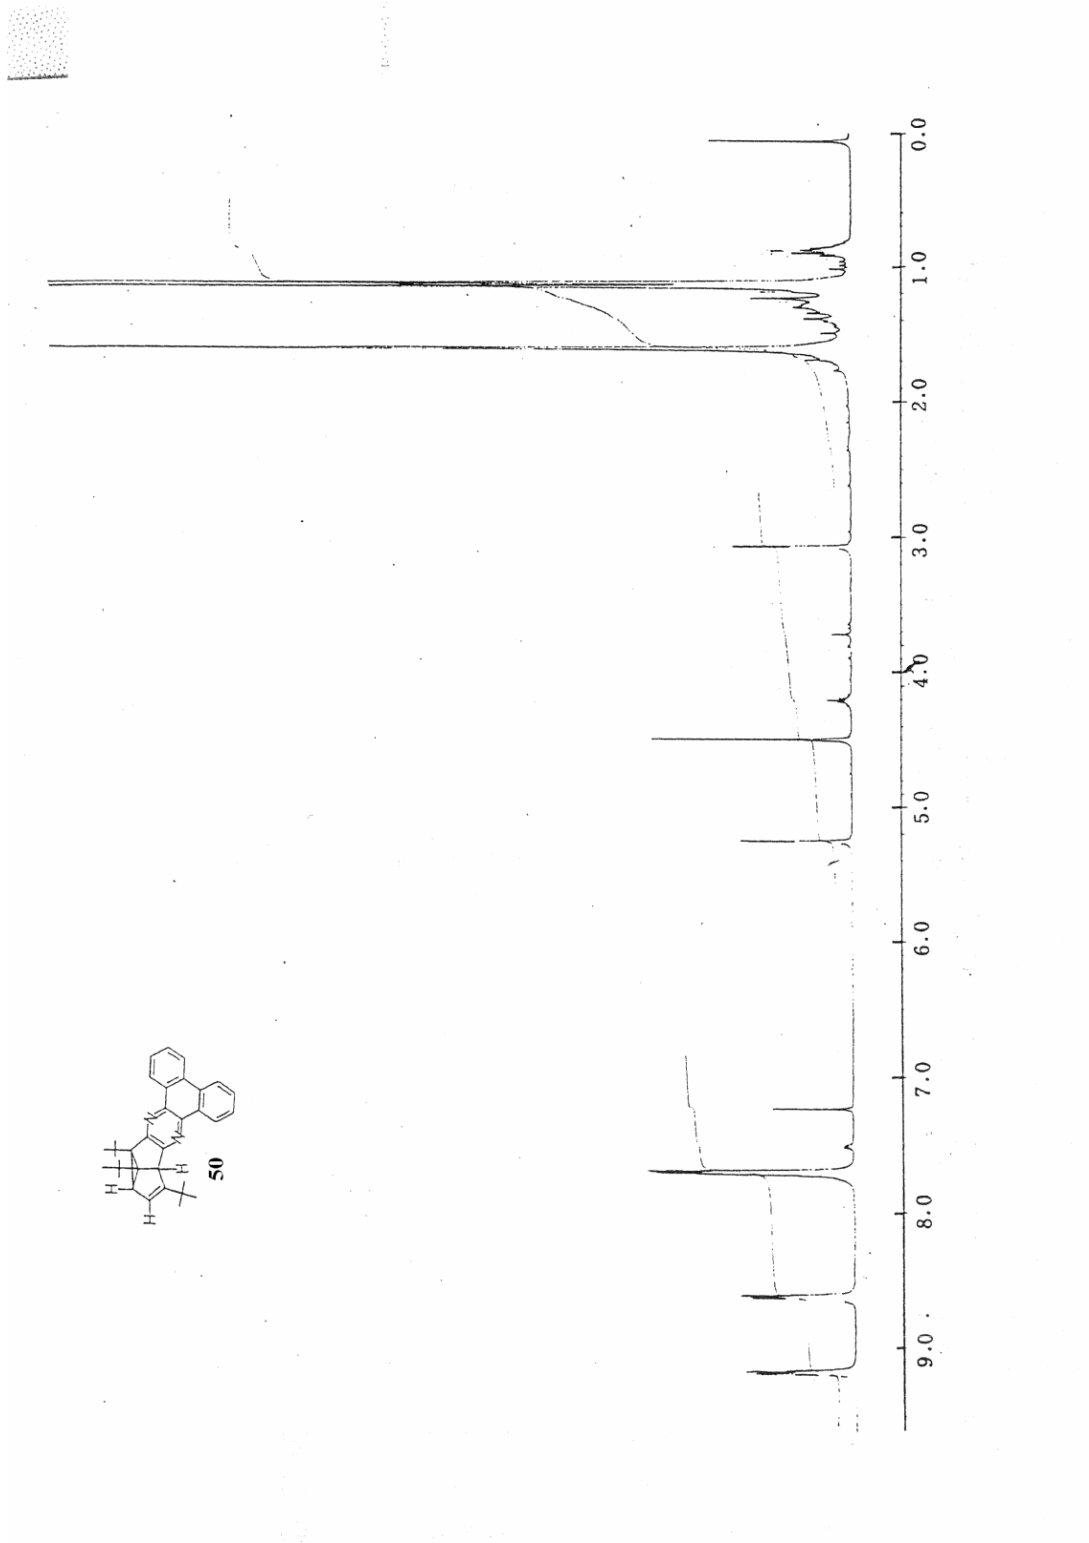

<sup>1</sup>H NMR (50)

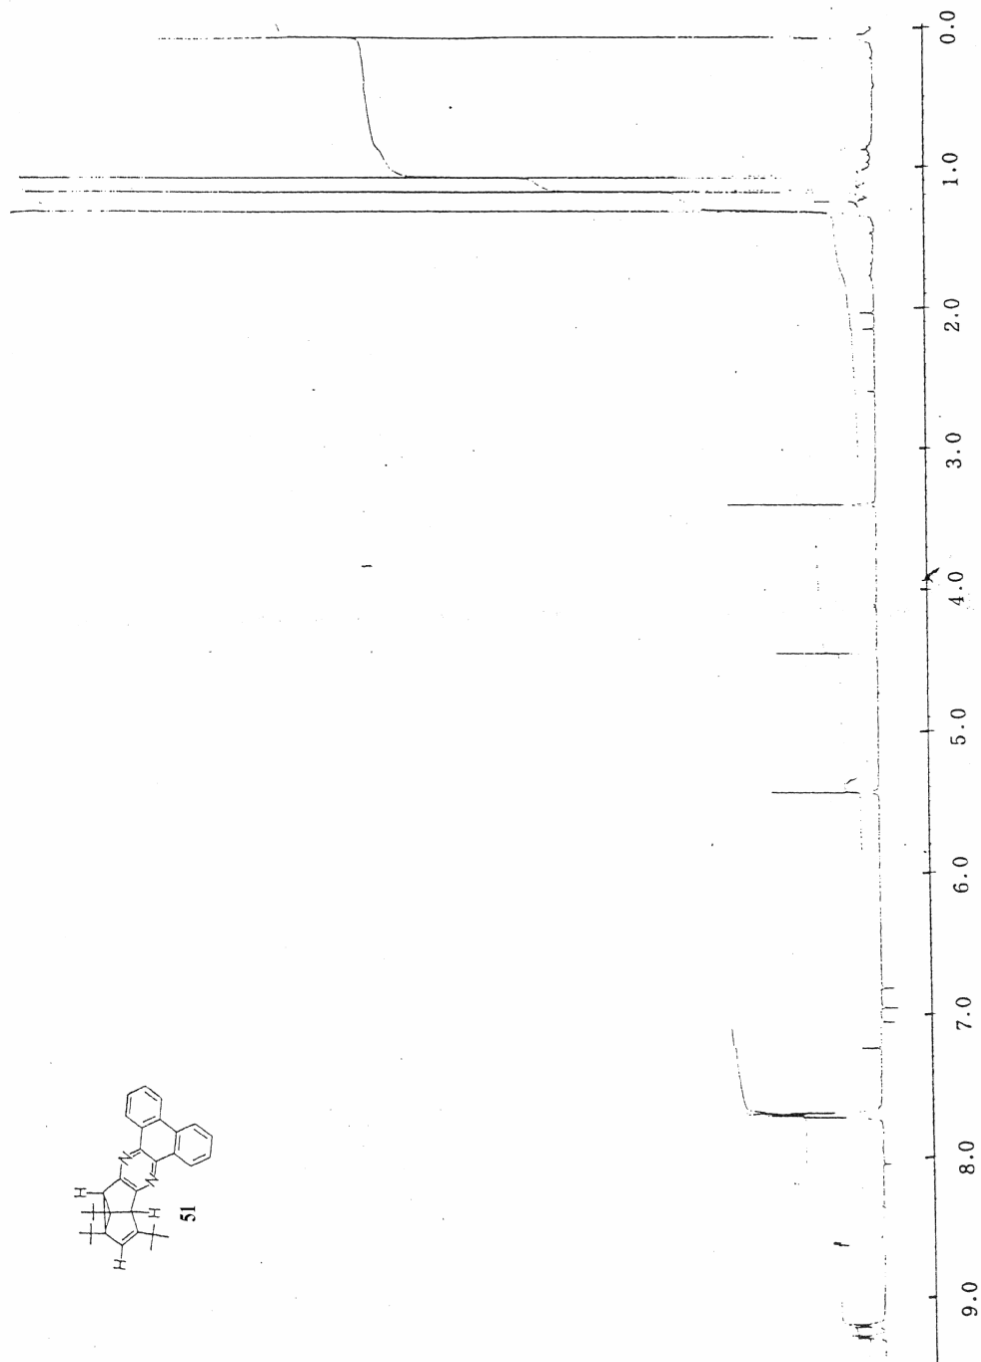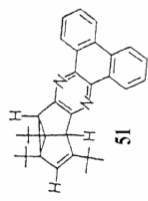

<sup>1</sup>H NMR (51)

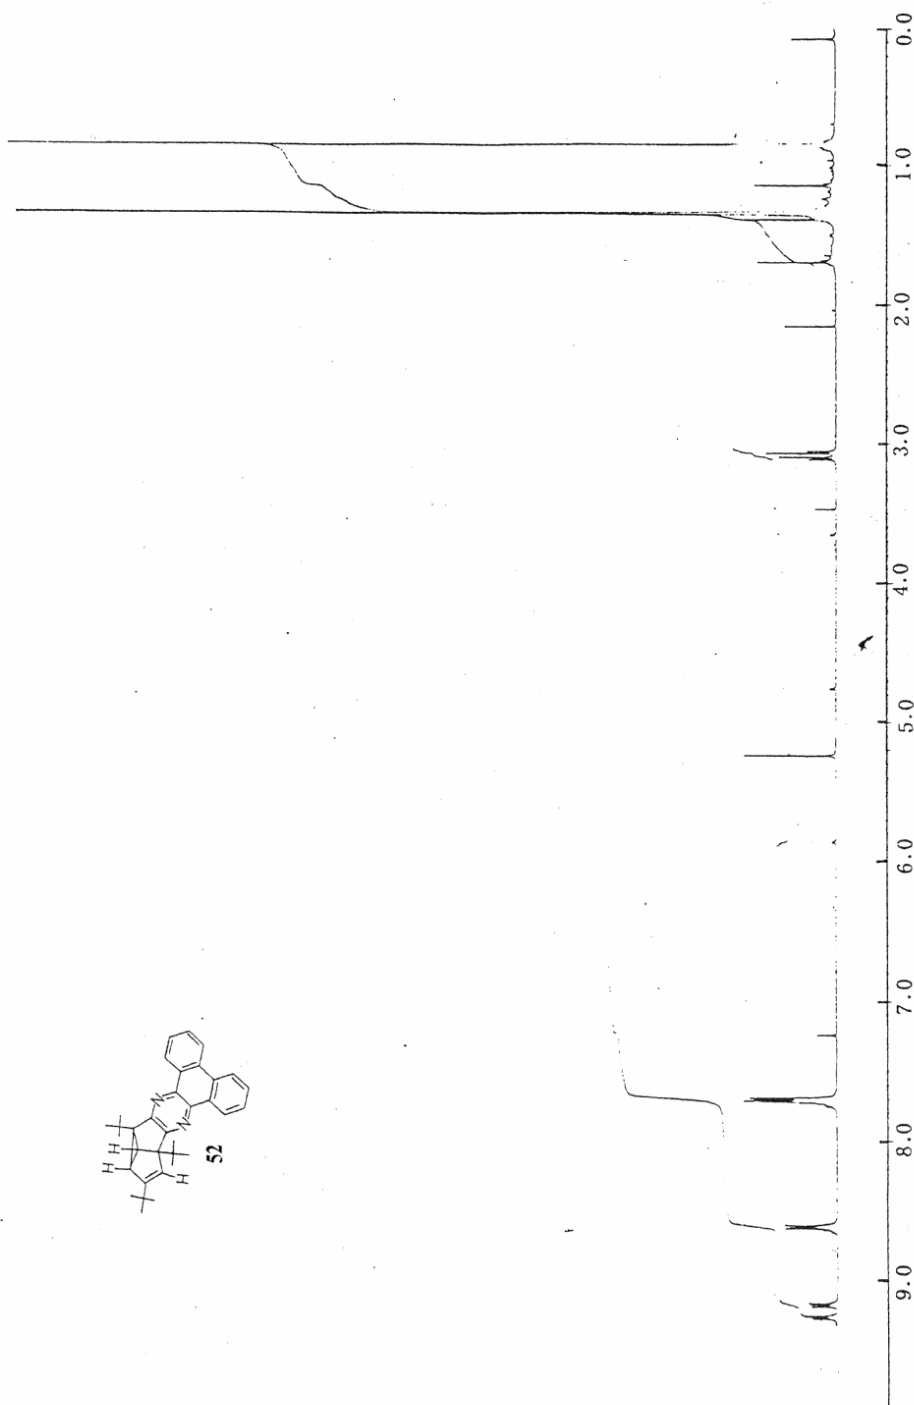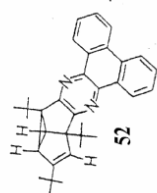

$^1\text{H}$  NMR (52)

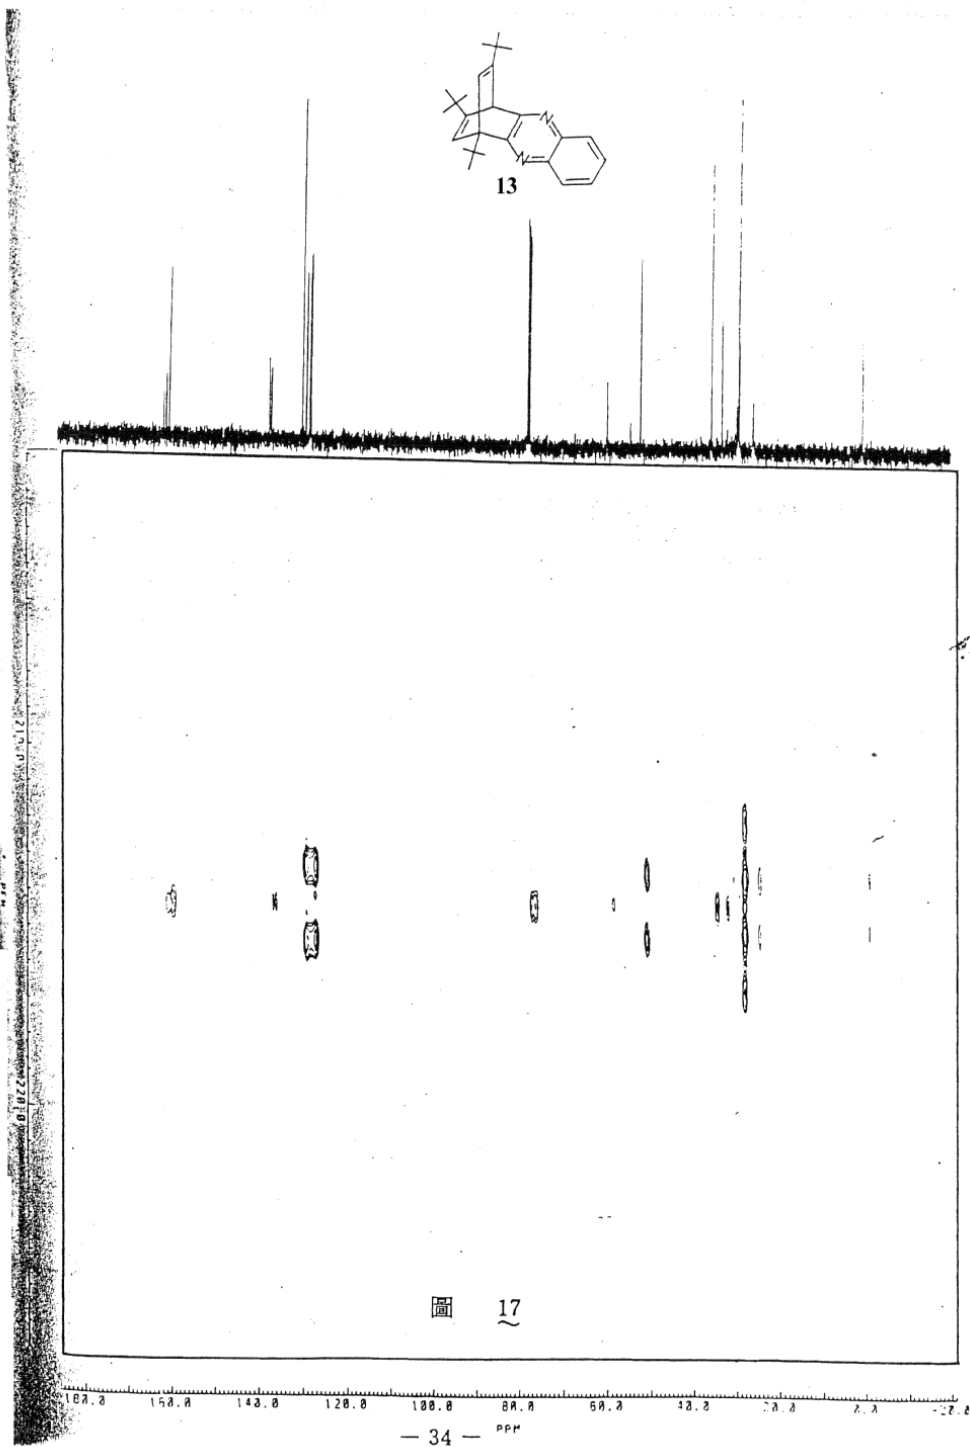

2D-COSY (13)

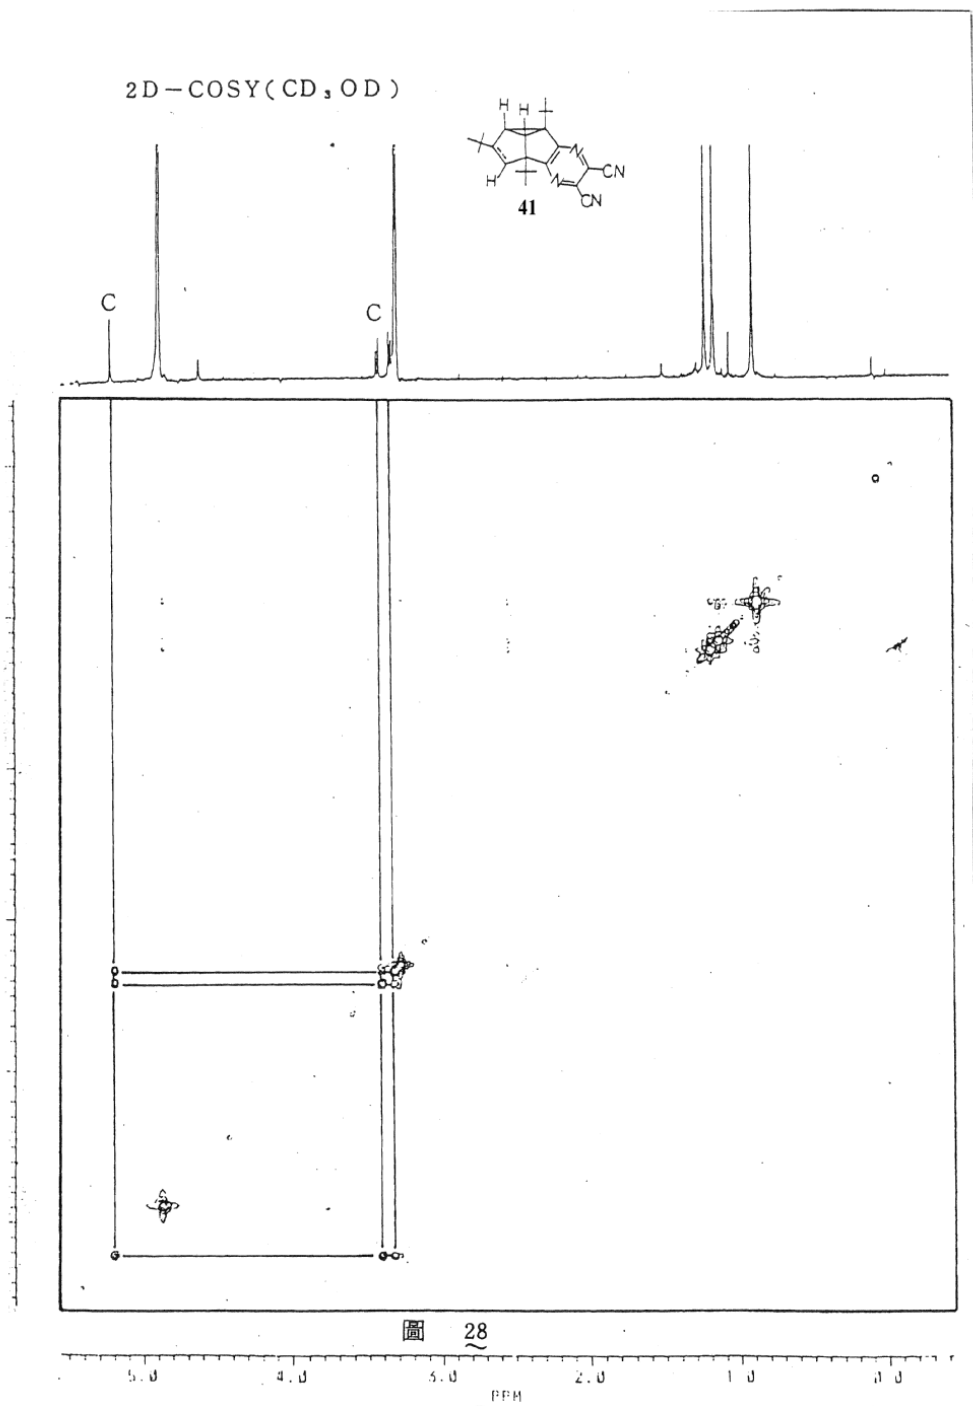

2D-COSY (41)

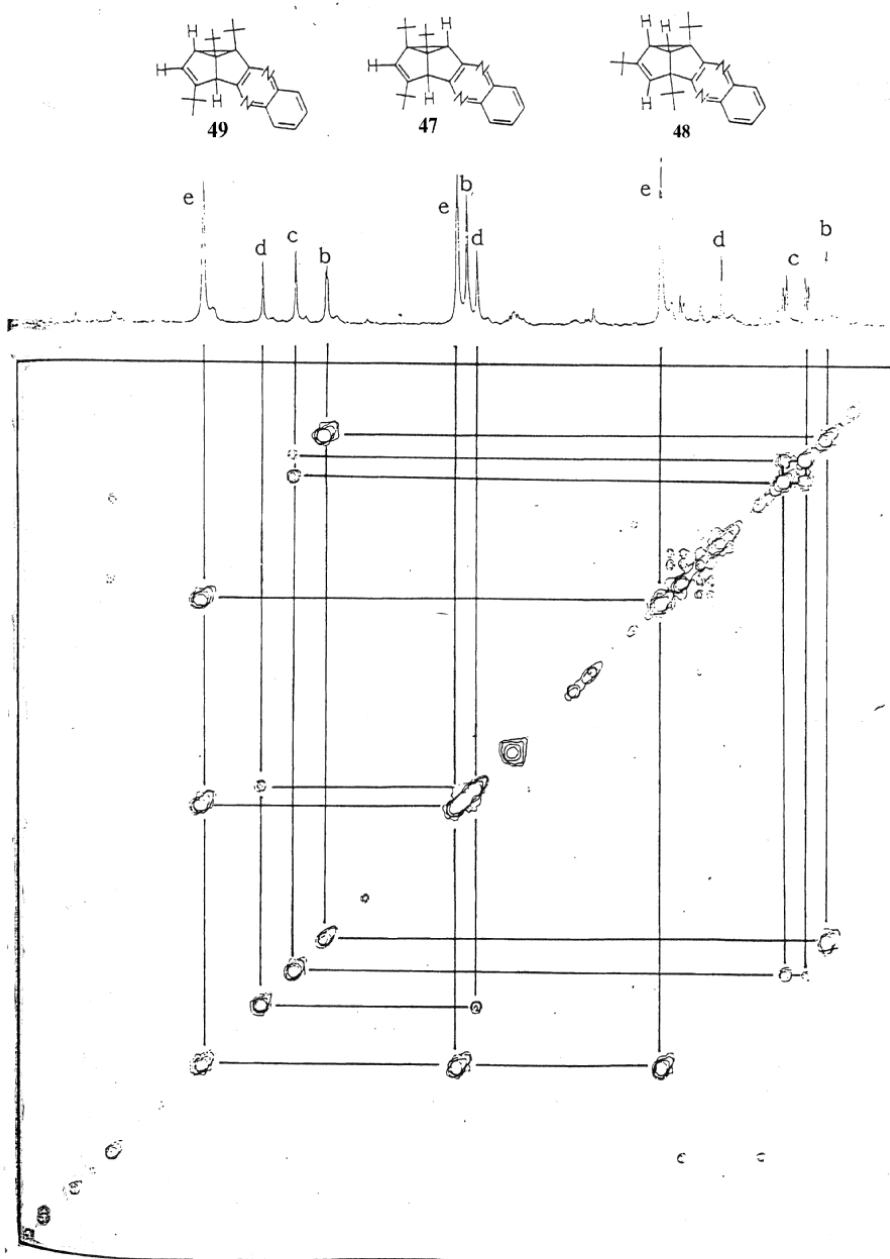

2D-COSY (47, 48, 49)
